# Supplementary material for: Subspecies Typing of Streptococcus agalactiae Based on Ribosomal Subunit Protein Mass Variation by MALDI-TOF MS
Source: Front Microbiol. 2019 Mar 11;10:471. doi: 10.3389/fmicb.2019.00471 (PMC6421976; doi:10.3389/fmicb.2019.00471)
Supplement: Supplementary file 1 [file Table_1.xlsx]

## Sheet: S1
Supplementary Table S1: Metadata of 796 Group B Streptococcus (GBS) whole genome sequences used in this study.
Isolate.Name	BioSample.ID	Assembly.Accession	Isolation.Host	Isolation.Source	Isolation.Origin	Isolation.Date	Host.Health	Host.Disease	ST	CC	Serotype	Pilus islands	Alp variant	Lmb variant	BibA variant	Sip variant	rsp-profile
UBN-6-2K	SAMD00042787	GCF_001592635.1	Fish		Thailand: Ubol-NE	2012	Diseased		283	CC283	III	PI-1 and PI-2a	AlphaC	Allele1	gbs2018a	Allele3	rsp-profile 4
KKN-3-1L	SAMD00042788	GCF_001592615.1	Fish		Thailand:Khon Kaen-NE	2012	Diseased		7	CC7	Ia	PI-1 and PI-2b	AlphaC		gbs2018a	Allele3	rsp-profile 5
B41VS	SAMEA1031412	GCF_001348535.1	Human		Australia	2008	Healthy		652	CC10	II	PI-1 and PI-2a	AlphaC	Allele1	gbs2018a	Allele3	rsp-profile 5
GB-NI-004	SAMEA1031414	GCF_001222045.1	Human		Great Britain	2010	Diseased	EOD	17	CC17	III	PI-1 and PI-2b	Rib	Allele2	gbs2018e	Allele4	rsp-profile 2
BG-NI-011	SAMEA1031415	GCF_001348555.1	Human		Bulgaria	2010	Healthy		1	CC1	V	PI-1 and PI-2a	Alp2/3	Allele1	gbs2018a	Allele1	rsp-profile 3
CZ-NI-007	SAMEA1031416	GCF_001348575.1	Human		Czech Republic	2008	Healthy		255	CC7	Ib	PI-1 and PI-2b	Epsilon	Allele1	gbs2018a	Allele3	rsp-profile 5
DK-NI-010	SAMEA1031417	GCF_001348595.1	Human		Denmark	2009	Diseased	EOD	19	CC19	III	PI-1 and PI-2a	Rib	Allele1	gbs2018b	Allele1	rsp-profile 6
B24VD	SAMEA1031418	GCF_001348615.1	Human		Australia	2008	Healthy		28	CC19	II	PI-1 and PI-2a	Rib	Allele2	gbs2018b	Allele1	rsp-profile 6
IT-NI-033	SAMEA1031419	GCF_001146325.1	Human		Italy	2010	Diseased	EOD	17	CC17	III	PI-1 and PI-2b	Rib	Allele2	gbs2018e	Allele4	rsp-profile 2
DE-NI-007	SAMEA1031420	GCF_001089905.1	Human		Germany	2008	Diseased	EOD	19	CC19	III	PI-1 and PI-2a	Rib	Allele1	gbs2018b	Allele1	rsp-profile 6
GB-NI-005	SAMEA1031422	GCF_001222545.1	Human		Great Britain	2009	Diseased	EOD	SLV17	CC17	III	PI-1 and PI-2b	Rib	Allele2	gbs2018e	Allele4	rsp-profile 2
IT-NI-034	SAMEA1031423	GCF_001103625.1	Human		Italy	2010	Diseased	EOD	17	CC17	III	PI-1 and PI-2b	Rib	Allele2	gbs2018e	Allele4	rsp-profile 2
IT-NI-009	SAMEA1031424	GCF_001106525.1	Human		Italy	2008	Diseased	EOD	17	CC17	III	PI-1 and PI-2b	Rib	Other	gbs2018e	Allele4	rsp-profile 2
BG-NI-012	SAMEA1031425	GCF_001123965.1	Human		Bulgaria	2010	Diseased	EOD	19	CC19	III	PI-1 and PI-2a	Rib	Allele1	gbs2018b	Allele1	rsp-profile 6
BG-NI-004	SAMEA1031426	GCF_001348635.1	Human		Bulgaria	2010	Healthy		23	CC23	Ia	PI-2a	Epsilon	Allele1	gbs2018b	Allele5	rsp-profile 4
B50VS	SAMEA1031427	GCF_001348655.1	Human		Australia	2008	Healthy		23	CC23	Ia	PI-2a	Epsilon	Allele1	gbs2018b	Allele5	rsp-profile 4
GB-NI-003	SAMEA1031428	GCF_001221965.1	Human		Great Britain	2009	Diseased	EOD	17	CC17	III	PI-1 and PI-2b	Rib	Allele2	gbs2018e	Allele4	rsp-profile 42
DK-NI-003	SAMEA1031430	GCF_001098165.1	Human		Denmark	2009	Healthy		523	CC10	Ib	PI-1 and PI-2a	AlphaC	Allele1	gbs2018a	Other	rsp-profile 5
GB-NI-002	SAMEA1031431	GCF_001217725.1	Human		Great Britain	2009	Diseased	EOD	SLV130	ST130	IX	PI-2a	AlphaC	Other	gbs2018a	Allele3	rsp-profile 43
BG-NI-005	SAMEA1031432	GCF_001102825.1	Human		Bulgaria	2009	Diseased	EOD	23	CC23	Ia	PI-2a	Epsilon	Allele1	gbs2018b	Allele5	rsp-profile 4
DK-NI-009	SAMEA1031433	GCF_001093745.1	Human		Denmark	2009	Healthy		28	CC19	II	PI-1 and PI-2a	Rib	Other	gbs2018b	Allele1	rsp-profile 6
DE-NI-032	SAMEA1031434	GCF_001162445.1	Human		Germany	2009	Diseased	EOD	17	CC17	III	PI-1 and PI-2b	Rib	Allele2	gbs2018e	Allele4	rsp-profile 2
DK-NI-015	SAMEA1031435	GCF_001348675.1	Human		Denmark	2008	Healthy		10	CC10	V	PI-1 and PI-2a	AlphaC	Allele2	gbs2018a	Allele3	rsp-profile 5
DE-NI-006	SAMEA1031437	GCF_001140025.1	Human		Germany	2008	Diseased	EOD	144	CC23	Ia	PI-2a	Rib	Allele1	gbs2018b	Allele5	rsp-profile 4
CZ-NI-008	SAMEA1031438	GCF_001140565.1	Human		Czech Republic	2008	Healthy		1	CC1	V	PI-1 and PI-2a	Alp2/3	Allele1	gbs2018a	Allele1	rsp-profile 3
B15VD	SAMEA1031439	GCF_001166605.1	Human		Australia	2008	Healthy		17	CC17	III	PI-1 and PI-2b	Rib	Allele2	gbs2018e	Allele4	rsp-profile 2
DK-NI-013	SAMEA1031440	GCF_001348695.1	Human		Denmark	2010	Healthy		1	CC1	V	PI-1 and PI-2a	Alp2/3	Allele1	gbs2018a	Allele1	rsp-profile 3
B68VD	SAMEA1031441	GCF_001127125.1	Human		Australia	2008	Healthy		SLV19	CC19	III	PI-1 and PI-2a	Rib	Allele1	gbs2018b	Allele1	rsp-profile 6
B96V	SAMEA1031442	GCF_001348715.1	Human		Australia	2008	Healthy		17	CC17	III	PI-1 and PI-2b	Rib	Allele2	gbs2018e	Allele4	rsp-profile 2
DE-NI-0013	SAMEA1031443	GCF_001155125.1	Human		Germany	2009	Diseased	EOD	17	CC17	III	PI-1 and PI-2b	Rib	Allele2	gbs2018e	Allele4	rsp-profile 2
RBH05	SAMEA1031444	GCF_001173205.1	Human		Australia	2008	Healthy		1	CC1	V	PI-1 and PI-2a	Alp2/3	Allele1	gbs2018a	Allele1	rsp-profile 3
BG-NI-003	SAMEA1031445	GCF_001133625.1	Human		Bulgaria	2009	Healthy		8	CC10	Ib	PI-1 and PI-2a	AlphaC	Allele1	gbs2018a	Allele3	rsp-profile 5
IT-NI-028	SAMEA1031446	GCF_001174785.1	Human		Italy	2009	Diseased	EOD	1	CC1	V	PI-1 and PI-2a	Alp2/3	Allele1	gbs2018a	Allele1	rsp-profile 3
CZ-NI-001	SAMEA1031447	GCF_001099185.1	Human		Czech Republic	2008	Healthy		23	CC23	Ia	PI-2a		Allele1	gbs2018b	Allele5	rsp-profile 4
RBH06	SAMEA1031448	GCF_001348735.1	Human		Australia	2008	Healthy		22	ST22	II	PI-2a	AlphaC	Allele1	gbs2018a	Allele7	rsp-profile 4
DK-NI-002	SAMEA1031449	GCF_001119085.1	Human		Denmark	2009	Diseased	EOD	23	CC23	V	PI-2a	Epsilon	Allele2	gbs2018b	Allele5	rsp-profile 4
IT-NI-008	SAMEA1031450	GCF_001348755.1	Human		Italy	2008	Diseased	EOD	SLV17	CC17	III	PI-1 and PI-2b	Rib	Allele2	gbs2018e	Allele4	rsp-profile 2
GB-NI-014	SAMEA1031451	GCF_001222685.1	Human		Great Britain	2008	Diseased	EOD	22	ST22	II	PI-2a	AlphaC	Allele1	gbs2018a	Allele7	rsp-profile 4
IT-NI-031	SAMEA1031452	GCF_001108625.1	Human		Italy	2010	Diseased	EOD	1	CC1	V	PI-1 and PI-2a	Alp2/3	Allele1	gbs2018a	Allele1	rsp-profile 3
DE-NI-033	SAMEA1031453	GCF_001162145.1	Human		Germany	2010	Diseased	EOD	23	CC23	Ia	PI-2a	Epsilon	Allele1	gbs2018b	Allele5	rsp-profile 4
DK-NI-012	SAMEA1031455	GCF_001348775.1	Human		Denmark	2010	Diseased	EOD	1	CC1	V	PI-1 and PI-2a	Alp2/3	Allele1	gbs2018a	Allele1	rsp-profile 3
B09PS	SAMEA1031456	GCF_001156965.1	Human		Australia	2008	Healthy		1	CC1	V	PI-1 and PI-2a	Alp2/3	Allele1	gbs2018a	Allele1	rsp-profile 3
B81VS	SAMEA1031457	GCF_001111745.1	Human		Australia	2008	Healthy		24	CC452	Ia	PI-2a	AlphaC	Allele1	gbs2018b	Allele5	rsp-profile 4
IT-NI-037	SAMEA1031459	GCF_001348795.1	Human		Italy	2010	Diseased	EOD	26	ST26	V	PI-2a	AlphaC	Allele2	gbs2018f	Other	rsp-profile 4
BE-NI-008	SAMEA1031461	GCF_001118625.1	Human		Belgium	2010	Healthy		10	CC10	V	PI-1 and PI-2a	AlphaC	Allele2	gbs2018a	Allele3	rsp-profile 5
BG-NI-002	SAMEA1031462	GCF_001123205.1	Human		Bulgaria	2009	Healthy		17	CC17	III	PI-1 and PI-2b	Rib	Allele2	gbs2018e	Allele4	rsp-profile 2
DE-NI-036	SAMEA1031463	GCF_001138645.1	Human		Germany	2010	Diseased	EOD	17	CC17	III	PI-1 and PI-2b	Rib	Allele2	gbs2018e	Allele4	rsp-profile 2
DE-NI-012	SAMEA1031464	GCF_001348815.1	Human		Germany	2009	Diseased	EOD	88	CC23	Ia	PI-1 and PI-2a	Alp2/3	Allele1	gbs2018b	Allele6	rsp-profile 9
DE-NI-010	SAMEA1031465	GCF_001124925.1	Human		Germany	2008	Diseased	EOD	2	CC1	II	PI-2a	Epsilon	Allele1	gbs2018a	Allele1	rsp-profile 6
IT-NI-007	SAMEA1031466	GCF_001348835.1	Human		Italy	2008	Diseased	EOD	SLV17	CC17	III	PI-1 and PI-2b	Rib	Allele2	gbs2018e	Allele4	rsp-profile 2
IT-NI-032	SAMEA1031467	GCF_001133525.1	Human		Italy	2010	Diseased	EOD	SLV17	CC17	III	PI-1 and PI-2b	Rib	Allele2	gbs2018e	Allele4	rsp-profile 2
GB-NI-015	SAMEA1031468	GCF_001221465.1	Human		Great Britain	2010	Diseased	EOD	19	CC19	III	PI-1 and PI-2a	Rib	Allele1	gbs2018b	Allele1	rsp-profile 6
IT-NI-036	SAMEA1031469	GCF_001160905.1	Human		Italy	2010	Diseased	EOD	26	ST26	V	PI-2a	AlphaC	Allele2	gbs2018f	Other	rsp-profile 4
CZ-NI-016	SAMEA1031470	GCF_001146845.1	Human	Blood	Czech Republic	2010	Diseased	EOD	459	CC459	IV	PI-1 and PI-2a	Epsilon	Allele1	gbs2018a	Allele1	rsp-profile 7
B81VD	SAMEA1031471	GCF_001109825.1	Human		Australia	2008	Healthy		106	CC19	III	PI-1 and PI-2a	Rib	Allele1	gbs2018b	Other	rsp-profile 6
DK-NI-001	SAMEA1031472	GCF_001163105.1	Human		Denmark	2009	Healthy		17	CC17	III	PI-1 and PI-2b	Rib	Allele2	gbs2018e	Allele4	rsp-profile 2
RBH07	SAMEA1031473	GCF_001110105.1	Human		Australia	2008	Healthy		23	CC23	Ia	PI-2a	Epsilon	Allele1	gbs2018b	Allele5	rsp-profile 4
DK-NI-011	SAMEA1031474	GCF_001159365.1	Human		Denmark	2009	Healthy		19	CC19	III	PI-1 and PI-2a	Rib	Allele1	gbs2018b	Allele1	rsp-profile 6
DE-NI-037	SAMEA1031476	GCF_001134625.1	Human		Germany	2010	Diseased	EOD	17	CC17	III	PI-1 and PI-2b	Rib	Allele2	gbs2018e	Allele4	rsp-profile 2
DK-NI-022	SAMEA1031477	GCF_001091485.1	Human		Denmark	2011	Diseased	EOD	1	CC1	V	PI-1 and PI-2a	Alp2/3	Allele1	gbs2018a	Allele1	rsp-profile 3
RBH08	SAMEA1031478	GCF_001151005.1	Human		Australia	2008	Healthy		23	CC23	Ia	PI-2a	Epsilon	Allele1	gbs2018b	Allele5	rsp-profile 4
DK-NI-005	SAMEA1031479	GCF_001348855.1	Human		Denmark	2009	Diseased	EOD	23	CC23	Ia	PI-2a	Epsilon	Allele1	gbs2018b	Allele5	rsp-profile 4
GB-NI-009	SAMEA1031480	GCF_001223485.1	Human		Great Britain	2010	Diseased	EOD	1	CC1	V	PI-1 and PI-2a	Alp2/3	Allele1	gbs2018a	Allele1	rsp-profile 3
CZ-NI-015	SAMEA1031481	GCF_001155785.1	Human		Czech Republic	2009	Diseased	EOD	1	CC1	V	PI-1 and PI-2a	Alp2/3	Allele1	gbs2018a	Allele1	rsp-profile 3
BE-NI-007	SAMEA1031482	GCF_001114925.1	Human		Belgium	2010	Healthy		315	CC17	III	PI-1 and PI-2b	Rib	Allele2	gbs2018e	Allele4	rsp-profile 2
CZ-NI-002	SAMEA1031483	GCF_001097365.1	Human		Czech Republic	2008	Healthy		19	CC19	III	PI-1 and PI-2a	Rib	Allele1	gbs2018b	Allele1	rsp-profile 6
DE-NI-0017	SAMEA1031484	GCF_001087245.1	Human		Germany	2009	Diseased	EOD	17	CC17	III	PI-1 and PI-2b	Rib	Allele2	gbs2018e	Allele4	rsp-profile 48
DK-NI-004	SAMEA1031485	GCF_001153505.1	Human		Denmark	2009	Diseased	EOD	17	CC17	III	PI-1 and PI-2b	Rib	Allele2	gbs2018e	Allele4	rsp-profile 2
RBH02	SAMEA1031486	GCF_001086185.1	Human		Australia	2008	Healthy		2	CC1	IV	PI-1 and PI-2a	Epsilon	Allele1	gbs2018a	Allele1	rsp-profile 3
IT-NI-019	SAMEA1031487	GCF_001348875.1	Human		Italy	2009	Diseased	EOD	467	CC17	III	PI-1 and PI-2b	Rib	Allele2	gbs2018e	Allele4	rsp-profile 2
DE-NI-001	SAMEA1031488	GCF_001110405.1	Human		Germany	2007	Diseased	EOD	1	CC1	V	PI-1 and PI-2a	Alp2/3	Allele1	gbs2018a	Allele1	rsp-profile 3
B50VD	SAMEA1031491	GCF_001124065.1	Human		Australia	2008	Healthy		23	CC23	Ia	PI-2a	Epsilon	Allele1	gbs2018b	Allele5	rsp-profile 4
BG-NI-006	SAMEA1031492	GCF_001134425.1	Human		Bulgaria	2009	Healthy		SLV12	CC10	Ib	PI-1 and PI-2a	AlphaC	Allele1	gbs2018a	Allele3	rsp-profile 5
DE-NI-040	SAMEA1031493	GCF_001115485.1	Human		Germany	2010	Diseased	EOD	23	CC23	Ia	PI-2a	Epsilon	Allele1	gbs2018b	Allele5	rsp-profile 4
DE-NI-014	SAMEA1031494	GCF_001348915.1	Human		Germany	2009	Diseased	EOD	23	CC23	Ia	PI-2a	Epsilon	Allele1	gbs2018b	Allele6	rsp-profile 4
CZ-NI-003	SAMEA1031495	GCF_001088005.1	Human		Czech Republic	2008	Healthy		19	CC19	III	PI-1 and PI-2a	Rib	Allele1	gbs2018b	Allele1	rsp-profile 6
CZ-NI-014	SAMEA1031496	GCF_001164665.1	Human		Czech Republic	2009	Diseased	EOD	479	CC19	II	PI-1 and PI-2a	Rib	Allele2	gbs2018b	Allele1	rsp-profile 6
GB-NI-010	SAMEA1031497	GCF_001218945.1	Human		Great Britain	2010	Diseased	EOD	1	CC1	V	PI-1 and PI-2a	Alp2/3	Allele1	gbs2018a	Allele1	rsp-profile 3
DK-NI-014	SAMEA1031498	GCF_001156365.1	Human		Denmark	2009	Healthy		88	CC23	Ia	PI-2a	Alp2/3	Allele1	gbs2018b	Allele6	rsp-profile 9
DE-NI-041	SAMEA1031499	GCF_001152205.1	Human		Germany	2008	Diseased	EOD	106	CC19	III	PI-1 and PI-2a	Rib	Allele1	gbs2018b	Other	rsp-profile 6
DE-NI-003	SAMEA1031501	GCF_001101765.1	Human		Germany	2008	Diseased	EOD	SLV10	CC10	V	PI-1 and PI-2a	AlphaC	Allele2	gbs2018a	Allele3	rsp-profile 5
RBH09	SAMEA1031502	GCF_001109505.1	Human		Australia	2008	Healthy		1	CC1	V	PI-1 and PI-2a	Alp2/3	Allele1	gbs2018a	Other	rsp-profile 3
BG-NI-001	SAMEA1031503	GCF_001103585.1	Human		Bulgaria	2009	Healthy		144	CC23	Ia	PI-2a	Rib	Allele1	gbs2018b	Allele5	rsp-profile 4
RBH01	SAMEA1031504	GCF_001171645.1	Human		Australia	2008	Healthy		19	CC19	III	PI-1 and PI-2a	Rib	Allele1	gbs2018b	Allele1	rsp-profile 6
IT-NI-020	SAMEA1031505	GCF_001348935.1	Human		Italy	2009	Diseased	EOD	17	CC17	III	PI-1 and PI-2b	Rib	Allele2	gbs2018e	Other	rsp-profile 2
BE-NI-001	SAMEA1031506	GCF_001135525.1	Human		Belgium	2009	Healthy		23	CC23	Ia	PI-2a	Epsilon	Allele1	gbs2018b	Allele5	rsp-profile 4
CZ-NI-013	SAMEA1031507	GCF_001348955.1	Human		Czech Republic	2009	Healthy		1	CC1	V	PI-1 and PI-2a	Alp2/3	Allele1	gbs2018a	Allele1	rsp-profile 3
BG-NI-007	SAMEA1031508	GCF_001348975.1	Human		Bulgaria	2009	Healthy		12	CC10	Ib	PI-1 and PI-2a	AlphaC	Allele1	gbs2018a	Allele3	rsp-profile 5
GB-NI-006	SAMEA1031510	GCF_001218205.1	Human		Great Britain	2010	Diseased	EOD	23	CC23	Ia	PI-2a	Epsilon	Allele1	gbs2018b	Allele5	rsp-profile 4
DK-NI-008	SAMEA1031511	GCF_001349015.1	Human		Denmark	2009	Healthy		9	CC10	Ib	PI-1 and PI-2a	AlphaC	Allele1	gbs2018a	Allele3	rsp-profile 5
RBH04	SAMEA1031512	GCF_001145265.1	Human		Australia	2008	Healthy		19	CC19	III	PI-1 and PI-2a	Rib	Allele1	gbs2018b	Allele1	rsp-profile 6
DE-NI-004	SAMEA1031513	GCF_001119265.1	Human		Germany	2008	Diseased	EOD	10	CC10	V	PI-1 and PI-2a	AlphaC	Allele2	gbs2018a	Allele3	rsp-profile 5
DK-NI-019	SAMEA1031514	GCF_001123605.1	Human		Denmark	2010	Healthy		196	CC459	IV	PI-1 and PI-2a	Epsilon	Other	gbs2018a	Allele1	rsp-profile 7
CZ-NI-004	SAMEA1031515	GCF_001102725.1	Human		Czech Republic	2008	Healthy		1	CC1	V	PI-1 and PI-2a	Alp2/3	Allele1	gbs2018a	Allele1	rsp-profile 3
B42VD	SAMEA1031516	GCF_001147785.1	Human		Australia	2008	Healthy		23	CC23	III	PI-1 and PI-2a	Alp2/3	Allele2	gbs2018b	Other	rsp-profile 4
DK-NI-016	SAMEA1031517	GCF_001100165.1	Human		Denmark	2010	Healthy		88	CC23	Ia	PI-1 and PI-2a	Alp2/3	Allele1	gbs2018b	Allele6	rsp-profile 9
RBH11	SAMEA1031518	GCF_001149385.1	Human		Australia	2008	Healthy		19	CC19	III	PI-1 and PI-2a	Rib	Allele1	gbs2018b	Allele1	rsp-profile 6
DE-NI-042	SAMEA1031519	GCF_001142165.1	Human		Germany	2010	Diseased	EOD	19	CC19	III	PI-1 and PI-2a	Rib	Allele1	gbs2018b	Allele1	rsp-profile 6
DE-NI-022	SAMEA1031520	GCF_001104145.1	Human		Germany	2009	Diseased	EOD	3	CC4	V	PI-1 and PI-2a	AlphaC	Allele1	gbs2018a	Allele1	rsp-profile 3
CZ-NI-010	SAMEA1031521	GCF_001147165.1	Human		Czech Republic	2009	Healthy		10	CC10	II	PI-1 and PI-2a	AlphaC	Allele1	gbs2018a	Allele3	rsp-profile 5
GB-NI-007	SAMEA1031522	GCF_001221825.1	Human		Great Britain	2010	Diseased	EOD	19	CC19	III	PI-1 and PI-2a	Rib	Allele1	gbs2018b	Allele1	rsp-profile 6
CZ-NI-005	SAMEA1031524	GCF_001088105.1	Human		Czech Republic	2008	Healthy		23	CC23	Ia	PI-2a	Epsilon	Allele1	gbs2018b	Allele5	rsp-profile 4
DK-NI-021	SAMEA1031525	GCF_001108745.1	Human		Denmark	2009	Healthy		SLV17	CC17	III	PI-1 and PI-2b	Rib	Allele2	gbs2018e	Allele4	rsp-profile 2
DK-NI-007	SAMEA1031526	GCF_001116525.1	Human		Denmark	2009	Diseased	EOD	17	CC17	III	PI-1 and PI-2b	Rib	Allele2	gbs2018e	Allele4	rsp-profile 2
BG-NI-009	SAMEA1031527	GCF_001130545.1	Human		Bulgaria	2008	Healthy		28	CC19	II	PI-1 and PI-2a	Rib	Allele2	gbs2018b	Allele1	rsp-profile 6
B96P	SAMEA1031528	GCF_001104505.1	Human		Australia	2008	Healthy		17	CC17	III	PI-1 and PI-2b	Rib	Allele2	gbs2018e	Allele4	rsp-profile 2
BG-NI-010	SAMEA1031529	GCF_001098005.1	Human		Bulgaria	2009	Healthy		12	CC10	II	PI-1 and PI-2a	AlphaC	Allele1	gbs2018a	Allele3	rsp-profile 5
DE-NI-0019	SAMEA1031530	GCF_001166505.1	Human		Germany	2009	Diseased	EOD	17	CC17	III	PI-1 and PI-2b	Rib	Allele2	gbs2018e	Allele4	rsp-profile 2
RBH12	SAMEA1031531	GCF_001115545.1	Human		Australia	2008	Healthy		19	CC19	III	PI-1 and PI-2a	Rib	Allele1	gbs2018b	Allele1	rsp-profile 6
B37VS	SAMEA1031532	GCF_001349035.1	Human		Australia	2008	Healthy		335	CC19	III	PI-1 and PI-2a	Rib	Allele1	gbs2018b	Allele1	rsp-profile 6
RBH03	SAMEA1031533	GCF_001349055.1	Human		Australia	2008	Healthy		19	CC19	III	PI-1 and PI-2a	Rib	Allele1	gbs2018b	Allele1	rsp-profile 6
CZ-NI-009	SAMEA1031535	GCF_001127665.1	Human		Czech Republic	2008	Healthy		1	CC1	V	PI-1 and PI-2a	Alp2/3	Allele1	gbs2018a	Allele1	rsp-profile 3
IT-NI-003	SAMEA1031536	GCF_001142125.1	Human		Italy	2008	Diseased	EOD	496	CC17	III	PI-1 and PI-2b	Rib	Allele2	gbs2018e	Allele4	rsp-profile 2
CZ-NI-006	SAMEA1031537	GCF_001155905.1	Human		Czech Republic	2008	Healthy		1	CC1	V	PI-1 and PI-2a	Alp2/3	Allele1	gbs2018a	Allele1	rsp-profile 3
LADL-90-503	SAMEA2272027	GCF_000344905.1	Fish		USA: Lousiana	1990	Diseased	Meningitis	260	CC552	Ib	PI-2b				Other	rsp-profile 13
09mas018883	SAMEA2272272	GCF_000427035.1	Bovine	Milk	Sweden	2013	Diseased	Mastitis	1	CC1	V	PI-1 and PI-2a	Alp2/3	Allele1	gbs2018a	Allele1	rsp-profile 3
SS1219	SAMEA2272287	GCF_000347375.1	Frog		Taiwan				260	CC552	Ib	PI-2b				Other	rsp-profile 13
CF01173	SAMEA2272311	GCF_000347435.1	Fish		UK				7	CC7	Ia	PI-1 and PI-2b	AlphaC	Allele1	gbs2018a	Allele3	rsp-profile 5
LADL_05-108a	SAMEA2272359	GCF_000347395.1	Fish		Honduras	2005	Diseased	Meningitis	260	CC552	Ib	PI-2b				Other	rsp-profile 13
ILRI005	SAMEA2272371	GCF_000427075.1	Camel	Pus	Kenya	2004	Diseased	Abscess	609	CC609	V	PI-2b				Other	rsp-profile 37
Mother1	SAMEA2780141	GCF_001398435.1	Human	Vaginal-rectal	France	2012	Healthy		17	CC17	III	PI-1 and PI-2b	Rib	Allele2	gbs2018e	Allele4	rsp-profile 2
Child1	SAMEA2780142	GCF_001398455.1	Human	Blood	France	2012	Diseased	EOD	17	CC17	III	PI-1 and PI-2b	Rib	Allele2	gbs2018e	Allele4	rsp-profile 2
Mother2	SAMEA2780143	GCF_001398475.1	Human	Milk	France	2012	Healthy		23	CC23	Ia	PI-2a	Epsilon	Allele1	gbs2018b	Allele5	rsp-profile 4
Child2	SAMEA2780144	GCF_001398495.1	Human	Blood	France	2012	Diseased	LOD	23	CC23	Ia	PI-2a	Epsilon	Allele1	gbs2018b	Allele5	rsp-profile 4
Mother3	SAMEA2780145	GCF_001398515.1	Human	Urine	France	2008	Healthy		23	CC23	Ia	PI-2a	Epsilon	Allele1	gbs2018b	Allele5	rsp-profile 4
Child3	SAMEA2780146	GCF_001398535.1	Human	Cerebrospinal fluid	France	2008	Diseased	EOD	23	CC23	Ia	PI-2a	Epsilon	Allele1	gbs2018b	Allele5	rsp-profile 4
Mother4	SAMEA2780147	GCF_001398555.1	Human	Vaginal-rectal	France	2008	Healthy		17	CC17	III	PI-1 and PI-2b	Rib	Allele2	gbs2018e	Allele4	rsp-profile 2
Child4	SAMEA2780148	GCF_001398575.1	Human	Blood	France	2008	Diseased	EOD	17	CC17	III	PI-1 and PI-2b	Rib	Allele2	gbs2018e	Allele4	rsp-profile 2
Mother5-1	SAMEA2780149	GCF_001398595.1	Human	Vaginal-rectal	France	2008	Healthy		17	CC17	III	PI-2b	Rib	Allele2	gbs2018e	Allele4	rsp-profile 2
Mother5-2	SAMEA2780150	GCF_001398615.1	Human	Milk	France	2008	Healthy		17	CC17	III	PI-2b	Rib	Allele2	gbs2018e	Allele4	rsp-profile 2
Child5	SAMEA2780151	GCF_001398635.1	Human	Blood	France	2008	Diseased	LOD	17	CC17	III	PI-2b	Rib	Allele2	gbs2018e	Allele4	rsp-profile 2
Mother6	SAMEA2780152	GCF_001398655.1	Human	Urine	France	2008	Healthy		24	CC452	Ia	PI-2a	AlphaC	Allele1	gbs2018b	Allele5	rsp-profile 4
Child6-1	SAMEA2780153	GCF_001398675.1	Human	Blood	France	2008	Diseased	EOD	24	CC452	Ia	PI-2a	AlphaC	Allele1	gbs2018b	Allele5	rsp-profile 4
Child6-2	SAMEA2780154	GCF_001398695.1	Human	Gastric fluid	France	2008	Diseased	EOD	24	CC452	Ia	PI-2a	AlphaC	Allele1	gbs2018b	Allele5	rsp-profile 4
Mother7	SAMEA2780155	GCF_001398715.1	Human	Blood	France	2008	Healthy		1	CC1	V	PI-1 and PI-2a	Alp2/3	Allele1	gbs2018a	Allele1	rsp-profile 3
Child7	SAMEA2780156	GCF_001398735.1	Human	Blood	France	2008	Diseased	LOD	17	CC17	III	PI-1 and PI-2b	Rib	Allele2	gbs2018e	Other	rsp-profile 2
Mother8	SAMEA2780157	GCF_001398755.1	Human	Vaginal-rectal	France	2008	Healthy		17	CC17	III	PI-1 and PI-2b	Rib	Allele2	gbs2018e	Allele4	rsp-profile 2
Child8-1	SAMEA2780158	GCF_001398775.1	Human	Cerebrospinal fluid	France	2008	Diseased	EOD	17	CC17	III	PI-1 and PI-2b	Rib	Allele2	gbs2018e	Allele4	rsp-profile 2
Child8-2	SAMEA2780159	GCF_001398795.1	Human	Blood	France	2008	Diseased	EOD	17	CC17	III	PI-1 and PI-2b	Rib	Allele2	gbs2018e	Allele4	rsp-profile 2
Mother9	SAMEA2780160	GCF_001398815.1	Human	Amniotic fluid	France	2008	Healthy		23	CC23	III	PI-1 and PI-2a	Alp2/3	Allele2	gbs2018b	Other	rsp-profile 4
Child9	SAMEA2780161	GCF_001398835.1	Human	Blood	France	2008	Diseased	EOD	23	CC23	III	PI-1 and PI-2a	Alp2/3	Allele2	gbs2018b	Other	rsp-profile 4
Mother10-1	SAMEA2780162	GCF_001398855.1	Human	Milk	France	2009	Healthy		23	CC23	Ia	PI-2a	Rib	Allele1	gbs2018b	Other	rsp-profile 4
Mother10-2	SAMEA2780163	GCF_001398875.1	Human	Vaginal-rectal	France	2009	Healthy		23	CC23	Ia	PI-2a	Rib	Allele1	gbs2018b	Other	rsp-profile 4
Child10	SAMEA2780164	GCF_001398895.1	Human	Blood	France	2009	Diseased	LOD	23	CC23	Ia	PI-2a	Rib	Allele1	gbs2018b	Other	rsp-profile 4
Mother11	SAMEA2780165	GCF_001398915.1	Human	Vaginal-rectal	France	2009	Healthy		23	CC23	Ia	PI-2a	Epsilon	Allele1	gbs2018b	Allele5	rsp-profile 4
Child11-1	SAMEA2780166	GCF_001398935.1	Human	Blood	France	2009	Diseased	LOD	17	CC17	III	PI-1 and PI-2b	Rib	Allele2	gbs2018e	Allele4	rsp-profile 2
Child11-2	SAMEA2780167	GCF_001398955.1	Human	Blood	France	2009	Diseased	LOD	17	CC17	III	PI-1 and PI-2b	Rib	Allele2	gbs2018e	Allele4	rsp-profile 2
Mother12	SAMEA2780168	GCF_001398975.1	Human	Blood	France	2009	Healthy		27	CC19	III	PI-2a	Rib	Allele1	gbs2018b	Other	rsp-profile 23
Child12-1	SAMEA2780169	GCF_001398995.1	Human	Gastric fluid	France	2009	Diseased	EOD	27	CC19	III	PI-2a	Rib	Allele1	gbs2018b	Other	rsp-profile 16
Child12-2	SAMEA2780170	GCF_001399015.1	Human	Blood	France	2009	Diseased	EOD	27	CC19	III	PI-2a	Rib	Allele1	gbs2018b	Other	rsp-profile 16
Mother13	SAMEA2780171	GCF_001399035.1	Human	Milk	France	2010	Healthy		17	CC17	III	PI-1 and PI-2b	Rib	Allele2	gbs2018e	Allele4	rsp-profile 2
Child13	SAMEA2780172	GCF_001399055.1	Human	Cerebrospinal fluid	France	2010	Diseased	EOD	17	CC17	III	PI-1 and PI-2b	Rib	Allele2	gbs2018e	Allele4	rsp-profile 2
Mother14	SAMEA2780173	GCF_001399075.1	Human	Milk	France	2010	Healthy		17	CC17	III	PI-1 and PI-2b	Rib	Allele2	gbs2018e	Allele4	rsp-profile 24
Child14	SAMEA2780174	GCF_001399095.1	Human	Cerebrospinal fluid	France	2010	Diseased	LOD	17	CC17	III	PI-1 and PI-2b	Rib	Allele2	gbs2018e	Allele4	rsp-profile 2
Mother15	SAMEA2780175	GCF_001399115.1	Human	Vaginal-rectal	France	2010	Healthy		1	CC1	V	PI-1 and PI-2a	Alp2/3	Allele1	gbs2018a	Allele1	rsp-profile 25
Child15-1	SAMEA2780177	GCF_001399135.1	Human	Gastric fluid	France	2010	Diseased	EOD	1	CC1	V	PI-1 and PI-2a	Alp2/3	Allele1	gbs2018a	Allele1	rsp-profile 3
Child15-2	SAMEA2780178	GCF_001399155.1	Human	Blood	France	2010	Diseased	EOD	1	CC1	V	PI-1 and PI-2a	Alp2/3	Allele1	gbs2018a	Allele1	rsp-profile 3
Mother16	SAMEA2780179	GCF_001399175.1	Human	Placenta	France	2011	Healthy		17	CC17	III	PI-1 and PI-2b	Rib	Allele2	gbs2018e	Allele4	rsp-profile 2
Child16	SAMEA2780180	GCF_001399195.1	Human	Gastric fluid	France	2011	Diseased	EOD	17	CC17	III	PI-1 and PI-2b	Rib	Allele2	gbs2018e	Allele4	rsp-profile 2
Mother17	SAMEA2780181	GCF_001399295.1	Human	Placenta	France	2011	Healthy		17	CC17	III	PI-1 and PI-2b	Rib	Allele2	gbs2018e	Allele4	rsp-profile 2
Child17	SAMEA2780182	GCF_001399315.1	Human	Blood	France	2011	Diseased	EOD	17	CC17	III	PI-1 and PI-2b	Rib	Allele2	gbs2018e	Allele4	rsp-profile 2
Mother18	SAMEA2780183	GCF_001399335.1	Human	Blood	France	2011	Healthy		24	CC452	Ia	PI-2a	AlphaC	Allele1	gbs2018b	Allele5	rsp-profile 4
Child18	SAMEA2780184	GCF_001399355.1	Human	Blood	France	2011	Diseased	EOD	24	CC452	Ia	PI-2a	AlphaC	Allele1	gbs2018b	Allele5	rsp-profile 4
Mother19	SAMEA2780185	GCF_001399375.1	Human	Vaginal-rectal	France	2011	Healthy		SLV17	CC17	III	PI-1 and PI-2b	Rib	Allele2	gbs2018e	Allele4	rsp-profile 2
Child19-1	SAMEA2780186	GCF_001399395.1	Human	Cerebrospinal fluid	France	2011	Diseased	EOD	SLV17	CC17	III	PI-1 and PI-2b	Rib	Allele2	gbs2018e	Allele4	rsp-profile 2
Child19-2	SAMEA2780187	GCF_001399415.1	Human	Blood	France	2011	Diseased	EOD	SLV17	CC17	III	PI-1 and PI-2b	Rib	Allele2	gbs2018e	Allele4	rsp-profile 2
Child19-3	SAMEA2780188	GCF_001399435.1	Human	Urine	France	2011	Diseased	EOD	SLV17	CC17	III	PI-1 and PI-2b	Rib	Allele2	gbs2018e	Allele4	rsp-profile 2
Bangui-IP-6	SAMEA2803882	GCF_000825945.1	Human	Vaginal-rectal	Central African Republic	2006	Healthy		23	CC23	Ia	PI-2a	Epsilon	Allele1	gbs2018b	Allele5	rsp-profile 4
Bangui-IP-59	SAMEA2803883	GCF_000825965.1	Human		Central African Republic	2007	Healthy		1	CC1	V	PI-1 and PI-2a	Alp2/3	Allele1	gbs2018a	Allele1	rsp-profile 3
Bangui-IP-105	SAMEA2803884	GCF_000825985.1	Human	Vaginal-rectal	Central African Republic	2006	Healthy		26	ST26	V	PI-2a		Allele2	gbs2018f	Other	rsp-profile 4
CCH210145919	SAMEA2803885	GCF_000826005.1	Human		France	2010	Healthy		17	CC17	III	PI-1 and PI-2b	Rib	Allele2	gbs2018e	Allele4	rsp-profile 2
Madagascar-IP-47	SAMEA2803886	GCF_000826025.1	Human		Madagascar		Healthy		10	CC10	II	PI-1 and PI-2a	AlphaC	Allele1	gbs2018a	Allele3	rsp-profile 5
NEM316	SAMEA3138330	GCF_000196055.1	Human	Blood	France	2002	Diseased	Sepsis	23	CC23	III	PI-1 and PI-2a	Alp2/3	Allele1	gbs2018b	Allele1	rsp-profile 4
COH1	SAMEA3139000	GCF_000689235.1	Human		USA: WA	1985	Diseased	Sepsis Neonatal	17	CC17	III	PI-1 and PI-2b	Rib	Allele2	gbs2018e	Allele4	rsp-profile 2
9857	SAMEA3888064	GCF_900073175.1	Bovine	Milk	France	1996	Diseased	Mastitis	61	CC67	II	PI-2b	Alp4		gbs2018c	Allele2	rsp-profile 1
10058	SAMEA3888065	GCF_900073555.1	Bovine	Milk	France	1997	Diseased	Mastitis	416	CC67	III	PI-2b	Alp4		gbs2018c	Allele2	rsp-profile 1
10059	SAMEA3888066	GCF_900073475.1	Bovine	Milk	France	1997	Diseased	Mastitis	416	CC67	III	PI-2b	Alp4		gbs2018c	Allele2	rsp-profile 1
SA2	SAMEA3888067	GCF_900073145.1	Bovine	Milk	Portugal	2011	Diseased	Mastitis	61	CC67	nt	PI-2b	Alp4		gbs2018c	Allele2	rsp-profile 1
SA4	SAMEA3888069	GCF_900073295.1	Bovine	Milk	Portugal	2011	Diseased	Mastitis	61	CC67	II	PI-2b	Alp4		gbs2018c	Allele2	rsp-profile 1
SA8	SAMEA3888072	GCF_900073585.1	Bovine	Milk	Portugal	2011	Diseased	Mastitis	61	CC67	nt	PI-2b	Alp4		gbs2018c	Allele2	rsp-profile 1
SA11	SAMEA3888075	GCF_900073465.1	Bovine	Milk	Portugal	2011	Diseased	Mastitis	61	CC67	II	PI-2b	Alp4		gbs2018c	Allele2	rsp-profile 1
SA21	SAMEA3888076	GCF_900073595.1	Bovine	Milk	Portugal	2011	Diseased	Mastitis	61	CC67	II	PI-2b	Alp4		gbs2018c	Allele2	rsp-profile 1
SA25	SAMEA3888077	GCF_900073315.1	Bovine	Milk	Portugal	2011	Diseased	Mastitis	61	CC67	II	PI-2b	Alp4		gbs2018c	Allele2	rsp-profile 10
SA26	SAMEA3888078	GCF_900073505.1	Bovine	Milk	Portugal	2011	Diseased	Mastitis	61	CC67	II	PI-2b	Alp4		gbs2018c	Allele2	rsp-profile 10
SA28	SAMEA3888079	GCF_900073335.1	Bovine	Milk	Portugal	2011	Diseased	Mastitis	61	CC67	nt	PI-2b	Alp4		gbs2018c	Allele2	rsp-profile 1
SA29	SAMEA3888080	GCF_900073155.1	Bovine	Milk	Portugal	2011	Diseased	Mastitis	61	CC67	nt	PI-2b	Alp4		gbs2018c	Allele2	rsp-profile 1
SA30	SAMEA3888081	GCF_900073515.1	Bovine	Milk	Portugal	2011	Diseased	Mastitis	61	CC67	nt	PI-2b	Alp4		gbs2018c	Allele2	rsp-profile 1
SA31	SAMEA3888082	GCF_900073615.1	Bovine	Milk	Portugal	2011	Diseased	Mastitis	61	CC67	II	PI-2b	Alp4		gbs2018c	Allele2	rsp-profile 1
SA34	SAMEA3888085	GCF_900073305.1	Bovine	Milk	Portugal	2011	Diseased	Mastitis	61	CC67	II	PI-2b	Alp4		gbs2018c	Allele2	rsp-profile 1
SA35	SAMEA3888086	GCF_900073265.1	Bovine	Milk	Portugal	2012	Diseased	Mastitis	61	CC67	II	PI-2b			gbs2018c	Allele2	rsp-profile 1
SA48	SAMEA3888099	GCF_900073405.1	Bovine	Milk	Portugal	2012	Diseased	Mastitis	61	CC67	II	PI-2b	Alp4		gbs2018c	Allele2	rsp-profile 1
SA52	SAMEA3888103	GCF_900073395.1	Bovine	Milk	Portugal	2012	Diseased	Mastitis	61	CC67	II	PI-2b	Alp4		gbs2018c	Allele2	rsp-profile 1
SA67	SAMEA3888113	GCF_900073195.1	Bovine	Milk	Portugal	2012	Diseased	Mastitis	61	CC67	II	PI-2b			gbs2018c	Allele2	rsp-profile 1
SA76	SAMEA3888116	GCF_900073355.1	Bovine	Milk	Portugal	2012	Diseased	Mastitis	61	CC67	II	PI-2b	Alp4		gbs2018c	Allele2	rsp-profile 1
SA77	SAMEA3888117	GCF_900073455.1	Bovine	Milk	Portugal	2012	Diseased	Mastitis	61	CC67	II	PI-2b	Alp4		gbs2018c	Allele2	rsp-profile 1
SA78	SAMEA3888118	GCF_900073485.1	Bovine	Milk	Portugal	2012	Diseased	Mastitis	61	CC67	II	PI-2b	Alp4		gbs2018c	Allele2	rsp-profile 1
SA79	SAMEA3888119	GCF_900073545.1	Bovine	Milk	Portugal	2012	Diseased	Mastitis	61	CC67	II	PI-2b	Alp4		gbs2018c	Allele2	rsp-profile 1
SA80	SAMEA3888120	GCF_900073625.1	Bovine	Milk	Portugal	2012	Diseased	Mastitis	61	CC67	II	PI-2b	Alp4		gbs2018c	Allele2	rsp-profile 1
SA81	SAMEA3888121	GCF_900073645.1	Bovine	Milk	Portugal	2012	Diseased	Mastitis	61	CC67	II	PI-2b	Alp4		gbs2018c	Allele2	rsp-profile 1
SA82	SAMEA3888122	GCF_900073635.1	Bovine	Milk	Portugal	2012	Diseased	Mastitis	61	CC67	II	PI-2b	Alp4		gbs2018c	Allele2	rsp-profile 1
SA83	SAMEA3888123	GCF_900073695.1	Bovine	Milk	Portugal	2012	Diseased	Mastitis	61	CC67	II	PI-2b	Alp4		gbs2018c	Allele2	rsp-profile 1
SA84	SAMEA3888124	GCF_900073655.1	Bovine	Milk	Portugal	2012	Diseased	Mastitis	61	CC67	II	PI-2b	Alp4		gbs2018c	Allele2	rsp-profile 1
SA85	SAMEA3888125	GCF_900073665.1	Bovine	Milk	Portugal	2012	Diseased	Mastitis	61	CC67	II	PI-2b	Alp4		gbs2018c	Allele2	rsp-profile 1
SA86	SAMEA3888126	GCF_900073685.1	Bovine	Milk	Portugal	2012	Diseased	Mastitis	61	CC67	II	PI-2b	Alp4		gbs2018c	Allele2	rsp-profile 10
SA87	SAMEA3888127	GCF_900073715.1	Bovine	Milk	Portugal	2012	Diseased	Mastitis	61	CC67	II	PI-2b	Alp4		gbs2018c	Allele2	rsp-profile 1
SA89	SAMEA3888129	GCF_900073675.1	Bovine	Milk	Portugal	2012	Diseased	Mastitis	61	CC67	II	PI-2b	Alp4		gbs2018c	Allele2	rsp-profile 1
SA91	SAMEA3888131	GCF_900073725.1	Bovine	Milk	Portugal	2013	Diseased	Mastitis	61	CC67	II	PI-2b	Alp4		gbs2018c	Allele2	rsp-profile 17
SA92	SAMEA3888132	GCF_900073745.1	Bovine	Milk	Portugal	2013	Diseased	Mastitis	61	CC67	II	PI-2b	Alp4		gbs2018c	Allele2	rsp-profile 17
SA93	SAMEA3888133	GCF_900073795.1	Bovine	Milk	Portugal	2013	Diseased	Mastitis	61	CC67	II	PI-2b	Alp4		gbs2018c	Allele2	rsp-profile 1
SA94	SAMEA3888134	GCF_900073735.1	Bovine	Milk	Portugal	2013	Diseased	Mastitis	61	CC67	II	PI-2b	Alp4		gbs2018c	Allele2	rsp-profile 1
SA95	SAMEA3888135	GCF_900073785.1	Bovine	Milk	Portugal	2013	Diseased	Mastitis	61	CC67	II	PI-2b	Alp4		gbs2018c	Allele2	rsp-profile 1
SA96	SAMEA3888136	GCF_900073755.1	Bovine	Milk	Portugal	2013	Diseased	Mastitis	61	CC67	II	PI-2b	Alp4		gbs2018c	Allele2	rsp-profile 1
SA97	SAMEA3888137	GCF_900073815.1	Bovine	Milk	Portugal	2013	Diseased	Mastitis	61	CC67	II	PI-2b	Alp4		gbs2018c	Allele2	rsp-profile 1
SA98	SAMEA3888138	GCF_900073765.1	Bovine	Milk	Portugal	2013	Diseased	Mastitis	61	CC67	II	PI-2b	Alp4		gbs2018c	Allele2	rsp-profile 1
SA99	SAMEA3888139	GCF_900073775.1	Bovine	Milk	Portugal	2013	Diseased	Mastitis	61	CC67	II	PI-2b	Alp4		gbs2018c	Allele2	rsp-profile 1
SA100	SAMEA3888140	GCF_900073205.1	Bovine	Milk	Portugal	2013	Diseased	Mastitis	61	CC67	II	PI-2b	Alp4		gbs2018c	Allele2	rsp-profile 10
SA101	SAMEA3888141	GCF_900073575.1	Bovine	Milk	Portugal	2013	Diseased	Mastitis	61	CC67	II	PI-2b	Alp4		gbs2018c	Allele2	rsp-profile 10
SA102	SAMEA3888142	GCF_900073375.1	Bovine	Milk	Portugal	2013	Diseased	Mastitis	61	CC67	nt	PI-2b	Alp4		gbs2018c	Allele2	rsp-profile 10
SA103	SAMEA3888143	GCF_900073385.1	Bovine	Milk	Portugal	2013	Diseased	Mastitis	61	CC67	II	PI-2b	Alp4		gbs2018c	Allele2	rsp-profile 10
SA109	SAMEA3888149	GCF_900073325.1	Bovine	Milk	Portugal	2013	Diseased	Mastitis	61	CC67	II	PI-2b	Alp4		gbs2018c		rsp-profile 1
SA111	SAMEA3888151	GCF_900078265.1	Bovine	Milk	Portugal	2013	Diseased	Mastitis	61	CC67	II	PI-2b	Alp4		gbs2018c	Allele2	rsp-profile 1
SA115	SAMEA3888155	GCF_900073215.1	Bovine	Milk	Portugal	2013	Diseased	Mastitis	61	CC67	II	PI-2b	Alp4		gbs2018c		rsp-profile 1
SA116	SAMEA3888156	GCF_900073415.1	Bovine	Milk	Portugal	2013	Diseased	Mastitis	61	CC67	II	PI-2b	Alp4		gbs2018c	Allele2	rsp-profile 1
SA118	SAMEA3888158	GCF_900073165.1	Bovine	Milk	Portugal	2013	Diseased	Mastitis	61	CC67	II	PI-2b	Alp4		gbs2018c	Allele2	rsp-profile 1
SA120	SAMEA3888160	GCF_900073185.1	Bovine	Milk	Portugal	2013	Diseased	Mastitis	61	CC67	II	PI-2b	Alp4		gbs2018c	Allele2	rsp-profile 1
SA154	SAMEA3888163	GCF_900073235.1	Bovine	Milk	Portugal	2013	Diseased	Mastitis	61	CC67	II	PI-2b	Alp4		gbs2018c	Allele2	rsp-profile 1
SA194	SAMEA3888166	GCF_900073605.1	Bovine	Milk	Portugal	2013	Diseased	Mastitis	61	CC67	II	PI-2b	Alp4		gbs2018c	Allele2	rsp-profile 1
SA195	SAMEA3888167	GCF_900073445.1	Bovine	Milk	Portugal	2013	Diseased	Mastitis	61	CC67	II	PI-2b	Alp4		gbs2018c	Allele2	rsp-profile 1
SA197	SAMEA3888169	GCF_900073345.1	Bovine	Milk	Portugal	2013	Diseased	Mastitis	61	CC67	II	PI-2b	Alp4		gbs2018c	Allele2	rsp-profile 1
SA208	SAMEA3888172	GCF_900073525.1	Bovine	Milk	Portugal	2013	Diseased	Mastitis	61	CC67	II	PI-2b	Alp4		gbs2018c	Allele2	rsp-profile 1
SA209	SAMEA3888173	GCF_900073225.1	Bovine	Milk	Portugal	2013	Diseased	Mastitis	61	CC67	II	PI-2b	Alp4		gbs2018c	Allele2	rsp-profile 1
SA210	SAMEA3888174	GCF_900073425.1	Bovine	Milk	Portugal	2013	Diseased	Mastitis	61	CC67	II	PI-2b	Alp4		gbs2018c	Allele2	rsp-profile 1
SA223	SAMEA3888178	GCF_900073285.1	Bovine	Milk	Portugal	2013	Diseased	Mastitis	61	CC67	II	PI-2b	Alp4		gbs2018c	Allele2	rsp-profile 1
SA232	SAMEA3888184	GCF_900073565.1	Bovine	Milk	Portugal	2013	Diseased	Mastitis	61	CC67	II	PI-2b	Alp4		gbs2018c	Allele2	rsp-profile 1
SA233	SAMEA3888185	GCF_900073535.1	Bovine	Milk	Portugal	2013	Diseased	Mastitis	61	CC67	II	PI-2b	Alp4		gbs2018c	Allele2	rsp-profile 1
SA296	SAMEA3888204	GCF_900073135.1	Bovine	Milk	Portugal	2014	Diseased	Mastitis	61	CC67	II	PI-2b	Alp4		gbs2018c	Allele2	rsp-profile 1
SA323	SAMEA3888205	GCF_900073435.1	Bovine	Milk	Portugal	2014	Diseased	Mastitis	61	CC67	II	PI-2b	Alp4		gbs2018c	Allele2	rsp-profile 1
SA324	SAMEA3888206	GCF_900073245.1	Bovine	Milk	Portugal	2014	Diseased	Mastitis	61	CC67	II	PI-2b	Alp4		gbs2018c	Allele2	rsp-profile 1
SA325	SAMEA3888207	GCF_900073275.1	Bovine	Milk	Portugal	2014	Diseased	Mastitis	61	CC67	II	PI-2b	Alp4		gbs2018c	Allele2	rsp-profile 1
SA368	SAMEA3888208	GCF_900073365.1	Bovine	Milk	Portugal	2014	Diseased	Mastitis	61	CC67	II	PI-2b	Alp4		gbs2018c	Allele2	rsp-profile 1
VSA3	SAMEA3888210	GCF_900074085.1	Bovine	Milk	Portugal	2002	Diseased	Mastitis	554	CC67	II	PI-2b	Alp4		gbs2018c	Allele2	rsp-profile 1
VSA6	SAMEA3888211	GCF_900074115.1	Bovine	Milk	Portugal	2002	Diseased	Mastitis	61	CC67	II	PI-2b	Alp4		gbs2018c	Allele2	rsp-profile 1
VSA16	SAMEA3888212	GCF_900074045.1	Bovine	Milk	Portugal	2003	Diseased	Mastitis	61	CC67	II	PI-2b	Alp4		gbs2018c	Allele2	rsp-profile 1
VSA17	SAMEA3888213	GCF_900074035.1	Bovine	Milk	Portugal	2002	Diseased	Mastitis	61	CC67	II	PI-2b	Alp4		gbs2018c	Allele2	rsp-profile 1
VSA22	SAMEA3888214	GCF_900074055.1	Bovine	Milk	Portugal	2003	Diseased	Mastitis	61	CC67	II	PI-2b	Alp4		gbs2018c	Allele2	rsp-profile 1
VSA26	SAMEA3888215	GCF_900074065.1	Bovine	Milk	Portugal	2003	Diseased	Mastitis	61	CC67	nt	PI-2b	Alp4		gbs2018c	Other	rsp-profile 60
VSA29	SAMEA3888216	GCF_900074075.1	Bovine	Milk	Portugal	2002	Diseased	Mastitis	61	CC67	II	PI-2b	Alp4		gbs2018c	Allele2	rsp-profile 1
VSA36	SAMEA3888217	GCF_900074095.1	Bovine	Milk	Portugal	2002	Diseased	Mastitis	61	CC67	II	PI-2b	Alp4		gbs2018c	Allele2	rsp-profile 1
VSA44	SAMEA3888218	GCF_900074105.1	Bovine	Milk	Portugal	2003	Diseased	Mastitis	554	CC67	II	PI-2b	Alp4		gbs2018c	Allele2	rsp-profile 1
VSA50	SAMEA3888219	GCF_900074125.1	Bovine	Milk	Portugal	2003	Diseased	Mastitis	554	CC67	II	PI-2b	Alp4		gbs2018c	Allele2	rsp-profile 1
VSA65	SAMEA3888220	GCF_900074135.1	Bovine	Milk	Portugal	2012	Diseased	Mastitis	61	CC67	II	PI-2b	Alp4		gbs2018c	Allele2	rsp-profile 1
VSA66	SAMEA3888221	GCF_900074165.1	Bovine	Milk	Portugal	2012	Diseased	Mastitis	61	CC67	II	PI-2b	Alp4		gbs2018c	Allele2	rsp-profile 1
VSA68	SAMEA3888222	GCF_900074155.1	Bovine	Milk	Portugal	2012	Diseased	Mastitis	554	CC67	II	PI-2b	Alp4		gbs2018c	Allele2	rsp-profile 1
VSA69	SAMEA3888223	GCF_900074145.1	Bovine	Milk	Portugal	2012	Diseased	Mastitis	554	CC67	II	PI-2b	Alp4		gbs2018c	Allele2	rsp-profile 1
VSA70	SAMEA3888224	GCF_900074195.1	Bovine	Milk	Portugal	2013	Diseased	Mastitis	554	CC67	II	PI-2b	Alp4		gbs2018c	Allele2	rsp-profile 1
VSA71	SAMEA3888225	GCF_900074175.1	Bovine	Milk	Portugal	2012	Diseased	Mastitis	554	CC67	II	PI-2b	Alp4		gbs2018c	Allele2	rsp-profile 1
VSA72	SAMEA3888226	GCF_900074205.1	Bovine	Milk	Portugal	2012	Diseased	Mastitis	554	CC67	II	PI-2b	Alp4		gbs2018c	Allele2	rsp-profile 1
VSA73	SAMEA3888227	GCF_900074185.1	Bovine	Milk	Portugal	2013	Diseased	Mastitis	554	CC67	II	PI-2b	Alp4		gbs2018c	Allele2	rsp-profile 1
VSA74	SAMEA3888228	GCF_900074215.1	Bovine	Milk	Portugal	2012	Diseased	Mastitis	554	CC67	II	PI-2b	Alp4		gbs2018c	Allele2	rsp-profile 1
VSA75	SAMEA3888229	GCF_900074225.1	Bovine	Milk	Portugal	2012	Diseased	Mastitis	554	CC67	II	PI-2b	Alp4		gbs2018c	Allele2	rsp-profile 1
VSA77	SAMEA3888230	GCF_900074245.1	Bovine	Milk	Portugal	2012	Diseased	Mastitis	554	CC67	II	PI-2b	Alp4		gbs2018c	Allele2	rsp-profile 1
VSA78	SAMEA3888231	GCF_900074265.1	Bovine	Milk	Portugal	2012	Diseased	Mastitis	554	CC67	II	PI-2b	Alp4		gbs2018c	Allele2	rsp-profile 1
VSA79	SAMEA3888232	GCF_900074255.1	Bovine	Milk	Portugal	2012	Diseased	Mastitis	554	CC67	II	PI-2b	Alp4		gbs2018c	Allele2	rsp-profile 1
VSA80	SAMEA3888233	GCF_900074275.1	Bovine	Milk	Portugal	2012	Diseased	Mastitis	554	CC67	II	PI-2b	Alp4		gbs2018c	Allele2	rsp-profile 1
VSA81	SAMEA3888234	GCF_900074305.1	Bovine	Milk	Portugal	2012	Diseased	Mastitis	554	CC67	II	PI-2b	Alp4		gbs2018c	Allele2	rsp-profile 1
VSA83	SAMEA3888235	GCF_900074295.1	Bovine	Milk	Portugal	2012	Diseased	Mastitis	554	CC67	II	PI-2b	Alp4		gbs2018c	Allele2	rsp-profile 1
VSA84	SAMEA3888236	GCF_900074285.1	Bovine	Milk	Portugal	2012	Diseased	Mastitis	554	CC67	II	PI-2b	Alp4		gbs2018c	Allele2	rsp-profile 1
VSA85	SAMEA3888237	GCF_900074315.1	Bovine	Milk	Portugal	2012	Diseased	Mastitis	554	CC67	II	PI-2b	Alp4		gbs2018c	Allele2	rsp-profile 1
VSA86	SAMEA3888238	GCF_900074335.1	Bovine	Milk	Portugal	2011	Diseased	Mastitis	554	CC67	nt	PI-2b	Alp4		gbs2018c	Allele2	rsp-profile 1
VSA87	SAMEA3888239	GCF_900074325.1	Bovine	Milk	Portugal	2012	Diseased	Mastitis	554	CC67	II	PI-2b	Alp4		gbs2018c	Allele2	rsp-profile 1
VSA88	SAMEA3888240	GCF_900074375.1	Bovine	Milk	Portugal	2012	Diseased	Mastitis	61	CC67	II	PI-2b	Alp4		gbs2018c	Allele2	rsp-profile 1
VSA89	SAMEA3888241	GCF_900074345.1	Bovine	Milk	Portugal	2012	Diseased	Mastitis	61	CC67	II	PI-2b	Alp4		gbs2018c	Allele2	rsp-profile 1
VSA90	SAMEA3888242	GCF_900074365.1	Bovine	Milk	Portugal	2012	Diseased	Mastitis	554	CC67	II		Alp4		gbs2018c	Allele2	rsp-profile 1
VSA91	SAMEA3888243	GCF_900074355.1	Bovine	Milk	Portugal	2013	Diseased	Mastitis	61	CC67	II		Alp4		gbs2018c	Allele2	rsp-profile 1
VSA92	SAMEA3888244	GCF_900074395.1	Bovine	Milk	Portugal	2012	Diseased	Mastitis	554	CC67	II		Alp4		gbs2018c	Allele2	rsp-profile 1
VSA93	SAMEA3888245	GCF_900074385.1	Bovine	Milk	Portugal	2012	Diseased	Mastitis	61	CC67	II		Alp4		gbs2018c	Allele2	rsp-profile 1
VSA94	SAMEA3888246	GCF_900074445.1	Bovine	Milk	Portugal	2012	Diseased	Mastitis	61	CC67	II		Alp4		gbs2018c	Allele2	rsp-profile 1
VSA95	SAMEA3888247	GCF_900074405.1	Bovine	Milk	Portugal	2012	Diseased	Mastitis	61	CC67	nt		Alp4		gbs2018c	Allele2	rsp-profile 1
VSA96	SAMEA3888248	GCF_900074455.1	Bovine	Milk	Portugal	2012	Diseased	Mastitis	61	CC67	II		Alp4		gbs2018c	Allele2	rsp-profile 1
VSA97	SAMEA3888249	GCF_900074425.1	Bovine	Milk	Portugal	2013	Diseased	Mastitis	554	CC67	II		Alp4		gbs2018c	Allele2	rsp-profile 1
VSA98	SAMEA3888250	GCF_900074415.1	Bovine	Milk	Portugal	2013	Diseased	Mastitis	61	CC67	II		Alp4		gbs2018c	Allele2	rsp-profile 1
VSA99	SAMEA3888251	GCF_900074435.1	Bovine	Milk	Portugal	2013	Diseased	Mastitis	554	CC67	II		Alp4		gbs2018c	Allele2	rsp-profile 1
VSA100	SAMEA3888252	GCF_900073825.1	Bovine	Milk	Portugal	2012	Diseased	Mastitis	554	CC67	II	PI-2b	Alp4		gbs2018c	Allele2	rsp-profile 1
VSA101	SAMEA3888253	GCF_900073835.1	Bovine	Milk	Portugal	2012	Diseased	Mastitis	554	CC67	II	PI-2b	Alp4		gbs2018c	Allele2	rsp-profile 1
VSA102	SAMEA3888254	GCF_900073845.1	Bovine	Milk	Portugal	2013	Diseased	Mastitis	554	CC67	II	PI-2b	Alp4		gbs2018c	Allele2	rsp-profile 1
VSA103	SAMEA3888255	GCF_900073865.1	Bovine	Milk	Portugal	2012	Diseased	Mastitis	554	CC67	II	PI-2b	Alp4		gbs2018c	Allele2	rsp-profile 1
VSA104	SAMEA3888256	GCF_900073855.1	Bovine	Milk	Portugal	2013	Diseased	Mastitis	554	CC67	II	PI-2b	Alp4		gbs2018c	Allele2	rsp-profile 1
VSA105	SAMEA3888257	GCF_900073875.1	Bovine	Milk	Portugal	2012	Diseased	Mastitis	554	CC67	II	PI-2b	Alp4		gbs2018c	Allele2	rsp-profile 1
VSA106	SAMEA3888258	GCF_900073885.1	Bovine	Milk	Portugal	2012	Diseased	Mastitis	554	CC67	II	PI-2b	Alp4		gbs2018c	Allele2	rsp-profile 1
VSA107	SAMEA3888259	GCF_900073905.1	Bovine	Milk	Portugal	2012	Diseased	Mastitis	554	CC67	II	PI-2b	Alp4		gbs2018c	Allele2	rsp-profile 1
VSA108	SAMEA3888260	GCF_900073895.1	Bovine	Milk	Portugal	2012	Diseased	Mastitis	554	CC67	II	PI-2b	Alp4		gbs2018c	Allele2	rsp-profile 1
VSA109	SAMEA3888261	GCF_900073915.1	Bovine	Milk	Portugal	2012	Diseased	Mastitis	554	CC67	II	PI-2b	Alp4		gbs2018c	Allele2	rsp-profile 1
VSA110	SAMEA3888262	GCF_900073955.1	Bovine	Milk	Portugal	2012	Diseased	Mastitis	554	CC67	II	PI-2b	Alp4		gbs2018c	Allele2	rsp-profile 1
VSA111	SAMEA3888263	GCF_900073935.1	Bovine	Milk	Portugal	2013	Diseased	Mastitis	554	CC67	II	PI-2b	Alp4		gbs2018c	Allele2	rsp-profile 1
VSA112	SAMEA3888264	GCF_900073925.1	Bovine	Milk	Portugal	2012	Diseased	Mastitis	554	CC67	II	PI-2b	Alp4		gbs2018c	Allele2	rsp-profile 1
VSA113	SAMEA3888265	GCF_900073945.1	Bovine	Milk	Portugal	2013	Diseased	Mastitis	554	CC67	II	PI-2b	Alp4		gbs2018c	Allele2	rsp-profile 1
VSA114	SAMEA3888266	GCF_900073965.1	Bovine	Milk	Portugal	2013	Diseased	Mastitis	554	CC67	II	PI-2b	Alp4		gbs2018c	Allele2	rsp-profile 1
VSA115	SAMEA3888267	GCF_900073975.1	Bovine	Milk	Portugal	2012	Diseased	Mastitis	554	CC67	II	PI-2b	Alp4		gbs2018c	Allele2	rsp-profile 1
VSA116	SAMEA3888268	GCF_900073985.1	Bovine	Milk	Portugal	2012	Diseased	Mastitis	61	CC67	II	PI-2b	Alp4		gbs2018c	Allele2	rsp-profile 1
VSA117	SAMEA3888269	GCF_900073995.1	Bovine	Milk	Portugal	2012	Diseased	Mastitis	554	CC67	nt	PI-2b	Alp4		gbs2018c	Allele2	rsp-profile 1
VSA118	SAMEA3888270	GCF_900074005.1	Bovine	Milk	Portugal	2012	Diseased	Mastitis	554	CC67	II	PI-2b	Alp4		gbs2018c	Allele2	rsp-profile 1
VSA119	SAMEA3888271	GCF_900074015.1	Bovine	Milk	Portugal	2013	Diseased	Mastitis	61	CC67	II	PI-2b	Alp4		gbs2018c	Allele2	rsp-profile 1
VSA121	SAMEA3888272	GCF_900074025.1	Bovine	Milk	Portugal	2011	Diseased	Mastitis	61	CC67	II	PI-2b	Alp4		gbs2018c	Allele2	rsp-profile 1
VSA10	SAMEA3888273	GCF_900073805.1	Bovine	Milk	Portugal	2002	Diseased	Mastitis	2	CC1	II	PI-2a	Epsilon		gbs2018a	Allele1	rsp-profile 3
VSA76	SAMEA3888274	GCF_900074235.1	Bovine	Milk	Portugal	2012	Diseased	Mastitis	2	CC1	II	PI-1 and PI-2a	Epsilon		gbs2018a	Allele1	rsp-profile 3
mad3	SAMEA3888275	GCF_900074555.1	Bovine	Milk	Spain	2005-2006	Diseased	Mastitis	2	CC1	II	PI-2a	Epsilon		gbs2018a	Allele1	rsp-profile 3
mad11	SAMEA3888276	GCF_900074495.1	Bovine	Milk	Spain	2005-2006	Diseased	Mastitis	2	CC1	II	PI-2a	Epsilon		gbs2018a	Allele1	rsp-profile 3
mad12	SAMEA3888277	GCF_900074465.1	Bovine	Milk	Spain	2005-2006	Diseased	Mastitis	2	CC1	II	PI-2a	Epsilon		gbs2018a	Allele1	rsp-profile 3
mad15	SAMEA3888279	GCF_900074475.1	Bovine	Milk	Spain	2005-2006	Diseased	Mastitis	2	CC1	II	PI-2a	Epsilon		gbs2018a	Allele1	rsp-profile 3
mad24	SAMEA3888280	GCF_900074505.1	Bovine	Milk	Spain	2005-2006	Diseased	Mastitis	2	CC1	II	PI-2a	Epsilon		gbs2018a	Allele1	rsp-profile 3
mad25	SAMEA3888281	GCF_900074525.1	Bovine	Milk	Spain	2005-2006	Diseased	Mastitis	2	CC1	II	PI-2a	Epsilon		gbs2018a	Allele1	rsp-profile 3
mad29	SAMEA3888282	GCF_900074515.1	Bovine	Milk	Spain	2005-2006	Diseased	Mastitis	2	CC1	nt	PI-2a	Epsilon		gbs2018a	Allele1	rsp-profile 3
mad33	SAMEA3888283	GCF_900074545.1	Bovine	Milk	Spain	2005-2006	Diseased	Mastitis	2	CC1	II	PI-2a	Epsilon		gbs2018a	Allele1	rsp-profile 3
mad34	SAMEA3888284	GCF_900074535.1	Bovine	Milk	Spain	2005-2006	Diseased	Mastitis	2	CC1	nt	PI-2a	Epsilon		gbs2018a	Allele1	rsp-profile 3
mad35	SAMEA3888285	GCF_900074565.1	Bovine	Milk	Spain	2005-2006	Diseased	Mastitis	2	CC1	II	PI-2a	Epsilon		gbs2018a	Allele1	rsp-profile 3
mad40	SAMEA3888286	GCF_900074575.1	Bovine	Milk	Spain	2005-2006	Diseased	Mastitis	2	CC1	II	PI-2a	Epsilon		gbs2018a		rsp-profile 3
mad42	SAMEA3888287	GCF_900074585.1	Bovine	Milk	Spain	2005-2006	Diseased	Mastitis	2	CC1	II	PI-2a			gbs2018a	Allele1	rsp-profile 3
mad43	SAMEA3888288	GCF_900074595.1	Bovine	Milk	Spain	2005-2006	Diseased	Mastitis	2	CC1	II	PI-2a	Epsilon		gbs2018a		rsp-profile 3
mad44	SAMEA3888289	GCF_900074605.1	Bovine	Milk	Spain	2005-2006	Diseased	Mastitis	2	CC1	II	PI-2a	Epsilon		gbs2018a		rsp-profile 3
mad53	SAMEA3888290	GCF_900074615.1	Bovine	Milk	Spain	2005-2006	Diseased	Mastitis	2	CC1	II	PI-2a	Epsilon		gbs2018a		rsp-profile 3
mad60	SAMEA3888291	GCF_900074655.1	Bovine	Milk	Spain	2005-2006	Diseased	Mastitis	2	CC1	II	PI-2a	Epsilon		gbs2018a		rsp-profile 3
ATCC13813	SAMN00217013	GCF_000186445.1	Human	Oral			Healthy		61	CC67	II	PI-2b				Allele2	rsp-profile 14
BV3L5	SAMN00829147	GCF_000510405.1	Human	Vaginal-rectal					110	CC19	V	PI-2a	Rib	Allele2	gbs2018b	Other	rsp-profile 6
CCUG37736	SAMN00991056	GCF_000310605.1	Human	Blood	Sweden	1991	Diseased	Sepsis	17	CC17	III	PI-1 and PI-2b	Rib	Allele2	gbs2018e	Allele4	rsp-profile 2
CCUG37737	SAMN00991057	GCF_000288755.1	Human	Blood	Sweden	1993	Diseased	Sepsis	19	CC19	III	PI-1 and PI-2a	Rib	Allele1	gbs2018b	Other	rsp-profile 6
CCUG24810	SAMN00991059	GCF_000288695.1	Human	Ear	Sweden	1989	Healthy		19	CC19	III	PI-1 and PI-2a	Rib	Allele1	gbs2018b	Allele1	rsp-profile 6
CCUG25532	SAMN00991060	GCF_000288715.1	Human	Blood	Sweden: Gteb	1989	Diseased	Sepsis	26	ST26	V	PI-2a		Allele2	gbs2018f	Other	rsp-profile 4
CCUG29782	SAMN00991062	GCF_000310485.1	Human	Blood	Czech Republic: Prague	1992	Diseased	Sepsis	23	CC23	III	PI-1 and PI-2a	Alp2/3	Allele1	gbs2018b	Allele1	rsp-profile 4
CCUG37430	SAMN00991063	GCF_000288735.1	Human	Urine	Sweden	1997			19	CC19	II	PI-2a	Rib	Allele2	gbs2018b	Allele1	rsp-profile 6
CCUG29376	SAMN00991064	GCF_000311525.1	Human	Blood	Sweden	1991	Diseased	EOD	12	CC10	Ib	PI-1 and PI-2a	AlphaC	Allele1	gbs2018a	Allele3	rsp-profile 8
CCUG30636	SAMN00991065	GCF_000311545.1	Human	Vaginal	Sweden	1992			1	CC1	V	PI-1 and PI-2a	Alp2/3	Allele1	gbs2018a	Allele1	rsp-profile 3
CCUG17336	SAMN00991066	GCF_000311185.1	Human	Blood	Sweden	1985	Diseased	Sepsis	17	CC17	III	PI-1 and PI-2b	Rib	Allele2	gbs2018e	Allele4	rsp-profile 2
CCUG19094	SAMN00991067	GCF_000288675.1	Human	Blood	Sweden	1986	Diseased	Sepsis	19	CC19	III	PI-1 and PI-2a	Rib	Allele1	gbs2018b	Allele1	rsp-profile 6
FSLS3-137	SAMN00991069	GCF_000311485.1	Human	Joint	USA: NY Schoharie County	2000	Diseased	Adult invasive disease	8	CC10	Ib	PI-1 and PI-2a	AlphaC	Allele1	gbs2018a	Allele3	rsp-profile 5
FSLF2-338	SAMN00991070	GCF_000322625.1	Human	Blood	USA: NY Livingston County	2000	Diseased	Adult invasive disease	SLV22	ST22	II	PI-2a	AlphaC	Allele1		Allele7	rsp-profile 4
FSLS3-005	SAMN00991071	GCF_000310465.1	Human	Blood	USA: NY Monroe County	2000	Diseased	Adult invasive disease	22	ST22	II	PI-2a	AlphaC	Allele1	gbs2018a	Allele7	rsp-profile 4
FSLS3-001	SAMN00991072	GCF_000311505.1	Human	Blood	USA: NY Orleans County	2000	Diseased	Adult invasive disease	1	CC1	V	PI-1 and PI-2a	Alp2/3	Allele1	gbs2018a	Allele1	rsp-profile 3
FSLS3-003	SAMN00991073	GCF_000289915.1	Human	Blood	USA: NY Genesee County	2000	Diseased	Adult invasive disease	19	CC19	III	PI-1 and PI-2a	Rib	Allele1	gbs2018b	Allele1	rsp-profile 6
CCUG91	SAMN00991074	GCF_000311165.1	Human	Cerebrospinal fluid	Sweden	1968	Diseased		28	CC19	II	PI-1 and PI-2a	Rib	Allele2	gbs2018b	Allele1	rsp-profile 6
FSLS3-268	SAMN00991075	GCF_000311145.1	Human	Blood	USA: NY Ontario County	2000	Diseased	Adult invasive disease	22	ST22	II	PI-2a	AlphaC	Allele1	gbs2018a	Allele7	rsp-profile 4
FSLS3-102	SAMN00991076	GCF_000310445.1	Human	Blood	USA: NY Montgomery County	2000	Diseased	Adult invasive disease	31	CC17	III	PI-1 and PI-2b	Rib	Allele2	gbs2018e	Allele4	rsp-profile 2
FSLF2-343	SAMN00991077	GCF_000289875.1	Human	Blood	USA: NY Columbia County	2000	Diseased	Adult invasive disease	88	CC23	Ia	PI-1 and PI-2a	Alp2/3	Allele1	gbs2018b	Allele6	rsp-profile 9
FSLS3-014	SAMN00991078	GCF_000310745.1	Human	Blood	USA: NY Rensselaer County	2000	Diseased	Adult invasive disease	8	CC10	Ib	PI-1 and PI-2a	AlphaC	Allele1	gbs2018a	Allele3	rsp-profile 5
FSLS3-442	SAMN00991079	GCF_000311125.1	Human		USA: NY Columbia County	2000	Diseased	Adult invasive disease	12	CC10	nt	PI-1 and PI-2a	AlphaC	Allele1	gbs2018a	Allele3	rsp-profile 5
FSLS3-090	SAMN00991080	GCF_000310725.1	Human	Blood	USA: NY Monroe County	2000	Diseased	Adult invasive disease	23	CC23	Ia	PI-2a	Epsilon	Allele1	gbs2018b	Allele5	rsp-profile 4
FSLS3-023	SAMN00991082	GCF_000311465.1	Human	Blood	USA: NY Greene County	2000	Diseased	Adult invasive disease	1	CC1	V	PI-1 and PI-2a	Alp2/3		gbs2018a	Allele1	rsp-profile 3
FSLS3-337	SAMN00991083	GCF_000289855.1	Human	Blood	USA: NY Schenectady County	2000	Diseased	Adult invasive disease	19	CC19	III	PI-1 and PI-2a		Allele1	gbs2018b	Allele1	rsp-profile 6
LMG15085	SAMN00991085	GCF_000288915.1	Human		Belgium	1994			17	CC17	III	PI-1 and PI-2b	Rib	Allele2	gbs2018e	Allele4	rsp-profile 2
LMG15089	SAMN00991086	GCF_000311265.1	Human		Belgium	1994	Diseased	Urinary infection	19	CC19	III	PI-1 and PI-2a	Rib	Allele1	gbs2018b	Allele1	rsp-profile 6
CCUG49086	SAMN00991088	GCF_000311645.1	Human	Blood	Sweden	1998	Diseased	Sepsis Neonatal	17	CC17	III	PI-1 and PI-2b	Rib	Allele2	gbs2018e	Allele4	rsp-profile 2
CCUG49100	SAMN00991089	GCF_000310785.1	Human	Synovial fluid	Sweden	1998	Diseased		1	CC1	V	PI-1 and PI-2a	Alp2/3	Allele1	gbs2018a	Allele1	rsp-profile 3
CCUG44140	SAMN00991090	GCF_000311585.1	Human	Vaginal-rectal	Sweden	1999	Healthy		1	CC1	V	PI-1 and PI-2a	Alp2/3	Allele1	gbs2018a	Allele1	rsp-profile 3
LMG15081	SAMN00991091	GCF_000310805.1	Human		Belgium	1994			25	CC23	Ia	PI-1 and PI-2a	Alp2/3	Allele1	gbs2018b	Allele6	rsp-profile 4
LMG15083	SAMN00991092	GCF_000310825.1	Human		Belgium	1994			7	CC7	Ia	PI-1 and PI-2b	AlphaC	Allele1	gbs2018a	Allele3	rsp-profile 5
LMG15084	SAMN00991093	GCF_000310845.1	Human	Throat	Belgium	1994			19	CC19	II	PI-1 and PI-2a	Rib	Allele2	gbs2018b	Allele1	rsp-profile 6
CCUG44110	SAMN00991094	GCF_000310525.1	Human	Vaginal-rectal	Sweden	1999	Healthy		88	CC23	Ia	PI-1 and PI-2a	Alp2/3	Allele1	gbs2018b	Allele6	rsp-profile 9
CCUG49072	SAMN00991095	GCF_000311625.1	Human	Blood	Sweden: Uddevalla	1998	Diseased	Sepsis	524	CC1	V	PI-1 and PI-2a	Alp2/3	Allele1	gbs2018a	Allele1	rsp-profile 3
CCUG49087	SAMN00991096	GCF_000288895.1	Human	Blood & Cerebrospinal fluid	Sweden	1998	Diseased	Sepsis	17	CC17	III	PI-1 and PI-2b	Rib	Allele2	gbs2018e	Allele4	rsp-profile 2
CCUG44186	SAMN00991097	GCF_000311245.1	Human	Vaginal-rectal	Sweden	2000			17	CC17	III	PI-1 and PI-2b	Rib	Allele2	gbs2018e	Allele4	rsp-profile 2
CCUG47293	SAMN00991098	GCF_000310765.1	Human	Vaginal-rectal	Sweden: Boras	2003	Diseased	Abscess	SLV9	CC10	Ib	PI-1 and PI-2a	AlphaC	Allele1	gbs2018a	Allele3	rsp-profile 5
CCUG45061	SAMN00991099	GCF_000311605.1	Human	Blood	Norway: Tromso	2001	Diseased	Sepsis Neonatal	19	CC19	III	PI-1 and PI-2a	Rib	Allele1	gbs2018b	Other	rsp-profile 6
CCUG44104	SAMN00991101	GCF_000311225.1	Human	Vaginal-rectal	Sweden	1999	Healthy		19	CC19	III	PI-1 and PI-2a	Rib	Allele1	gbs2018b	Allele1	rsp-profile 34
CCUG44074	SAMN00991102	GCF_000310505.1	Human	Vaginal-rectal	Sweden	1999	Healthy		23	CC23	Ia	PI-2a	Epsilon	Allele1	gbs2018b	Allele5	rsp-profile 4
CCUG39096A	SAMN00991104	GCF_000288855.1	Human	Urine	Sweden	1998			9	CC10	Ib	PI-1 and PI-2a	AlphaC	Allele1	gbs2018a	Allele3	rsp-profile 5
CCUG37741	SAMN00991108	GCF_000288795.1	Human	Blood	Sweden	1996	Diseased	Sepsis	19	CC19	III	PI-1 and PI-2a	Rib	Allele1	gbs2018b	Allele1	rsp-profile 6
CCUG37738	SAMN00991109	GCF_000288775.1	Human	Blood	Sweden	1994	Diseased	Sepsis	19	CC19	III	PI-1 and PI-2a		Allele1	gbs2018b	Allele1	rsp-profile 6
CCUG37739	SAMN00991110	GCF_000311565.1	Human	Blood	Sweden	1995	Diseased	Sepsis	23	CC23	Ia	PI-2a	Epsilon	Allele1	gbs2018b	Allele5	rsp-profile 29
CCUG37740	SAMN00991111	GCF_000311005.1	Human	Synovial fluid	Sweden	1996	Diseased	Arthritis	1	CC1	V	PI-1 and PI-2a	Alp2/3	Allele1	gbs2018a	Allele1	rsp-profile 3
CCUG37742	SAMN00991112	GCF_000288815.1	Human	Blood	Sweden	1996	Diseased	Sepsis	19	CC19	III	PI-1 and PI-2a	Rib	Allele1	gbs2018b	Allele1	rsp-profile 6
BSU253	SAMN00991114	GCF_000311705.1							23	CC23	Ia	PI-2a	Epsilon	Allele1	gbs2018b	Allele5	rsp-profile 4
BSU247	SAMN00991115	GCF_000289895.1	Human						26	ST26	V	PI-2a		Allele2	gbs2018f	Other	rsp-profile 41
BSU447	SAMN00991116	GCF_000310885.1	Human						19	CC19	III	PI-1 and PI-2a	Rib	Allele1	gbs2018b	Allele1	rsp-profile 6
BSU248	SAMN00991117	GCF_000311685.1	Human						12	CC10	Ib	PI-1 and PI-2a	AlphaC	Allele1	gbs2018a	Allele3	rsp-profile 5
BSU442	SAMN00991118	GCF_000289055.1	Human						22	ST22	II	PI-2a	AlphaC	Allele1	gbs2018a	Allele7	rsp-profile 4
BSU252	SAMN00991119	GCF_000310865.1							1	CC1	V	PI-1 and PI-2a	Alp2/3	Allele1	gbs2018a	Allele1	rsp-profile 3
BSU454	SAMN00991120	GCF_000311665.1							8	CC10	Ib	PI-1 and PI-2a	AlphaC	Allele1	gbs2018a		rsp-profile 5
BSU450	SAMN00991121	GCF_000289035.1	Human						10	CC10	Ib	PI-1 and PI-2a	AlphaC	Allele1	gbs2018a	Allele3	rsp-profile 5
LMG15094	SAMN00991122	GCF_000288995.1	Human		Belgium	1994	Diseased	Urinary infection	17	CC17	III	PI-1 and PI-2b	Rib	Allele2	gbs2018e	Allele4	rsp-profile 2
LMG15095	SAMN00991123	GCF_000289015.1	Human		Belgium	1994	Diseased	Respiratory infection	17	CC17	III	PI-1 and PI-2b	Rib	Allele2	gbs2018e	Allele4	rsp-profile 2
LMG15090	SAMN00991124	GCF_000310545.1	Human		Belgium	1994	Diseased	Urinary infection	8	CC10	Ib	PI-1 and PI-2a	AlphaC	Allele1	gbs2018a	Other	rsp-profile 5
LMG15092	SAMN00991125	GCF_000288955.1	Human	Vaginal-rectal	Belgium	1994			2	CC1	II	PI-2a	Epsilon	Allele2	gbs2018a	Allele1	rsp-profile 6
Gottschalk1002A	SAMN00991126	GCF_000310405.1	Human	Vaginal-rectal	Canada: Quebec	1996/1997	Healthy		23	CC23	Ia	PI-2a	Epsilon	Allele1	gbs2018b	Other	rsp-profile 4
LMG15091	SAMN00991128	GCF_000288935.1	Human		Belgium	1994	Diseased	Urinary infection	291	CC17	IV	PI-1 and PI-2b	Rib	Allele2	gbs2018e	Allele4	rsp-profile 2
BSU108	SAMN00991130	GCF_000290015.1	Human						SLV226	CC103	Ia	PI-2b	Epsilon		gbs2018a	Other	rsp-profile 47
BSU451	SAMN00991131	GCF_000311385.1	Human						103	CC103	Ia	PI-2b	AlphaC		gbs2018a	Other	rsp-profile 4
BSU96	SAMN00991132	GCF_000289955.1							17	CC17	III	PI-1 and PI-2b	Rib	Allele2	gbs2018e	Allele4	rsp-profile 2
BSU165	SAMN00991133	GCF_000289975.1	Human						28	CC19	II	PI-1 and PI-2a	Rib	Allele2	gbs2018b	Allele1	rsp-profile 6
BSU174	SAMN00991134	GCF_000310625.1							41	CC7	V	PI-2a	Rib	Allele1	gbs2018a	Allele3	rsp-profile 5
BSU92	SAMN00991135	GCF_000289995.1	Human						196	CC459	IV	PI-1 and PI-2b	Epsilon	Allele1	gbs2018a	Other	rsp-profile 7
BSU133	SAMN00991136	GCF_000311405.1							6	CC7	Ib	PI-2a	AlphaC	Allele1	gbs2018a	Allele3	rsp-profile 46
BSU178	SAMN00991137	GCF_000289075.1	Human						7	CC7	Ia	PI-1 and PI-2b	AlphaC	Allele1	gbs2018a	Allele3	rsp-profile 5
BSU260	SAMN00991138	GCF_000311365.1	Human						88	CC23	Ia	PI-1 and PI-2a	Alp2/3	Allele1	gbs2018b	Allele6	rsp-profile 9
Gottschalk999B	SAMN00991139	GCF_000310985.1	Human	Vaginal-rectal	Canada: Quebec	1996/1997	Healthy		8	CC10	Ib	PI-1 and PI-2a	AlphaC	Allele1	gbs2018a	Allele3	rsp-profile 5
Gottschalk998A	SAMN00991140	GCF_000310965.1	Human	Vaginal-rectal	Canada: Quebec	1996/1997	Healthy		12	CC10	Ib	PI-1 and PI-2a	AlphaC	Allele1	gbs2018a	Allele3	rsp-profile 8
Gottschalk31825	SAMN00991143	GCF_000311445.1	Human	Vaginal-rectal	Canada: Quebec	1996/1997	Healthy		23	CC23	Ia	PI-2a	Epsilon	Allele1	gbs2018b	Allele5	rsp-profile 4
Gottschalk13227	SAMN00991144	GCF_000311085.1	Human	Vaginal-rectal	Canada: Quebec	1996/1997	Healthy		SLV1	CC1	V	PI-1 and PI-2a	Alp2/3	Allele1	gbs2018a	Allele1	rsp-profile 3
Gottschalk1005B	SAMN00991146	GCF_000289435.1	Human	Vaginal-rectal	Canada: Quebec	1996/1997	Healthy		288	CC4	IV	PI-1 and PI-2a	AlphaC	Allele1	gbs2018a	Allele1	rsp-profile 36
GB00202	SAMN00991147	GCF_000289515.1	Human	Vaginal-rectal	Canada: Alberta	1998-2000	Healthy		10	CC10	Ib	PI-1 and PI-2a	AlphaC	Allele1	gbs2018a	Allele3	rsp-profile 44
GB00206	SAMN00991148	GCF_000289535.1	Human	Vaginal-rectal	Canada: Alberta	1998-2000	Healthy		19	CC19	Ia	PI-1 and PI-2a	Rib	Allele2	gbs2018b	Allele1	rsp-profile 6
GB00092	SAMN00991149	GCF_000290055.1	Human	Vaginal-rectal	Canada: Alberta	1998-2000	Healthy		19	CC19	III	PI-1 and PI-2a	Rib	Allele1	gbs2018b	Allele1	rsp-profile 6
GB00097	SAMN00991150	GCF_000289495.1	Human	Vaginal-rectal	Canada: Alberta	1998-2000	Healthy		17	CC17	III	PI-1 and PI-2b	Rib		gbs2018e	Allele4	rsp-profile 2
GB00111	SAMN00991151	GCF_000290075.1	Human	Vaginal-rectal	Canada: Alberta	1998-2000	Healthy		32	CC17	III	PI-1 and PI-2b	Rib	Allele2	gbs2018e	Allele4	rsp-profile 2
GB00115	SAMN00991152	GCF_000290095.1	Human	Vaginal-rectal	Canada: Alberta	1998-2000	Healthy		17	CC17	III	PI-1 and PI-2b	Rib	Allele2	gbs2018e	Allele4	rsp-profile 2
GB00190	SAMN00991153	GCF_000290135.1	Human	Vaginal-rectal	Canada: Alberta	1998-2000	Healthy		23	CC23	Ia	PI-2a	Epsilon	Allele1	gbs2018b	Allele5	rsp-profile 4
Gottschalk1003A	SAMN00991154	GCF_000288075.1	Human	Vaginal-rectal	Canada: Quebec	1996/1997	Healthy		19	CC19	III	PI-1 and PI-2a	Rib	Allele1	gbs2018b	Allele1	rsp-profile 35
GB00174	SAMN00991155	GCF_000290115.1	Human	Vaginal-rectal	Canada: Alberta	1998-2000	Healthy		22	ST22	II	PI-2a	AlphaC	Allele1	gbs2018a	Allele7	rsp-profile 4
GB00083	SAMN00991156	GCF_000288255.1	Human	Vaginal-rectal	Canada: Alberta	1998-2000	Healthy		1	CC1	VI	PI-1 and PI-2a	AlphaC	Allele1	gbs2018c	Allele1	rsp-profile 6
GB00084	SAMN00991157	GCF_000290035.1	Human	Vaginal-rectal	Canada: Alberta	1998-2000	Healthy		1	CC1	VIII	PI-1 and PI-2b	Alp2/3	Allele1	gbs2018a	Allele1	rsp-profile 6
GB00003	SAMN00991158	GCF_000288155.1	Human	Vaginal-rectal	Canada: Alberta	1998-2000	Healthy		12	CC10	Ib	PI-2a	AlphaC	Allele1	gbs2018a	Allele3	rsp-profile 8
GB00012	SAMN00991159	GCF_000288135.1	Human	Vaginal-rectal	Canada: Alberta	1998-2000	Healthy		1	CC1	V	PI-1 and PI-2a	Alp2/3	Allele1	gbs2018a	Allele1	rsp-profile 3
GB00018	SAMN00991160	GCF_000288115.1	Human	Vaginal-rectal	Canada: Alberta	1998-2000	Healthy		444	CC23	Ia	PI-2a	Epsilon	Allele1	gbs2018b	Allele5	rsp-profile 4
GB00082	SAMN00991161	GCF_000288215.1	Human	Vaginal-rectal	Canada: Alberta	1998-2000	Healthy		2	CC1	IV	PI-1 and PI-2a	Epsilon	Allele1	gbs2018a	Other	rsp-profile 3
GB00013	SAMN00991162	GCF_000288095.1	Human	Vaginal-rectal	Canada: Alberta	1998-2000	Healthy		1	CC1	V	PI-1 and PI-2a	Alp2/3	Allele1	gbs2018a	Allele1	rsp-profile 3
GB00020	SAMN00991163	GCF_000288235.1	Human	Vaginal-rectal	Canada: Alberta	1998-2000	Healthy		1	CC1	V	PI-1 and PI-2a	Alp2/3	Allele1	gbs2018a	Allele1	rsp-profile 3
GB00002	SAMN00991164	GCF_000289475.1	Human	Vaginal-rectal	Canada: Alberta	1998-2000	Healthy		23	CC23	Ia	PI-2a	Epsilon	Allele1	gbs2018b	Allele5	rsp-profile 4
GB00865	SAMN00991165	GCF_000290495.1	Human	Vaginal-rectal	USA:MI	2006	Healthy		19	CC19	III	PI-1 and PI-2a	Rib	Allele1	gbs2018b	Allele1	rsp-profile 6
GB00864	SAMN00991166	GCF_000290455.1	Human	Vaginal-rectal	USA:MI	2006	Healthy		10	CC10	II	PI-1 and PI-2a	AlphaC	Allele1	gbs2018a	Allele3	rsp-profile 5
GB00663	SAMN00991167	GCF_000290435.1	Human	Vaginal-rectal	Canada: Alberta	1998-2000	Healthy		19	CC19	III	PI-1 and PI-2a	Rib	Allele1	gbs2018b	Allele1	rsp-profile 6
GB00679	SAMN00991168	GCF_000290475.1	Human	Vaginal-rectal	Canada: Alberta	1998-2000	Healthy		2	CC1	II	PI-2a	Epsilon	Allele2	gbs2018a	Allele1	rsp-profile 6
GB00654	SAMN00991169	GCF_000290395.1	Human	Vaginal-rectal	Canada: Alberta	1998-2000	Healthy		17	CC17	III	PI-1 and PI-2b	Rib		gbs2018e	Allele4	rsp-profile 2
GB00651	SAMN00991170	GCF_000290375.1	Human	Vaginal-rectal	Canada: Alberta	1998-2000	Healthy		8	CC10	Ib	PI-1 and PI-2a	AlphaC	Allele1	gbs2018a	Other	rsp-profile 5
GB00653	SAMN00991171	GCF_000290415.1	Human	Vaginal-rectal	Canada: Alberta	1998-2000	Healthy		12	CC10	II	PI-1 and PI-2a	AlphaC	Allele1	gbs2018a	Allele3	rsp-profile 5
GB00640	SAMN00991172	GCF_000290355.1	Human	Vaginal-rectal	Canada: Alberta	1998-2000	Healthy		26	ST26	V	PI-2a		Allele2	gbs2018f	Other	rsp-profile 4
GB00614	SAMN00991173	GCF_000290335.1	Human	Vaginal-rectal	Canada: Alberta	1998-2000	Healthy		448	CC1	nt	PI-1 and PI-2a	Alp2/3	Allele1	gbs2018a	Allele1	rsp-profile 3
GB00601	SAMN00991174	GCF_000290315.1	Human	Vaginal-rectal	Canada: Alberta	1998-2000	Healthy		24	CC452	Ia	PI-2a	AlphaC	Allele1	gbs2018b	Allele5	rsp-profile 4
GB00588	SAMN00991175	GCF_000290295.1	Human	Vaginal-rectal	Canada: Alberta	1998-2000	Healthy		447	CC19	II	PI-1 and PI-2a	Rib	Allele2	gbs2018b	Allele1	rsp-profile 6
GB00557	SAMN00991176	GCF_000290255.1	Human	Vaginal-rectal	Canada: Alberta	1998-2000	Healthy		17	CC17	III	PI-1 and PI-2b	Rib	Allele2	gbs2018e	Allele4	rsp-profile 2
GB00561	SAMN00991177	GCF_000290275.1	Human	Vaginal-rectal	Canada: Alberta	1998-2000	Healthy		19	CC19	V	PI-1 and PI-2a	Rib	Allele2	gbs2018b	Allele1	rsp-profile 6
GB00555	SAMN00991178	GCF_000290235.1	Human	Vaginal-rectal	Canada: Alberta	1998-2000	Healthy		12	CC10	Ib	PI-1 and PI-2a	AlphaC	Other	gbs2018a	Allele3	rsp-profile 5
GB00543	SAMN00991179	GCF_000290175.1	Human	Vaginal-rectal	Canada: Alberta	1998-2000	Healthy		36	CC19	III	PI-1 and PI-2a	Rib	Allele1	gbs2018b	Allele1	rsp-profile 6
GB00264	SAMN00991180	GCF_000288315.1	Human	Vaginal-rectal	Canada: Alberta	1998-2000	Healthy		10	CC10	II	PI-1 and PI-2a	AlphaC	Allele1	gbs2018a	Allele3	rsp-profile 5
GB00279	SAMN00991181	GCF_000288355.1	Human	Vaginal-rectal	Canada: Alberta	1998-2000	Healthy		2	CC1	II	PI-2a	Epsilon	Allele2	gbs2018a	Allele1	rsp-profile 6
GB00300	SAMN00991182	GCF_000289575.1	Human	Vaginal-rectal	Canada: Alberta	1998-2000	Healthy		130	ST130	IX	PI-2a	AlphaC	Other	gbs2018a	Allele3	rsp-profile 4
GB00535	SAMN00991183	GCF_000290155.1	Human	Vaginal-rectal	Canada: Alberta	1998-2000	Healthy		8	CC10	Ib	PI-1 and PI-2a	AlphaC	Allele1	gbs2018a	Allele3	rsp-profile 45
GB00241	SAMN00991184	GCF_000288175.1	Human	Vaginal-rectal	Canada: Alberta	1998-2000	Healthy		1	CC1	V	PI-1 and PI-2a	Alp2/3	Allele1	gbs2018a	Allele1	rsp-profile 3
GB00226	SAMN00991185	GCF_000288195.1	Human	Vaginal-rectal	Canada: Alberta	1998-2000	Healthy		28	CC19	II	PI-1 and PI-2a	Rib	Allele2	gbs2018b	Allele1	rsp-profile 6
GB00245	SAMN00991186	GCF_000288335.1	Human	Vaginal-rectal	Canada: Alberta	1998-2000	Healthy		23	CC23	Ia	PI-2a	Epsilon	Allele1	gbs2018b	Allele5	rsp-profile 4
GB00247	SAMN00991187	GCF_000288275.1	Human	Vaginal-rectal	Canada: Alberta	1998-2000	Healthy		24	CC452	Ia	PI-2a	AlphaC	Allele1	gbs2018b	Allele5	rsp-profile 4
GB00219	SAMN00991188	GCF_000289555.1	Human	Vaginal-rectal	Canada: Alberta	1998-2000	Healthy		8	CC10	Ib	PI-1 and PI-2a	AlphaC	Allele1	gbs2018a	Allele3	rsp-profile 5
GB00929	SAMN00991362	GCF_000288515.1	Human	Vaginal-rectal	USA:MI	2006	Healthy		19	CC19	III	PI-1 and PI-2a	Rib	Allele1	gbs2018b	Allele1	rsp-profile 6
GB00932	SAMN00991363	GCF_000288535.1	Human	Vaginal-rectal	USA:MI	2006	Healthy		23	CC23	Ia	PI-2a	Epsilon	Allele1	gbs2018b	Allele5	rsp-profile 28
GB00947	SAMN00991364	GCF_000288575.1	Human	Vaginal-rectal	USA:MI	2006	Healthy		12	CC10	II	PI-1 and PI-2a	AlphaC	Allele1	gbs2018a	Other	rsp-profile 5
GB00975	SAMN00991367	GCF_000288635.1	Human	Vaginal-rectal	USA:MI	2006	Healthy		22	ST22	II	PI-2a	AlphaC	Allele1	gbs2018a	Allele7	rsp-profile 4
GB00984	SAMN00991368	GCF_000288655.1	Human	Vaginal-rectal	USA:MI	2006	Healthy		19	CC19	III	PI-1 and PI-2a	Rib	Allele1	gbs2018b	Allele1	rsp-profile 6
GB00891	SAMN00991405	GCF_000290215.1	Human	Vaginal-rectal	USA:MI	2006	Healthy		17	CC17	III	PI-1 and PI-2b	Rib	Allele2	gbs2018e	Allele4	rsp-profile 2
GB00887	SAMN00991406	GCF_000289655.1	Human	Vaginal-rectal	USA:MI	2006	Healthy		23	CC23	Ia	PI-2a	Epsilon	Allele1	gbs2018b	Allele5	rsp-profile 4
GB00888	SAMN00991407	GCF_000289675.1	Human	Vaginal-rectal	USA:MI	2006	Healthy		41	CC7	V	PI-1 and PI-2a	Rib	Allele1	gbs2018a	Allele3	rsp-profile 5
GB00914	SAMN00991426	GCF_000288455.1	Human	Vaginal-rectal	USA:MI	2006	Healthy		8	CC10	Ib	PI-1 and PI-2a	AlphaC	Allele1	gbs2018a	Allele3	rsp-profile 5
GB00922	SAMN00991427	GCF_000288435.1	Human	Vaginal-rectal	USA:MI	2006	Healthy		88	CC23	Ia	PI-1 and PI-2a	Alp2/3	Allele1	gbs2018b	Allele6	rsp-profile 9
GB00904	SAMN00991429	GCF_000288375.1	Human	Vaginal-rectal	USA:MI	2006	Healthy		19	CC19	III	PI-1 and PI-2a	Rib	Allele1	gbs2018b	Allele1	rsp-profile 6
GB00911	SAMN00991430	GCF_000288395.1	Human	Vaginal-rectal	USA:MI	2006	Healthy		452	CC452	IV	PI-2b	AlphaC	Allele2	gbs2018b	Allele5	rsp-profile 2
GB00867	SAMN00991431	GCF_000289595.1	Human	Vaginal-rectal	USA:MI	2006	Healthy		23	CC23	Ia	PI-2a	Epsilon	Allele1	gbs2018b	Allele5	rsp-profile 4
GB00884	SAMN00991432	GCF_000289635.1	Human	Vaginal-rectal	USA:MI	2006	Healthy		19	CC19	III	PI-1 and PI-2a	Rib	Allele1	gbs2018b	Allele1	rsp-profile 6
GB00955	SAMN00991433	GCF_000288595.1	Human	Vaginal-rectal	USA:MI	2006	Healthy		SLV1	CC1	V	PI-1 and PI-2a	Alp2/3	Allele1	gbs2018a	Other	rsp-profile 3
GB00959	SAMN00991434	GCF_000288615.1	Human	Vaginal-rectal	USA:MI	2006	Healthy		1	CC1	nt	PI-1 and PI-2a	Alp2/3	Allele1	gbs2018a	Allele1	rsp-profile 3
GB00923	SAMN00991435	GCF_000288475.1	Human	Vaginal-rectal	USA:MI	2006	Healthy		19	CC19	III	PI-1 and PI-2a	Rib	Allele1	gbs2018b	Allele1	rsp-profile 6
GB00924	SAMN00991436	GCF_000288495.1	Human	Vaginal-rectal	USA:MI	2006	Healthy		1	CC1	V	PI-1 and PI-2a	Alp2/3	Allele1	gbs2018a	Allele1	rsp-profile 3
GB00897	SAMN00991437	GCF_000290535.1	Human	Vaginal-rectal	USA:MI	2006	Healthy		12	CC10	Ib	PI-1 and PI-2a	AlphaC	Allele1	gbs2018a	Allele3	rsp-profile 5
GB00986	SAMN00991439	GCF_000289715.1	Human	Vaginal-rectal	USA:MI	2006	Healthy		23	CC23	nt	PI-2a	Epsilon	Allele1	gbs2018b	Allele5	rsp-profile 32
GB00933	SAMN00991447	GCF_000288555.1	Human	Vaginal-rectal	USA:MI	2006	Healthy		452	CC452	IV	PI-2b	AlphaC	Allele2	gbs2018b	Allele5	rsp-profile 2
GB00901	SAMN00991449	GCF_000288295.1	Human	Vaginal-rectal	USA:MI	2006	Healthy		459	CC459	IV	PI-1 and PI-2a	Epsilon	Allele1	gbs2018a	Allele1	rsp-profile 7
GB00909	SAMN00991450	GCF_000288415.1	Human	Vaginal-rectal	USA:MI	2006	Healthy		12	CC10	Ib	PI-1 and PI-2a	AlphaC	Allele1	gbs2018a	Allele3	rsp-profile 5
GB00874	SAMN00991451	GCF_000289615.1	Human	Vaginal-rectal	USA:MI	2006	Healthy		1	CC1	II	PI-1 and PI-2a	Alp2/3	Allele1	gbs2018a	Allele1	rsp-profile 3
FSLS3-105	SAMN00993313	GCF_000311105.1	Bovine	Milk	USA: NY Steuben County	2000	Diseased	Mastitis	SLV91	CC67	III	PI-2b	Epsilon		gbs2018d	Allele2	rsp-profile 1
MRIZ1-219	SAMN00993315	GCF_000310385.1	Bovine						590	CC10	II	PI-1 and PI-2a	AlphaC		gbs2018a	Allele3	rsp-profile 5
MRIZ1-217	SAMN00993316	GCF_000311325.1	Bovine						SLV591	CC67	II	PI-1 and PI-2b	Alp2/3			Allele2	rsp-profile 12
LDS617	SAMN00993319	GCF_000288035.1	Bovine						SLV61	CC67	nt	PI-2b				Allele2	rsp-profile 38
MRIZ1-218	SAMN00993320	GCF_000322845.1	Bovine						590	CC10	II	PI-1 and PI-2a	AlphaC		gbs2018a	Allele3	rsp-profile 5
MRIZ1-215	SAMN00993325	GCF_000311305.1	Bovine						589	CC1	IV	PI-1 and PI-2b	Epsilon	Allele1	gbs2018c	Allele1	rsp-profile 6
MRIZ1-211	SAMN00993326	GCF_000287955.1	Bovine						1	CC1	V	PI-1 and PI-2a	Alp2/3	Allele1	gbs2018a	Allele1	rsp-profile 3
FSLC1-494	SAMN00993327	GCF_000289755.1	Bovine	Milk	USA: NY Erie County	2000	Diseased	Mastitis	298	CC67	II	PI-2b			gbs2018d	Allele2	rsp-profile 1
MRIZ1-216	SAMN00993330	GCF_000289415.1	Bovine						591	CC67	II	PI-1 and PI-2b	Alp2/3			Allele2	rsp-profile 12
MRIZ1-214	SAMN00993331	GCF_000289395.1	Bovine						591	CC67	II	PI-1 and PI-2b	Alp2/3			Allele2	rsp-profile 12
MRIZ1-213	SAMN00993332	GCF_000289375.1	Bovine						591	CC67	II	PI-1 and PI-2b	Alp2/3			Allele2	rsp-profile 12
MRIZ1-209	SAMN00993333	GCF_000311045.1	Bovine						SLV1	CC1	V	PI-1 and PI-2a	Alp2/3	Allele1	gbs2018a	Allele1	rsp-profile 3
FSLS3-586	SAMN00993335	GCF_000310365.1	Bovine	Milk	USA: NY Wayne County	2001	Diseased	Mastitis	67	CC67	II	PI-2b	Alp4		gbs2018c	Allele2	rsp-profile 39
MRIZ1-025	SAMN00993338	GCF_000310945.1	Bovine						1	CC1	V	PI-1 and PI-2a	Alp2/3	Allele1	gbs2018a	Allele1	rsp-profile 3
MRIZ1-038	SAMN00993339	GCF_000289355.1	Bovine						296	CC10	Ib	PI-1 and PI-2a	AlphaC	Allele1	gbs2018a	Allele3	rsp-profile 5
MRIZ1-023	SAMN00993342	GCF_000311425.1	Bovine						103	CC103	Ia	PI-2b			gbs2018a	Other	rsp-profile 4
FSLC1-487	SAMN00993351	GCF_000310285.1	Bovine	Milk	USA	2000	Diseased	Mastitis	415	CC67	II	PI-2b			gbs2018d	Allele2	rsp-profile 1
STIR-CD-23	SAMN00993454	GCF_000289195.1	Fish						7	CC7	Ia	PI-1 and PI-2b	AlphaC		gbs2018a	Allele3	rsp-profile 5
MRIZ1-199	SAMN00993455	GCF_000310665.1	Seal						23	CC23	Ia	PI-2a		Allele1	gbs2018b	Allele5	rsp-profile 4
FSLS3-026	SAMN00993654	GCF_000310565.1	Bovine	Milk	USA: NY Albany County	2000	Diseased	Mastitis	67	CC67	III	PI-2b	Alp4		gbs2018c	Allele2	rsp-profile 59
STIR-CD-26	SAMN00993656	GCF_000310325.1	Fish						500	CC7	Ia	PI-1 and PI-2b	AlphaC		gbs2018a	Allele3	rsp-profile 5
STIR-CD-27	SAMN00993658	GCF_000289235.1	Fish						7	CC7	Ia	PI-1 and PI-2b	AlphaC		gbs2018a	Allele3	rsp-profile 5
STIR-CD-25	SAMN00993660	GCF_000311025.1	Fish						283	CC283	III	PI-1 and PI-2a	AlphaC	Allele1	gbs2018a	Allele3	rsp-profile 5
GB00893	SAMN00993715	GCF_000290515.1	Human	Vaginal-rectal	USA:MI	2006	Healthy		8	CC10	Ib	PI-1 and PI-2a	AlphaC	Allele1	gbs2018a	Allele3	rsp-profile 5
STIR-CD-22	SAMN00993718	GCF_000289175.1	Fish						7	CC7	Ia	PI-1 and PI-2b	AlphaC		gbs2018a	Allele3	rsp-profile 5
STIR-CD-14	SAMN00993722	GCF_000310305.1	Fish						491	CC283	III	PI-1 and PI-2a	AlphaC	Allele1	gbs2018a	Allele3	rsp-profile 5
STIR-CD-28	SAMN00993773	GCF_000289255.1	Fish						500	CC7	Ia	PI-1 and PI-2b	AlphaC		gbs2018a	Allele3	rsp-profile 5
STIR-CD-24	SAMN00993775	GCF_000289215.1	Fish						7	CC7	Ia	PI-1 and PI-2b	AlphaC		gbs2018a	Allele3	rsp-profile 5
MRIZ1-198	SAMN00993779	GCF_000310645.1	Dolphin						12	CC10	Ib	PI-1 and PI-2a	AlphaC	Allele1	gbs2018a	Allele3	rsp-profile 5
GB00112	SAMN01084069	GCF_000291585.1	Human	Vaginal-rectal	Canada: Calgary	1999	Healthy		17	CC17	III	PI-1 and PI-2b	Rib	Allele2	gbs2018e	Allele4	rsp-profile 2
GB00548	SAMN01091759	GCF_000290195.1	Human	Vaginal-rectal	Canada: Alberta	1998-2000	Healthy		88	CC23	Ia	PI-1 and PI-2a	Alp2/3	Allele1	gbs2018b	Allele6	rsp-profile 9
SGBS001	SAMN01774131	GCF_000454865.1	Human	Blood	USA	1993	Diseased	Adult invasive disease	1	CC1	V	PI-1 and PI-2a	Alp2/3	Allele1	gbs2018a	Allele1	rsp-profile 3
SGBS002	SAMN01774132	GCF_000454825.1	Human	Blood	USA	1993	Diseased	Adult invasive disease	1	CC1	V	PI-1 and PI-2a	Alp2/3	Allele1	gbs2018a	Allele1	rsp-profile 3
SGBS003	SAMN01774133	GCF_000454805.1	Human	Blood	USA	1994	Diseased	Adult invasive disease	1	CC1	V	PI-1 and PI-2a	Alp2/3	Allele1	gbs2018a	Allele1	rsp-profile 3
SGBS004	SAMN01774134	GCF_000454785.1	Human	Blood	USA	1995	Diseased	Adult invasive disease	1	CC1	V	PI-1 and PI-2a	Alp2/3	Allele1	gbs2018a	Allele1	rsp-profile 3
SGBS005	SAMN01774135	GCF_000454765.1	Human	Blood	USA	1996	Diseased	Adult invasive disease	1	CC1	V	PI-1 and PI-2a	Alp2/3	Allele1	gbs2018a	Allele1	rsp-profile 3
SGBS006	SAMN01774136	GCF_000454845.1	Human	Blood	USA	1998	Diseased	Adult invasive disease	1	CC1	V	PI-1 and PI-2a	Alp2/3	Allele1	gbs2018a	Allele1	rsp-profile 3
SGBS007	SAMN01774137	GCF_000455045.1	Human	Blood	USA	1997	Diseased	Adult invasive disease	1	CC1	V	PI-1 and PI-2a	Alp2/3	Allele1	gbs2018a	Allele1	rsp-profile 3
SGBS010	SAMN01774138	GCF_000455065.1	Human	Blood	USA	1999	Diseased	Adult invasive disease	SLV1	CC1	V	PI-1 and PI-2a	Alp2/3	Allele1	gbs2018a	Allele1	rsp-profile 3
SGBS014	SAMN01774139	GCF_000454885.1	Human	Blood	USA	2002	Diseased	Adult invasive disease	1	CC1	V	PI-1 and PI-2a	Alp2/3	Allele1	gbs2018a	Allele1	rsp-profile 3
SGBS015	SAMN01774140	GCF_000454905.1	Human	Blood	USA	2003	Diseased	Adult invasive disease	1	CC1	V	PI-1 and PI-2a	Alp2/3	Allele1	gbs2018a	Allele1	rsp-profile 3
SGBS016	SAMN01774141	GCF_000454925.1	Human	Blood	USA	2003	Diseased	Adult invasive disease	SLV1	CC1	V	PI-1 and PI-2a	Alp2/3	Allele1	gbs2018a	Allele1	rsp-profile 3
SGBS020	SAMN01774142	GCF_000454745.1	Human	Blood	USA	2006	Diseased	Adult invasive disease	1	CC1	V	PI-1 and PI-2a	Alp2/3	Allele1	gbs2018a	Allele1	rsp-profile 3
SGBS021	SAMN01774143	GCF_000454945.1	Human	Blood	USA	2007	Diseased	Adult invasive disease	1	CC1	V	PI-1 and PI-2a	Alp2/3	Allele1	gbs2018a	Allele1	rsp-profile 3
SGBS022	SAMN01774144	GCF_000454965.1	Human	Blood	USA	2008	Diseased	Adult invasive disease	1	CC1	V	PI-1 and PI-2a	Alp2/3	Allele1	gbs2018a	Allele1	rsp-profile 26
SGBS025	SAMN01774145	GCF_000455005.1	Human	Blood	USA	2010	Diseased	Adult invasive disease	1	CC1	V	PI-1 and PI-2a	Alp2/3	Allele1	gbs2018a	Allele1	rsp-profile 3
SGBS026	SAMN01774146	GCF_000454985.1	Human	Blood	USA	2011	Diseased	Adult invasive disease	1	CC1	V	PI-1 and PI-2a	Alp2/3	Allele1		Allele1	rsp-profile 3
SGBS027	SAMN01774147	GCF_000455085.1	Human	Blood	USA	2011	Diseased	Adult invasive disease	1	CC1	V	PI-1 and PI-2a	Alp2/3	Allele1	gbs2018a	Allele1	rsp-profile 3
SGBS029	SAMN01774148	GCF_000455105.1	Human	Blood	USA	2011	Diseased	Adult invasive disease	1	CC1	V	PI-1 and PI-2a	Alp2/3	Allele1	gbs2018a	Allele1	rsp-profile 3
SGBS030	SAMN01774149	GCF_000455025.1	Human	Blood	USA	2012	Diseased	Adult invasive disease	SLV1	CC1	V	PI-1 and PI-2a	Alp2/3	Allele1	gbs2018a	Allele1	rsp-profile 3
FSLS3-128	SAMN01888209	GCF_000323165.1	Bovine	Milk	USA: NY Onondaga County	2000	Diseased	Mastitis	SLV61	CC67	II	PI-2b			gbs2018d	Allele2	rsp-profile 1
FSLS3-229	SAMN01888210	GCF_000323125.1	Bovine	Milk	USA: NY Saratoga County	2000	Diseased	Mastitis	415	CC67	II	PI-2b			gbs2018d	Allele2	rsp-profile 1
FSLS3-222	SAMN01888211	GCF_000323105.1	Bovine	Milk	USA: NY Montgomery County	2000	Diseased	Mastitis	SLV61	CC67	II	PI-2b			gbs2018d	Allele2	rsp-profile 1
Gottschalk19247	SAMN02436186	GCF_000311065.1	Human	Vaginal-rectal	Canada: Quebec	1996/1997	Healthy		23	CC23	Ia	PI-2a	Epsilon	Allele1	gbs2018b	Allele5	rsp-profile 31
FSLS3-654	SAMN02436188	GCF_000322825.1	Bovine	Milk	USA: NY Chautauqua	2001	Diseased	Mastitis	61	CC67	II	PI-2b			gbs2018d	Allele2	rsp-profile 1
FSLS3-608	SAMN02436189	GCF_000322785.1	Bovine	Milk	USA: NY Chautauqua	2001	Diseased	Mastitis	490	CC67	II	PI-2b			gbs2018d		rsp-profile 1
MRIZ1-202	SAMN02436191	GCF_000322985.1	Seal						23	CC23	Ia	PI-2a		Allele1	gbs2018b	Allele5	rsp-profile 4
GB00940	SAMN02436193	GCF_000322885.1	Human	Vaginal-rectal	USA:MI	2006	Healthy		17	CC17	III	PI-1 and PI-2b	Rib	Allele2	gbs2018e	Allele4	rsp-profile 2
FSLS3-034	SAMN02436209	GCF_000322565.1	Bovine	Milk	USA: NY Wyoming County	2000	Diseased	Mastitis	61	CC67	II	PI-2b			gbs2018d	Allele2	rsp-profile 1
CCUG34230	SAMN02436210	GCF_000323085.1	Bovine		Germany: Braunschweig	1995	Diseased	Mastitis	23	CC23	III	PI-1 and PI-2a	Alp2/3		gbs2018b	Allele6	rsp-profile 4
MRIZ1-206	SAMN02436211	GCF_000322725.1	Dog						8	CC10	Ib	PI-1 and PI-2a	AlphaC		gbs2018a	Allele3	rsp-profile 5
MRIZ1-204	SAMN02436212	GCF_000323005.1	Dog						23	CC23	Ia	PI-2a	Epsilon	Allele1	gbs2018b	Allele5	rsp-profile 4
MRIZ1-200	SAMN02436213	GCF_000322525.1	Seal						23	CC23	Ia	PI-2a		Allele1	gbs2018b	Allele5	rsp-profile 4
GB00965	SAMN02436214	GCF_000322665.1	Human	Vaginal-rectal	USA:MI	2006	Healthy		88	CC23	Ia	PI-1 and PI-2a	Alp2/3	Allele1	gbs2018b	Allele6	rsp-profile 9
MRIZ1-201	SAMN02436251	GCF_000322545.1	Seal						23	CC23	Ia	PI-2a	Epsilon	Allele1	gbs2018b	Allele5	rsp-profile 4
GB01004	SAMN02436252	GCF_000322685.1	Human	Vaginal-rectal	USA:MI	2006	Healthy		22	ST22	II	PI-2a	AlphaC	Allele1	gbs2018a	Allele7	rsp-profile 4
GB00963	SAMN02436253	GCF_000322945.1	Human	Vaginal-rectal	USA:MI	2006	Healthy		17	CC17	III	PI-1 and PI-2b	Rib	Allele2	gbs2018e	Allele4	rsp-profile 2
GB00957	SAMN02436254	GCF_000322925.1	Human	Vaginal-rectal	USA:MI	2006	Healthy		23	CC23	Ia	PI-2a	Epsilon	Allele1	gbs2018b	Allele5	rsp-profile 4
GB00954	SAMN02436255	GCF_000322645.1	Human	Vaginal-rectal	USA:MI	2006	Healthy		22	ST22	II	PI-2a	AlphaC	Allele1	gbs2018a	Allele7	rsp-profile 4
GB00919	SAMN02436256	GCF_000322485.1	Human	Vaginal-rectal	USA:MI	2006	Healthy		12	CC10	II	PI-1 and PI-2a	AlphaC	Allele1	gbs2018a	Other	rsp-profile 5
STIR-CD-01	SAMN02436257	GCF_000323045.1	Fish						7	CC7	Ia	PI-1 and PI-2b	AlphaC	Allele1	gbs2018a	Allele3	rsp-profile 5
MRIZ1-203	SAMN02436258	GCF_000322705.1	Seal						23	CC23	Ia	PI-2a		Allele1	gbs2018b	Allele5	rsp-profile 4
FSLS3-027	SAMN02436304	GCF_000322585.1	Bovine	Milk	USA: NY Schoharie County	2000	Diseased	Mastitis	SLV61	CC67	II	PI-2b			gbs2018d	Allele2	rsp-profile 1
MRIZ1-205	SAMN02436306	GCF_000323025.1	Dog						1	CC1	V	PI-1 and PI-2a	Alp2/3	Allele1	gbs2018a	Allele1	rsp-profile 3
GB01003	SAMN02436307	GCF_000322965.1	Human	Vaginal-rectal	USA:MI	2006	Healthy		SLV23	CC23	Ia	PI-2a	Epsilon	Allele1	gbs2018b	Allele5	rsp-profile 4
GB00999	SAMN02436308	GCF_000322505.1	Human	Vaginal-rectal	USA:MI	2006	Healthy		1	CC1	V	PI-1 and PI-2a	Alp2/3	Allele1		Allele1	rsp-profile 3
GB00900	SAMN02436309	GCF_000322865.1	Human	Vaginal-rectal	USA:MI	2006	Healthy		1046	CC19	III	PI-1 and PI-2a	Rib	Allele1	gbs2018b	Allele1	rsp-profile 53
MC628	SAMN02436764	GCF_000419075.2	Human	Stool	USA: MO		Diseased	Bacteremia	19	CC19	III	PI-1 and PI-2a	Rib	Allele1	gbs2018b	Allele1	rsp-profile 6
MC621	SAMN02436766	GCF_000419195.2	Human	Blood	USA: MO		Diseased	Bacteremia	SLV55	CC23	II	PI-1 and PI-2a	Alp2/3	Allele1	gbs2018b	Allele6	rsp-profile 57
MC629	SAMN02436825	GCF_000419055.2	Human	Stool	USA: MO		Diseased	Bacteremia	88	CC23	II	PI-1 and PI-2a	Alp2/3	Allele1	gbs2018b	Allele6	rsp-profile 5
MC624	SAMN02436826	GCF_000419155.2	Human	Blood	USA: MO		Diseased	Bacteremia	1	CC1	V	PI-1 and PI-2a	Alp2/3	Allele1	gbs2018a	Allele1	rsp-profile 3
MC626	SAMN02436896	GCF_000419115.2	Human	Stool	USA: MO		Diseased	Bacteremia	23	CC23	Ia	PI-2a	Epsilon	Allele1	gbs2018b	Allele5	rsp-profile 30
MC625	SAMN02436897	GCF_000419135.2	Human	Stool	USA: MO		Diseased	Bacteremia	1	CC1	V	PI-1 and PI-2a	Alp2/3	Allele1	gbs2018a	Allele1	rsp-profile 3
MC623	SAMN02436898	GCF_000419175.2	Human	Blood	USA: MO		Diseased	Bacteremia	23	CC23	Ia	PI-2a	Epsilon	Allele1	gbs2018b	Allele5	rsp-profile 4
ZQ0910	SAMN02469855	GCF_000264975.1	Fish		China: Guangdong	2012	Diseased	Meningoencephalitis	7	CC7	Ia		AlphaC		gbs2018a	Allele3	rsp-profile 5
PR06	SAMN02471433	GCF_000372605.1	Human	Blood	Malaysia: Kelantan	2009	Diseased	Sepsis	1	CC1	VI	PI-1 and PI-2a	AlphaC	Allele1	gbs2018c	Allele1	rsp-profile 6
GD201008-001	SAMN02603155	GCF_000299135.1	Fish		China	2010	Diseased	Meningoencephalitis	7	CC7	Ia	PI-2b	AlphaC		gbs2018a	Allele3	rsp-profile 5
SA20-06	SAMN02603506	GCF_000302475.1	Fish	Kidney	Brazil	2006	Diseased	Meningoencephalitis	SLV552	CC552	Ib	PI-2b				Other	rsp-profile 49
A909	SAMN02604011	GCF_000012705.1	Human			1934	Diseased	Sepsis	7	CC7	Ia	PI-1 and PI-2b	AlphaC	Allele1	gbs2018a	Allele3	rsp-profile 5
2603VR	SAMN02604013	GCF_000007265.1	Human		USA		Diseased	Adult invasive disease	110	CC19	V	PI-1 and PI-2a	Rib	Allele2	gbs2018b	Allele1	rsp-profile 55
GBS1-NY	SAMN02720890	GCF_000831145.1	Human	Blood	USA: NY	2011	Diseased	Sepsis	22	ST22	II	PI-2a	AlphaC	Allele1	gbs2018a	Allele7	rsp-profile 4
ENC06	SAMN02727658	GCF_000714695.1	Fish	Water	Thailand: Nakhon Pathom	2011	Diseased	Streptococcosis	7	CC7	Ia	PI-1 and PI-2b	AlphaC		gbs2018a	Allele3	rsp-profile 5
FPrA02	SAMN02727743	GCF_000715315.1	Fish	Kidney	Thailand: Prachin Buri	2009	Diseased	Streptococcosis	7	CC7	Ia	PI-1 and PI-2b	AlphaC		gbs2018a	Allele3	rsp-profile 5
FNA07	SAMN02727744	GCF_000715295.1	Fish	Kidney	Thailand: Ayutthaya	2008	Diseased	Streptococcosis	7	CC7	Ia	PI-1 and PI-2b	AlphaC		gbs2018a	Allele3	rsp-profile 5
NGBS061	SAMN02741687	GCF_000730215.1	Human		Canada: Greater Toronto Area	2010	Diseased		459	CC459	IV	PI-1 and PI-2a	Epsilon	Allele1	gbs2018a	Allele1	rsp-profile 7
NGBS572	SAMN02741688	GCF_000730255.1	Human		Canada: Greater Toronto Area	2012	Diseased		452	CC452	IV	PI-2b	AlphaC	Allele2	gbs2018b	Allele5	rsp-profile 2
NGS-ED-1000	SAMN02934115	GCF_000736485.1	Human	Blood	United Kingdom: Edinburgh Royal Infirmary Edinburgh Neonatal unit	2013	Diseased	Sepsis	7	CC7	Ia	PI-1 and PI-2b	AlphaC	Allele1	gbs2018a	Allele3	rsp-profile 5
GX064	SAMN02991566	GCF_001190845.1	Fish	Brain	China: Guangxi Province	2011	Diseased	Streptococcosis	7	CC7	Ia	PI-2b	AlphaC		gbs2018a	Allele3	rsp-profile 5
H002	SAMN02991570	GCF_001190885.1	Human	Vaginal-rectal	China: Guangxi Province	2011	Diseased	Invasive neonatal disease	928	CC19	III	PI-1 and PI-2a	Rib	Allele1	gbs2018b	Allele1	rsp-profile 6
HN016	SAMN02992126	GCF_001190805.1	Fish	Brain	China: Guangxi Province	2011	Diseased	Streptococcosis	7	CC7	Ia	PI-2b	AlphaC		gbs2018a	Allele3	rsp-profile 5
YM001	SAMN02996604	GCF_001190825.1	Fish	Brain	China: Guangxi Province	2011	Diseased	Streptococcosis	7	CC7	Ia		AlphaC		gbs2018a	Allele3	rsp-profile 5
CNCTC-10-84	SAMN03178022	GCF_000782855.1	Human		USA: Atlanta GA	1977	Diseased	Invasive disease	26	ST26	V	PI-2a			gbs2018f	Other	rsp-profile 4
357_SAGA	SAMN03197547	GCF_001070935.1	Human	Placenta	USA: WA	2012/2013			22	ST22	II	PI-2a	AlphaC	Other	gbs2018a	Allele7	rsp-profile 4
369_SAGA	SAMN03197559	GCF_001072615.1	Human	Sputum	USA: WA	2012/2013			23	CC23	Ia	PI-2a	Epsilon	Allele1	gbs2018b	Allele5	rsp-profile 4
408_SAGA	SAMN03197598	GCF_001072815.1	Human	Sputum	USA: WA	2012/2013			23	CC23	Ia	PI-2a	Epsilon	Allele1	gbs2018b	Allele5	rsp-profile 4
745_SAGA	SAMN03197951	GCF_001074175.1	Human	Tracheal Aspirate	USA: WA	2012/2013			23	CC23	Ia	PI-2a	Epsilon	Allele1	gbs2018b	Allele5	rsp-profile 4
750_SAGA	SAMN03197957	GCF_001074215.1	Human	Urine	USA: WA	2012/2013			1	CC1	V	PI-1 and PI-2a	Alp2/3	Allele1	gbs2018a	Allele1	rsp-profile 3
759_SAGA	SAMN03197967	GCF_001074255.1	Human	Blood	USA: WA	2012/2013	Diseased	Neonatal disease	23	CC23	Ia	PI-2a	Epsilon	Allele1	gbs2018b	Allele5	rsp-profile 4
765_SAGA	SAMN03197974	GCF_001074285.1	Human	Urine	USA: WA	2012/2013			1	CC1	V	PI-1 and PI-2a	Alp2/3	Allele1	gbs2018a	Allele1	rsp-profile 3
846_SAGA	SAMN03198054	GCF_001074585.1	Human	Blood	USA: WA	2012/2013	Diseased	Neonatal disease	509	CC10	II	PI-1 and PI-2a	AlphaC	Allele1	gbs2018a	Allele3	rsp-profile 8
986_SAGA	SAMN03198207	GCF_001076065.1	Human	Wound	USA: WA	2012/2013	Diseased	Adult wound	853	CC19	III	PI-1 and PI-2a	Rib	Allele1	gbs2018b	Allele1	rsp-profile 6
M19	SAMN03292190	GCF_001708205.1	Bovine	Milk	China: Ningxia	2010	Diseased	Mastitis	103	CC103	Ia	PI-2b			gbs2018a	Other	rsp-profile 61
SS1	SAMN03329971	GCF_001026925.1	Human	Blood	USA: Houston	1992	Diseased	Invasive disease	1	CC1	V	PI-1 and PI-2a	Alp2/3	Allele1	gbs2018a	Allele1	rsp-profile 3
CU_GBS_98	SAMN03331944	GCF_001592425.1	Human	Cerebrospinal fluid	Hong Kong	1998	Diseased	Meningitis	283	CC283	III	PI-1 and PI-2a	AlphaC	Allele1	gbs2018a	Allele3	rsp-profile 5
CU_GBS_08	SAMN03331945	GCF_001592385.1	Human	Blood	Hong Kong	2008	Diseased	TSST	283	CC283	III	PI-1 and PI-2a	AlphaC	Allele1	gbs2018a	Allele3	rsp-profile 5
DK-B-USS-032	SAMN03434993	GCF_001017925.1	Bovine	Milk	Denmark	1994	Diseased	Mastitis	10	CC10	V	PI-1 and PI-2a	AlphaC	Allele2	gbs2018a	Allele3	rsp-profile 5
DK-B-USS-055	SAMN03434994	GCF_001017935.1	Bovine	Milk	Denmark		Diseased	Mastitis	6	CC7	Ib	PI-2a	AlphaC	Allele1	gbs2018a	Allele3	rsp-profile 5
DK-B-USS-084	SAMN03434995	GCF_001018615.1	Bovine	Milk	Finland	1996	Diseased	Mastitis	103	CC103	Ia	PI-2b			gbs2018a	Other	rsp-profile 4
DK-B-USS-146	SAMN03434996	GCF_001018575.1	Bovine	Milk	Australia: Victoria	2000	Diseased	Mastitis	SLV67	CC67	II	PI-2b				Allele2	rsp-profile 14
DK-B-USS-147	SAMN03434997	GCF_001017975.1	Bovine	Milk	Australia: Victoria		Diseased	Mastitis	SLV67	CC67	II	PI-2b				Allele2	rsp-profile 14
DK-B-USS-155	SAMN03434998	GCF_001017995.1	Bovine	Milk	Australia: Victoria		Diseased	Mastitis	SLV67	CC67	II	PI-2b	Alp4		gbs2018c	Allele2	rsp-profile 1
DK-B-USS-196	SAMN03434999	GCF_001018005.1	Bovine	Milk	USA: NY Madison County	1999	Diseased	Mastitis	415	CC67	II	PI-2b			gbs2018d	Allele2	rsp-profile 1
DK-B-USS-204	SAMN03435000	GCF_001018015.1	Bovine	Milk	USA: NY Onedia County	1999	Diseased	Mastitis	SLV61	CC67	II	PI-2b			gbs2018d	Allele2	rsp-profile 1
DK-B-USS-215	SAMN03435001	GCF_001018055.1	Bovine	Milk	USA: NY Delaware County	1999	Diseased	Mastitis	61	CC67	III	PI-2b	Epsilon		gbs2018d	Allele2	rsp-profile 1
DK-B-USS-225	SAMN03435002	GCF_001018495.1	Bovine	Milk	USA: NY Erie County	1999	Diseased	Mastitis	489	CC67	II	PI-2b			gbs2018d	Allele2	rsp-profile 1
IMMI_409	SAMN03435003	GCF_001018485.1	Human	Vaginal-rectal	Denmark: Skive	2010	Healthy		19	CC19	III	PI-1 and PI-2a	Rib	Allele1	gbs2018b	Allele1	rsp-profile 6
USS-107	SAMN03435004	GCF_001018535.1	Human	Vaginal-rectal	USA: NY	1998	Healthy		182	CC19	III	PI-1 and PI-2a	Rib	Allele1	gbs2018b	Allele1	rsp-profile 6
BE-PW-080	SAMN03435007	GCF_001018565.1	Human	Vaginal-rectal	Belgium	2010	Healthy		484	CC17	III	PI-1 and PI-2b	Rib	Allele2	gbs2018e	Allele4	rsp-profile 2
BE-PW-096	SAMN03435009	GCF_001018335.1	Human	Vaginal-rectal	Belgium	2010	Healthy		8	CC10	Ib	PI-2a	AlphaC	Allele1	gbs2018a	Allele3	rsp-profile 5
BE-PW-108	SAMN03435011	GCF_001018395.1	Human	Vaginal-rectal	Belgium	2010	Healthy		8	CC10	Ib	PI-1 and PI-2a	AlphaC	Allele1	gbs2018a	Allele3	rsp-profile 5
BE-PW-119	SAMN03435013	GCF_001018415.1	Human	Vaginal-rectal	Belgium	2010	Healthy		8	CC10	Ib	PI-1 and PI-2a	AlphaC	Allele1	gbs2018a	Allele3	rsp-profile 5
BE-PW-130	SAMN03435015	GCF_001018475.1	Human	Vaginal-rectal	Belgium	2010	Healthy		SLV23	CC23	Ia	PI-2a	Epsilon	Other	gbs2018b	Allele5	rsp-profile 50
BG-PW-056	SAMN03435017	GCF_001018085.1	Human	Vaginal-rectal	Bulgaria	2010	Healthy		23	CC23	Ia	PI-2a	Epsilon	Allele1	gbs2018b	Other	rsp-profile 4
CZ-PW-143	SAMN03435019	GCF_001018135.1	Human	Vaginal-rectal	Czech Republic	2009	Healthy		1	CC1	V	PI-1 and PI-2a	Alp2/3	Allele1	gbs2018a	Allele1	rsp-profile 3
DE-NI-024	SAMN03435020	GCF_001018155.1	Human	Blood	Germany	2009	Diseased	Sepsis	17	CC17	III	PI-1 and PI-2b	Rib	Allele2	gbs2018e	Allele4	rsp-profile 2
DE-NI-035	SAMN03435021	GCF_001018175.1	Human	Blood	Germany	2009	Diseased	Meningitis	17	CC17	III	PI-1 and PI-2b	Rib	Allele2	gbs2018e	Allele4	rsp-profile 2
DE-PW-436	SAMN03435024	GCF_001018225.1	Human	Vaginal-rectal	Germany	2010	Healthy		1	CC1	V	PI-1 and PI-2a	Alp2/3	Allele1	gbs2018a	Allele1	rsp-profile 27
DK-PW-014	SAMN03435025	GCF_001018255.1	Human	Vaginal-rectal	Denmark	2009	Healthy		520	CC19	II	PI-1 and PI-2a	Rib	Allele2	gbs2018b	Other	rsp-profile 6
DK-PW-024	SAMN03435026	GCF_001018245.1	Human	Vaginal-rectal	Denmark	2009	Healthy		12	CC10	II	PI-2a	AlphaC	Allele1	gbs2018a	Allele3	rsp-profile 8
DK-PW-070	SAMN03435029	GCF_001017845.1	Human	Vaginal-rectal	Denmark	2009	Healthy		8	CC10	nt	PI-1 and PI-2a	AlphaC	Allele1	gbs2018a	Allele3	rsp-profile 5
ES-NI-001	SAMN03435034	GCF_001010345.1	Human	Blood	Spain	2008	Diseased	Sepsis	17	CC17	III	PI-1 and PI-2b	Rib	Allele2	gbs2018e	Allele4	rsp-profile 2
ES-NI-003	SAMN03435035	GCF_001016545.1	Human	Blood	Spain	2008	Diseased	Otitis	17	CC17	III	PI-1 and PI-2b	Rib	Allele2	gbs2018e	Allele4	rsp-profile 2
ES-NI-010	SAMN03435036	GCF_001016695.1	Human	Blood & Cerebrospinal fluid	Spain	2008	Diseased	Meningitis	17	CC17	III	PI-1 and PI-2b	Rib	Allele2	gbs2018e	Allele4	rsp-profile 2
ES-PW-004	SAMN03435037	GCF_001016595.1	Human	Vaginal-rectal	Spain	2008	Healthy		28	CC19	II	PI-1 and PI-2a	Rib	Allele2	gbs2018b	Other	rsp-profile 6
ES-PW-008	SAMN03435038	GCF_001016575.1	Human	Vaginal-rectal	Spain	2008	Healthy		19	CC19	III	PI-1 and PI-2a	Rib	Allele1	gbs2018b	Allele1	rsp-profile 6
ES-PW-043	SAMN03435041	GCF_001016675.1	Human	Vaginal-rectal	Spain	2008	Healthy		23	CC23	Ia	PI-2a	Epsilon	Allele1	gbs2018b	Allele5	rsp-profile 4
ES-PW-063	SAMN03435042	GCF_001016625.1	Human	Vaginal-rectal	Spain	2008	Healthy		19	CC19	III	PI-1 and PI-2a	Rib	Allele1	gbs2018b	Allele1	rsp-profile 6
ES-PW-068	SAMN03435043	GCF_001016725.1	Human	Vaginal-rectal	Spain	2008	Healthy		23	CC23	Ia	PI-2a	Epsilon	Allele1	gbs2018b	Allele5	rsp-profile 4
ES-PW-085	SAMN03435045	GCF_001016715.1	Human	Vaginal-rectal	Spain	2008	Healthy		19	CC19	V	PI-1 and PI-2a	Epsilon	Allele2	gbs2018b	Allele1	rsp-profile 6
ES-PW-088	SAMN03435047	GCF_001016795.1	Human	Vaginal-rectal	Spain	2008	Healthy		17	CC17	III	PI-1 and PI-2b	Rib	Allele2	gbs2018e	Allele4	rsp-profile 2
ES-PW-121	SAMN03435049	GCF_001016835.1	Human	Vaginal-rectal	Spain	2008	Healthy		23	CC23	Ia	PI-2a	Epsilon	Allele1	gbs2018b	Allele5	rsp-profile 4
ES-PW-124	SAMN03435050	GCF_001016855.1	Human	Vaginal-rectal	Spain	2009	Healthy		23	CC23	Ia	PI-2a	Epsilon	Allele1	gbs2018b	Allele5	rsp-profile 4
ES-PW-153	SAMN03435051	GCF_001016815.1	Human	Vaginal-rectal	Spain	2009	Healthy		24	CC452	Ia	PI-2a	AlphaC	Allele1	gbs2018b	Allele5	rsp-profile 4
ES-PW-156	SAMN03435052	GCF_001016875.1	Human	Vaginal-rectal	Spain	2008	Healthy		19	CC19	III	PI-1 and PI-2a	Rib	Allele1	gbs2018b	Allele1	rsp-profile 6
ES-PW-160	SAMN03435053	GCF_001016895.1	Human	Vaginal-rectal	Spain	2008	Healthy		12	CC10	II	PI-1 and PI-2a	AlphaC	Allele1	gbs2018a	Allele3	rsp-profile 8
ES-PW-181	SAMN03435055	GCF_001016955.1	Human	Vaginal-rectal	Spain	2008	Healthy		17	CC17	III	PI-1 and PI-2b	Rib	Allele2	gbs2018e	Allele4	rsp-profile 2
GB-PW-021	SAMN03435058	GCF_001016525.1	Human	Vaginal-rectal	United Kingdom	2009	Healthy		12	CC10	II	PI-1 and PI-2a	AlphaC	Allele1	gbs2018a	Other	rsp-profile 5
GB-PW-049	SAMN03435061	GCF_001016965.1	Human	Vaginal-rectal	United Kingdom	2009	Healthy		19	CC19	V	PI-1 and PI-2a	Rib	Allele2	gbs2018b	Allele1	rsp-profile 6
GB-PW-051	SAMN03435062	GCF_001017035.1	Human	Vaginal-rectal	United Kingdom	2009	Healthy		19	CC19	V	PI-1 and PI-2a	Epsilon	Allele2	gbs2018b	Allele1	rsp-profile 6
GB-PW-075	SAMN03435064	GCF_001017015.1	Human	Vaginal-rectal	United Kingdom	2009	Healthy		1	CC1	nt	PI-1 and PI-2a	Alp2/3	Allele1	gbs2018a	Allele1	rsp-profile 3
GB-PW-088	SAMN03435067	GCF_001015445.1	Human	Vaginal-rectal	United Kingdom	2009	Healthy		19	CC19	V	PI-1 and PI-2a	Epsilon	Allele2	gbs2018b	Allele1	rsp-profile 6
GB-PW-091	SAMN03435068	GCF_001015505.1	Human	Vaginal-rectal	United Kingdom	2009	Healthy		12	CC10	II	PI-1 and PI-2a	AlphaC	Allele1	gbs2018a	Allele3	rsp-profile 5
GB-PW-094	SAMN03435069	GCF_001015425.1	Human	Vaginal-rectal	United Kingdom	2009	Healthy		24	CC452	Ia	PI-2a	AlphaC	Allele1	gbs2018b	Allele5	rsp-profile 52
GB-PW-097	SAMN03435070	GCF_001015435.1	Human	Vaginal-rectal	United Kingdom	2009	Healthy		12	CC10	Ib	PI-1 and PI-2a	AlphaC	Allele1	gbs2018a	Allele3	rsp-profile 8
GB-PW-110	SAMN03435072	GCF_001015525.1	Human	Vaginal-rectal	United Kingdom	2009	Healthy		4	CC4	Ia	PI-1 and PI-2b	Epsilon	Allele2		Allele1	rsp-profile 6
IT-NI-001	SAMN03435073	GCF_001015575.1	Human	Cerebrospinal fluid	Italy	2008	Diseased	Meningitis	17	CC17	III	PI-1 and PI-2b	Rib	Allele2	gbs2018e	Allele4	rsp-profile 2
IT-NI-023	SAMN03435074	GCF_001015555.1	Human	Blood	Italy	2009	Diseased	Sepsis	23	CC23	Ia	PI-2a	Epsilon	Allele1	gbs2018b	Allele5	rsp-profile 4
IT-NI-025	SAMN03435075	GCF_001015595.1	Human	Blood	Italy	2009	Diseased	Sepsis	28	CC19	II	PI-1 and PI-2a	Rib	Allele2	gbs2018b	Allele1	rsp-profile 33
IT-PW-055	SAMN03435082	GCF_001015695.1	Human	Vaginal-rectal	Italy	2008	Healthy		12	CC10	Ib	PI-1 and PI-2a	AlphaC	Allele1	gbs2018a		rsp-profile 5
090R_799	SAMN03435083	GCF_001015775.1	Human	Vaginal-rectal	Denmark: Copenhagen	2009	Healthy		25	CC23	Ia	PI-1 and PI-2a	Alp2/3	Allele1	gbs2018b	Allele6	rsp-profile 4
B848	SAMN03435084	GCF_001015765.1	Human	Vaginal-rectal	Denmark		Healthy		SLV19	CC19	III	PI-1 and PI-2a	Rib	Allele1	gbs2018b	Allele1	rsp-profile 6
290183	SAMN03435085	GCF_001015815.1	Human	Vaginal-rectal	Portugal	2000	Healthy		23	CC23	Ia	PI-2a	Epsilon	Allele1	gbs2018b	Allele5	rsp-profile 4
294206	SAMN03435086	GCF_001015755.1	Human	Skin and soft tissue	Portugal	2000	Diseased	Adult invasive disease	2	CC1	V	PI-1 and PI-2a	Epsilon	Allele1	gbs2018a	Allele1	rsp-profile 3
299693	SAMN03435087	GCF_001015835.1	Human	Urine	Portugal	2000	Diseased	Adult invasive disease	17	CC17	III	PI-1 and PI-2b	Rib	Allele2	gbs2018e	Allele4	rsp-profile 2
309185	SAMN03435088	GCF_001015845.1	Human	Skin and soft tissue	Portugal	2000	Diseased	Adult invasive disease	23	CC23	Ia	PI-2a	Epsilon	Allele1	gbs2018b	Allele5	rsp-profile 4
312754	SAMN03435089	GCF_001015875.1	Human		Portugal		Healthy		24	CC452	Ia	PI-2a	AlphaC	Allele1	gbs2018b	Allele5	rsp-profile 4
325662	SAMN03435090	GCF_001015895.1	Human	Vaginal-rectal	Portugal	2000	Healthy		SLV24	CC452	Ia	PI-2a	AlphaC	Allele1	gbs2018b	Allele5	rsp-profile 4
343959	SAMN03435091	GCF_001015925.1	Human	Skin and soft tissue	Portugal	2001	Diseased	Adult invasive disease	23	CC23	Ia	PI-2a	Epsilon	Allele1	gbs2018b	Allele5	rsp-profile 4
379415	SAMN03435092	GCF_001016335.1	Human	Urine	Portugal	2001	Diseased	Adult invasive disease	SLV17	CC17	III	PI-1 and PI-2b	Rib	Allele2	gbs2018e	Allele4	rsp-profile 2
383728	SAMN03435093	GCF_001015965.1	Human	Skin and soft tissue	Portugal	2001	Diseased	Adult invasive disease	23	CC23	Ia	PI-2a	Epsilon	Allele1	gbs2018b	Allele5	rsp-profile 4
384541	SAMN03435094	GCF_001015995.1	Human	Skin and soft tissue	Portugal	2001	Diseased	Adult invasive disease	2	CC1	V	PI-1 and PI-2a	Epsilon	Allele1	gbs2018a	Allele1	rsp-profile 3
404288	SAMN03435095	GCF_001016005.1	Human	Skin and soft tissue	Portugal	2001	Diseased	Adult invasive disease	23	CC23	Ia	PI-2a	Epsilon	Allele1	gbs2018b	Allele5	rsp-profile 4
408523	SAMN03435096	GCF_001016095.1	Human	Urine	Portugal	2002	Diseased	Adult invasive disease	2	CC1	V	PI-1 and PI-2a	Epsilon	Allele1	gbs2018a	Allele1	rsp-profile 3
418136	SAMN03435097	GCF_001016035.1	Human	Vaginal-rectal	Portugal	2002	Healthy		19	CC19	III	PI-1 and PI-2a	Rib	Allele1	gbs2018b	Allele1	rsp-profile 6
418849	SAMN03435098	GCF_001016115.1	Human	Skin and soft tissue	Portugal	2002	Diseased	Adult invasive disease	10	CC10	II	PI-1 and PI-2a	AlphaC	Allele1	gbs2018a	Allele3	rsp-profile 5
426748	SAMN03435099	GCF_001016045.1	Human	Urine	Portugal	2002	Diseased	Adult invasive disease	2	CC1	V	PI-1 and PI-2a	Epsilon	Allele1	gbs2018a	Allele1	rsp-profile 3
446329	SAMN03435100	GCF_001016135.1	Human		Portugal	2002	Healthy		19	CC19	V	PI-1 and PI-2a	Rib	Allele2	gbs2018b	Allele1	rsp-profile 6
AH20834	SAMN03435101	GCF_001016065.1	Human	Vaginal-rectal	Portugal	2002	Healthy		8	CC10	Ib	PI-1 and PI-2a	AlphaC	Allele1	gbs2018a	Other	rsp-profile 5
ML30419	SAMN03435102	GCF_001016125.1	Human	Vaginal-rectal	Portugal	2003	Healthy		17	CC17	III	PI-1 and PI-2b	Rib	Allele2	gbs2018e	Allele4	rsp-profile 2
SH0248	SAMN03435104	GCF_001016355.1	Human	Blood	Portugal	2001	Diseased	Adult invasive disease	17	CC17	III	PI-1 and PI-2b	Rib	Allele2	gbs2018e	Other	rsp-profile 2
SH0334	SAMN03435105	GCF_001016385.1	Human	Skin and soft tissue	Portugal	2004	Diseased	Adult invasive disease	19	CC19	III	PI-1 and PI-2a	Rib	Allele1	gbs2018b	Allele1	rsp-profile 6
SH0396	SAMN03435106	GCF_001016175.1	Human	Blood	Portugal	2004	Diseased	Adult invasive disease	12	CC10	II	PI-1 and PI-2a	AlphaC	Allele1	gbs2018a	Allele3	rsp-profile 8
SH0519	SAMN03435107	GCF_001016205.1	Human	Blood	Portugal	2004	Diseased	Adult invasive disease	12	CC10	II	PI-1 and PI-2a	AlphaC	Allele1	gbs2018a	Allele3	rsp-profile 8
SH0655	SAMN03435108	GCF_001016195.1	Human	Urine	Portugal	2004	Diseased	Adult invasive disease	286	CC19	III	PI-1 and PI-2a	Rib	Allele1	gbs2018b	Allele1	rsp-profile 54
SH0657	SAMN03435109	GCF_001017075.1	Human	Skin and soft tissue	Portugal	2004	Diseased	Adult invasive disease	1	CC1	V	PI-1 and PI-2a	Alp2/3	Allele1	gbs2018a	Allele1	rsp-profile 3
SH0668	SAMN03435111	GCF_001015955.1	Human	Urine	Portugal	2004	Diseased	Adult invasive disease	223	CC23	V	PI-2a	Rib	Allele2	gbs2018b	Allele5	rsp-profile 4
SH0702	SAMN03435112	GCF_001016215.1	Human	Vaginal-rectal	Portugal	2004	Healthy		2	CC1	V	PI-1 and PI-2a	Epsilon	Allele1	gbs2018a	Allele1	rsp-profile 3
SH0986	SAMN03435113	GCF_001015915.1	Human	Blood	Portugal	2004	Diseased	Adult invasive disease	12	CC10	II	PI-1 and PI-2a	AlphaC	Allele1	gbs2018a	Allele3	rsp-profile 8
SH1287	SAMN03435114	GCF_001016255.1	Human	Blood	Portugal	2006	Diseased	Adult invasive disease	23	CC23	Ia	PI-2a	Epsilon	Allele1	gbs2018b	Allele5	rsp-profile 4
SH1370	SAMN03435115	GCF_001016265.1	Human	Blood	Portugal	2006	Diseased	Adult invasive disease	1	CC1	V	PI-1 and PI-2a	Alp2/3	Allele1	gbs2018a	Allele1	rsp-profile 3
SH2515	SAMN03435116	GCF_001016435.1	Human	Blood	Portugal	2007	Diseased	Adult invasive disease	SLV10	CC10	V	PI-1 and PI-2a	AlphaC	Allele2	gbs2018a	Allele3	rsp-profile 5
SH2898	SAMN03435117	GCF_001016415.1	Human	Synovial fluid	Portugal	2007	Diseased	Adult invasive disease	1	CC1	V	PI-1 and PI-2a	Alp2/3	Allele1	gbs2018a	Allele1	rsp-profile 3
SH3115	SAMN03435118	GCF_001016285.1	Human	Blood	Portugal	2008	Diseased	Adult invasive disease	17	CC17	III	PI-1 and PI-2b	Rib	Allele2	gbs2018e	Allele4	rsp-profile 40
SH3601	SAMN03435119	GCF_001016445.1	Human	Ascitic fluid	Portugal	2008	Diseased	Adult invasive disease	19	CC19	III	PI-1 and PI-2a	Rib	Allele1	gbs2018b	Allele1	rsp-profile 6
SH3683	SAMN03435120	GCF_001016295.1	Human	Synovial fluid	Portugal	2008	Diseased	Adult invasive disease	23	CC23	Ia	PI-2a	Epsilon	Allele1	gbs2018b	Allele5	rsp-profile 51
PSS_7568	SAMN03948582	GCF_001546675.1	Human	Urine	USA: WA	2016	Healthy		19	CC19	III	PI-1 and PI-2a	Rib	Allele1	gbs2018b	Allele1	rsp-profile 6
PSS_7625	SAMN03948583	GCF_001546685.1	Human	Urine	USA: WA	2016	Healthy		8	CC10	Ib	PI-1 and PI-2a	AlphaC	Allele1	gbs2018a	Allele3	rsp-profile 5
PSS_7632a	SAMN03948584	GCF_001546695.1	Human	Urine	USA: WA	2016	Healthy		19	CC19	V	PI-1 and PI-2a	Rib	Allele2	gbs2018b	Allele1	rsp-profile 6
PSS_7632b	SAMN03950348	GCF_001546715.1	Human	Urine	USA: WA	2016	Healthy		459	CC459	IV	PI-1 and PI-2a	Epsilon	Allele1	gbs2018a	Allele1	rsp-profile 7
PSS_7678	SAMN03950349	GCF_001546755.1	Human	Urine	USA: WA	2016	Healthy		17	CC17	III	PI-1 and PI-2b	Rib	Allele2	gbs2018e	Allele4	rsp-profile 2
HZAUSC001	SAMN03955805	GCF_001675305.1	Fish	intestinal tract	China: Guangdong South Lake	2014	Diseased	Streptococcosis	7	CC7	Ia	PI-2b	AlphaC		gbs2018a	Allele3	rsp-profile 5
PSS_7722	SAMN03956188	GCF_001546775.1	Human	Urine	USA: WA	2016	Healthy		22	ST22	II	PI-2a	AlphaC	Allele1	gbs2018a	Allele7	rsp-profile 4
PSS_7736	SAMN03956189	GCF_001546785.1	Human	Urine	USA: WA	2016	Healthy		8	CC10	Ib	PI-1 and PI-2a	AlphaC	Allele1	gbs2018a	Allele3	rsp-profile 5
SG-M1	SAMN04002524	GCF_001275545.2	Human	Blood	Singapore	2015	Diseased	Septicemia and meningitis	283	CC283	III	PI-1 and PI-2a	AlphaC	Allele1	gbs2018a	Allele3	rsp-profile 5
NGBS128	SAMN04007140	GCF_001552035.1	Human		Canada: Greater Toronto area	2010			17	CC17	III	PI-1 and PI-2b	Rib	Allele2	gbs2018e	Allele4	rsp-profile 2
NGBS357	SAMN04007152	GCF_001712835.1	Human		Canada: Toronto	2011			297	CC1	V	PI-1 and PI-2a	Alp2/3	Allele1	gbs2018e	Allele1	rsp-profile 3
GBS ST-1	SAMN04111187	GCF_001448985.1	Dog	Oral	USA: Salinas California	2015	Healthy		1	CC1	V	PI-1 and PI-2a	Alp2/3	Allele1	gbs2018a	Allele1	rsp-profile 3
GBS-M002	SAMN04376007	GCF_001932715.1	Human	Vaginal-rectal	China:Taiwan	2014	Healthy		1	CC1	VI	PI-1 and PI-2a	AlphaC	Allele1	gbs2018c	Allele1	rsp-profile 6
1999	SAMN04481581	GCF_001693835.1	Human		Italy	1999	Healthy		SLV1	CC1	IV	PI-1 and PI-2a	Epsilon	Allele1	gbs2018a	Allele1	rsp-profile 3
2274	SAMN04481582	GCF_001693955.1	Human		Italy		Healthy		3	CC4	IV	PI-1 and PI-2a	AlphaC	Allele1	gbs2018a	Allele1	rsp-profile 7
5675	SAMN04481583	GCF_001693995.1	Human		Italy		Diseased	Adult invasive disease	196	CC459	IV	PI-1 and PI-2a	Epsilon	Allele1	gbs2018a	Allele1	rsp-profile 56
5877	SAMN04481584	GCF_001693865.1	Human		Italy		Diseased	Adult invasive disease	10	CC10	IV	PI-1 and PI-2a	AlphaC	Allele1	gbs2018a	Allele3	rsp-profile 5
351521	SAMN04481585	GCF_001694015.1	Human		Portugal	2001	Healthy		2	CC1	IV	PI-1 and PI-2a	Epsilon	Allele1	gbs2018a	Allele1	rsp-profile 3
AB-11	SAMN04481587	GCF_001693845.1	Human	Blood	USA	2012	Diseased	Adult invasive disease	459	CC459	IV	PI-1 and PI-2a	Epsilon	Allele1	gbs2018a	Allele1	rsp-profile 7
AB-13	SAMN04481588	GCF_001694025.1	Human	Blood	USA	2012	Diseased	Adult invasive disease	468	CC452	IV	PI-2b	AlphaC	Allele2	gbs2018b	Allele5	rsp-profile 2
AB-17	SAMN04481589	GCF_001693915.1	Human	Blood	USA	2012	Diseased	Adult invasive disease	459	CC459	IV	PI-1 and PI-2a	Epsilon	Allele1	gbs2018a	Allele1	rsp-profile 7
AB-22	SAMN04481590	GCF_001694045.1	Human	Blood	USA	2012	Diseased	Adult invasive disease	459	CC459	IV	PI-1 and PI-2a	Epsilon	Allele1	gbs2018a	Allele1	rsp-profile 7
AB-24	SAMN04481591	GCF_001693925.1	Human	Blood	USA	2012	Diseased	Adult invasive disease	452	CC452	IV	PI-2b	AlphaC	Allele2	gbs2018b	Allele5	rsp-profile 2
AB-35	SAMN04481592	GCF_001694075.1	Human	Blood	USA	2013	Diseased	Adult invasive disease	452	CC452	IV	PI-2b	AlphaC	Allele2	gbs2018b	Allele5	rsp-profile 2
AB-42	SAMN04481593	GCF_001694095.1	Human	Blood	USA	2013	Diseased	Adult invasive disease	459	CC459	IV	PI-1 and PI-2a	Epsilon	Allele1	gbs2018a	Allele1	rsp-profile 7
AB-46	SAMN04481594	GCF_001693965.1	Human	Blood	USA	2013	Diseased	Adult invasive disease	459	CC459	IV	PI-1 and PI-2a	Epsilon	Allele1	gbs2018a	Allele1	rsp-profile 7
AB-47	SAMN04481595	GCF_001694115.1	Human	Blood	USA	2013	Diseased	Adult invasive disease	24	CC452	IV	PI-2b	AlphaC	Allele2	gbs2018b	Allele5	rsp-profile 2
AB-48	SAMN04481596	GCF_001694125.1	Human	Blood	USA	2013	Diseased	Adult invasive disease	459	CC459	IV	PI-1 and PI-2a	Epsilon	Allele1	gbs2018a	Allele1	rsp-profile 7
AB-55	SAMN04481597	GCF_001694155.1	Human	Blood	USA	2013	Diseased	Adult invasive disease	459	CC459	IV	PI-1 and PI-2a	Epsilon	Allele1	gbs2018a	Allele1	rsp-profile 7
AB-56	SAMN04481598	GCF_001694175.1	Human	Blood	USA	2013	Diseased	Adult invasive disease	452	CC452	IV	PI-2b	AlphaC	Allele2	gbs2018b	Allele5	rsp-profile 2
AB-7	SAMN04481599	GCF_001694195.1	Human	Blood	USA	2012	Diseased	Adult invasive disease	452	CC452	IV	PI-2b	AlphaC	Allele2	gbs2018b	Allele5	rsp-profile 2
AB-70	SAMN04481600	GCF_001694205.1	Human	Blood	USA	2014	Diseased	Adult invasive disease	459	CC459	IV	PI-1 and PI-2a	Epsilon	Allele1	gbs2018a	Allele1	rsp-profile 7
ATL-29	SAMN04481601	GCF_001694235.1	Human	Vaginal-rectal	USA	2003	Healthy		452	CC452	IV	PI-2b	AlphaC	Allele2	gbs2018b	Allele5	rsp-profile 2
ATL-58	SAMN04481602	GCF_001694555.1	Human	Vaginal-rectal	USA	2002	Healthy		459	CC459	IV	PI-1 and PI-2a	Epsilon	Allele1	gbs2018a	Allele1	rsp-profile 7
ATL-77	SAMN04481603	GCF_001694255.1	Human	Vaginal-rectal	USA	2000	Healthy		452	CC452	IV	PI-2b	AlphaC	Allele2	gbs2018b	Allele5	rsp-profile 2
ATL-91	SAMN04481604	GCF_001694265.1	Human		USA	2003	Diseased	Neonatal invasive disease	452	CC452	IV	PI-2b	AlphaC	Allele2	gbs2018b	Allele5	rsp-profile 2
ATL-94	SAMN04481605	GCF_001694575.1	Human	Vaginal-rectal	USA	2003	Healthy		452	CC452	IV	PI-2b	AlphaC	Allele2	gbs2018b	Allele5	rsp-profile 2
BE-PW-052	SAMN04481606	GCF_001694285.1	Human	Vaginal-rectal	Belgium	2009	Healthy		196	CC459	IV	PI-1 and PI-2a	Epsilon	Allele1	gbs2018a	Allele1	rsp-profile 7
BE-PW-058	SAMN04481607	GCF_001694315.1	Human	Vaginal-rectal	Belgium	2009	Healthy		196	CC459	IV	PI-1 and PI-2a	Epsilon	Allele1	gbs2018a	Allele1	rsp-profile 7
BE-PW-073	SAMN04481608	GCF_001694325.1	Human	Vaginal-rectal	Belgium	2010	Healthy		196	CC459	IV	PI-1 and PI-2a	Epsilon	Allele1	gbs2018a	Allele1	rsp-profile 7
BE-PW-092	SAMN04481609	GCF_001694585.1	Human	Vaginal-rectal	Belgium	2010	Healthy		196	CC459	IV	PI-1 and PI-2a	Epsilon	Allele1	gbs2018a	Allele1	rsp-profile 7
BE-PW-118	SAMN04481610	GCF_001694355.1	Human	Vaginal-rectal	Belgium	2010	Healthy		196	CC459	IV	PI-1 and PI-2a		Allele1	gbs2018a	Allele1	rsp-profile 7
BE-PW-149	SAMN04481611	GCF_001694365.1	Human	Vaginal-rectal	Belgium	2010	Healthy		196	CC459	IV	PI-1 and PI-2a	Epsilon	Allele1		Allele1	rsp-profile 7
BE-PW-150	SAMN04481612	GCF_001694395.1	Human	Vaginal-rectal	Belgium	2010	Healthy		196	CC459	IV	PI-1 and PI-2a	Epsilon	Allele1	gbs2018a	Allele1	rsp-profile 7
BG-PW-065	SAMN04481615	GCF_001694425.1	Human	Vaginal-rectal	Bulgaria	2010	Healthy		SLV291	CC17	IV	PI-1 and PI-2b	Rib	Allele2	gbs2018e	Allele4	rsp-profile 2
CZ-PW-017	SAMN04481617	GCF_001694475.1	Human	Vaginal-rectal	Czech Republic	2009	Healthy		196	CC459	IV	PI-1 and PI-2a	Epsilon	Allele1	gbs2018a	Allele1	rsp-profile 7
CZ-PW-140	SAMN04481618	GCF_001694625.1	Human	Vaginal-rectal	Czech Republic	2009	Healthy		459	CC459	IV	PI-1 and PI-2a	Epsilon	Allele1	gbs2018a	Allele1	rsp-profile 7
CZ-PW-150	SAMN04481619	GCF_001694495.1	Human	Vaginal-rectal	Czech Republic	2010	Healthy		459	CC459	IV	PI-1 and PI-2a	Epsilon	Allele1	gbs2018a	Allele1	rsp-profile 7
DE-PW-196	SAMN04481620	GCF_001694645.1	Human	Vaginal-rectal	Germany	2009	Healthy		2	CC1	IV	PI-1 and PI-2a	Epsilon	Allele1	gbs2018a	Allele1	rsp-profile 3
DK-NI-19	SAMN04481621	GCF_001694675.1	Human	Placenta	Denmark	2010	Diseased	Invasive neonatal disease	196	CC459	IV	PI-1 and PI-2a	Epsilon	Other	gbs2018a	Allele1	rsp-profile 7
DK-PW-096	SAMN04481622	GCF_001694515.1	Human	Vaginal-rectal	Denmark	2010	Healthy		196	CC459	IV	PI-1 and PI-2a	Epsilon	Allele1	gbs2018a	Allele1	rsp-profile 7
DK-PW-161	SAMN04481623	GCF_001694525.1	Human	Vaginal-rectal	Denmark	2009	Healthy		2	CC1	IV	PI-1 and PI-2a	Epsilon	Allele1	gbs2018a	Allele1	rsp-profile 3
DK-PW-167	SAMN04481624	GCF_001694985.1	Human	Vaginal-rectal	Denmark	2010	Healthy		196	CC459	IV	PI-1 and PI-2a	Epsilon	Allele1	gbs2018a	Allele1	rsp-profile 7
ES-NI-012	SAMN04481625	GCF_001695015.1	Human	Cerebrospinal fluid	Spain	2008	Diseased	Invasive neonatal disease	2	CC1	IV	PI-1 and PI-2a	Epsilon	Allele1	gbs2018a	Allele1	rsp-profile 7
ES-NI-013	SAMN04481626	GCF_001695025.1	Human	Blood	Spain	2008	Diseased	Invasive neonatal disease	SLV196	CC459	IV	PI-1 and PI-2a	Epsilon	Allele1	gbs2018a	Allele1	rsp-profile 7
ES-PW-028	SAMN04481627	GCF_001695055.1	Human	Vaginal-rectal	Spain	2008	Healthy		645	CC1	IV	PI-1 and PI-2a	Rib	Allele1	gbs2018a	Allele1	rsp-profile 3
ES-PW-060	SAMN04481628	GCF_001695075.1	Human	Vaginal-rectal	Spain	2008	Healthy		196	CC459	IV	PI-1 and PI-2a	Epsilon	Allele1	gbs2018a	Allele1	rsp-profile 7
ES-PW-083	SAMN04481629	GCF_001695095.1	Human	Vaginal-rectal	Spain	2008	Healthy		SLV196	CC459	IV	PI-1 and PI-2a	Epsilon	Allele1	gbs2018a	Allele1	rsp-profile 7
ES-PW-101	SAMN04481630	GCF_001695105.1	Human	Vaginal-rectal	Spain	2008	Healthy		3	CC4	IV	PI-1 and PI-2a	AlphaC	Allele1	gbs2018a	Allele1	rsp-profile 7
ES-PW-130	SAMN04481631	GCF_001695135.1	Human	Vaginal-rectal	Spain	2008	Healthy		196	CC459	IV	PI-1 and PI-2a	Epsilon	Allele1	gbs2018a	Allele1	rsp-profile 7
ES-PW-135	SAMN04481632	GCF_001695155.1	Human	Vaginal-rectal	Spain	2008	Healthy		196	CC459	IV	PI-1 and PI-2a	Epsilon	Allele1		Allele1	rsp-profile 7
ES-PW-185	SAMN04481633	GCF_001695175.1	Human	Vaginal-rectal	Spain	2008	Healthy		196	CC459	IV	PI-1 and PI-2a	Epsilon	Allele1	gbs2018a	Allele1	rsp-profile 7
GB-PW-024	SAMN04481634	GCF_001695185.1	Human	Vaginal-rectal	United Kingdom	2009	Healthy		2	CC1	IV	PI-1 and PI-2a	Epsilon	Allele1	gbs2018a	Allele1	rsp-profile 3
IT-PW-052	SAMN04481635	GCF_001694695.1	Human	Vaginal-rectal	Italy	2008	Healthy		452	CC452	IV	PI-2b	AlphaC	Allele2	gbs2018b	Allele5	rsp-profile 2
IT-PW-075	SAMN04481636	GCF_001694705.1	Human	Vaginal-rectal	Italy	2009	Healthy		459	CC459	IV	PI-1 and PI-2a	Epsilon	Allele1		Allele1	rsp-profile 7
IT-PW-086	SAMN04481637	GCF_001694725.1	Human	Vaginal-rectal	Italy	2009	Healthy		533	CC1	IV	PI-1 and PI-2a	Epsilon	Allele1	gbs2018a	Allele1	rsp-profile 3
IT-PW-097	SAMN04481638	GCF_001694745.1	Human	Vaginal-rectal	Italy	2009	Healthy		136	CC459	IV	PI-1 and PI-2a	Epsilon	Allele1	gbs2018a	Allele1	rsp-profile 7
NOVUI-1	SAMN04481639	GCF_001694775.1	Human	Blood	USA	2005	Diseased	Adult invasive disease	452	CC452	IV	PI-2b	AlphaC	Allele2	gbs2018b	Allele5	rsp-profile 2
NOVUI-10	SAMN04481640	GCF_001694785.1	Human	Blood	USA	2006	Diseased	Adult invasive disease	1042	CC452	IV	PI-2b	AlphaC	Allele2	gbs2018b	Allele5	rsp-profile 2
NOVUI-11	SAMN04481641	GCF_001694815.1	Human	Synovial fluid	USA	2005	Diseased	Adult invasive disease	459	CC459	IV	PI-1 and PI-2a	Epsilon	Allele1	gbs2018a	Allele1	rsp-profile 7
NOVUI-19	SAMN04481642	GCF_001694825.1	Human	Blood	USA	2002	Diseased	Adult invasive disease	452	CC452	IV	PI-2b	AlphaC	Allele2	gbs2018b	Allele5	rsp-profile 2
NOVUI-2	SAMN04481643	GCF_001694905.1	Human	Blood	USA	2005	Diseased	Adult invasive disease	459	CC459	IV	PI-1 and PI-2a	Epsilon	Allele1	gbs2018a	Allele1	rsp-profile 7
NOVUI-26	SAMN04481644	GCF_001694855.1	Human	Blood	USA	2006	Diseased	Neonatal invasive disease	452	CC452	IV	PI-2b	AlphaC	Allele2	gbs2018b	Allele5	rsp-profile 2
NOVUI-4	SAMN04481645	GCF_001692935.1	Human	Blood	USA	2004	Diseased	Adult invasive disease	452	CC452	IV	PI-2b	AlphaC	Allele2	gbs2018b	Allele5	rsp-profile 2
NOVUI-5	SAMN04481646	GCF_001694895.1	Human	Bone	USA	2005	Diseased	Adult invasive disease	452	CC452	IV	PI-2b	AlphaC	Allele2	gbs2018b	Allele5	rsp-profile 2
NOVUI-6	SAMN04481647	GCF_001694875.1	Human	Blood	USA	2005	Diseased	Adult invasive disease	452	CC452	IV	PI-2b	AlphaC	Allele2	gbs2018b	Allele5	rsp-profile 2
NOVUI-7	SAMN04481648	GCF_001694935.1	Human	Blood	USA	2004	Diseased	Adult invasive disease	452	CC452	IV	PI-2b	AlphaC	Allele2	gbs2018b	Allele5	rsp-profile 2
NOVUI-8	SAMN04481649	GCF_001694945.1	Human	Blood	USA	2004	Diseased	Adult invasive disease	452	CC452	IV	PI-2b	AlphaC	Allele2	gbs2018b	Allele5	rsp-profile 2
SH4090	SAMN04481650	GCF_001694975.1	Human		Portugal	2008	Diseased	Adult invasive disease	499	CC1	IV	PI-1 and PI-2b	Epsilon	Allele1	gbs2018c	Allele1	rsp-profile 58
FWL1402	SAMN05187216	GCF_001683515.1	Frog		China: Huizhou	2014	Diseased		739	CC283	III	PI-1 and PI-2a	AlphaC	Other	gbs2018a	Allele3	rsp-profile 5
CH-1	SAMN05213948	GCF_001880625.1	Human	Cerebrospinal fluid	China	2013	Diseased	LOD	17	CC17	III	PI-2b	Rib	Allele2	gbs2018e	Allele4	rsp-profile 2
CH-2	SAMN05213949	GCF_001880665.1	Human	Blood	China	2013	Diseased	LOD	SLV17	CC17	III	PI-2b	Rib	Allele2	gbs2018e	Allele4	rsp-profile 62
GZ01	SAMN05213951	GCF_001880685.1	Human	Blood	China	2013	Diseased	EOD	17	CC17	III	PI-2b	Rib	Allele2	gbs2018e	Allele4	rsp-profile 2
GZ02	SAMN05213952	GCF_001880535.1	Human	Blood	China	2013	Diseased	EOD	17	CC17	III	PI-2b	Rib	Allele2	gbs2018e	Allele4	rsp-profile 2
GZ05	SAMN05213953	GCF_001880505.1	Human	Blood	China	2013	Diseased	EOD	17	CC17	III	PI-2b	Rib	Allele2	gbs2018e	Allele4	rsp-profile 2
GZ06	SAMN05213954	GCF_001880515.1	Human	Blood	China	2013	Diseased	LOD	17	CC17	III	PI-2b	Rib	Allele2	gbs2018e	Allele4	rsp-profile 2
GZ08	SAMN05213955	GCF_001880725.1	Human	Blood	China	2013	Diseased	EOD	17	CC17	III	PI-2b	Rib	Allele2	gbs2018e	Allele4	rsp-profile 2
GZ11	SAMN05213956	GCF_001880525.1	Human	Blood	China	2013	Diseased	LOD	17	CC17	III	PI-2b	Rib	Allele2	gbs2018e	Allele4	rsp-profile 2
GZ12	SAMN05213957	GCF_001880585.1	Human	Blood	China	2013	Diseased	LOD	17	CC17	III	PI-2b	Rib	Allele2	gbs2018e	Allele4	rsp-profile 2
GZ13	SAMN05213958	GCF_001880745.1	Human	Blood	China	2013	Diseased	LOD	SLV17	CC17	III	PI-1 and PI-2b	Rib	Allele2	gbs2018e	Allele4	rsp-profile 2
GZ14	SAMN05213959	GCF_001880605.1	Human	Cerebrospinal fluid	China	2013	Diseased	LOD	17	CC17	III	PI-2b	Rib	Allele2	gbs2018e	Allele4	rsp-profile 2
GZ19	SAMN05213960	GCF_001880765.1	Human	Blood	China	2013	Diseased	LOD	17	CC17	III	PI-2b	Rib	Allele2	gbs2018e	Allele4	rsp-profile 2
GZ20	SAMN05213961	GCF_001880615.1	Human	Cerebrospinal fluid	China	2013	Diseased	LOD	17	CC17	III	PI-2b	Rib	Allele2	gbs2018e	Allele4	rsp-profile 2
WC1535	SAMN05370985	GCF_001729925.1	Fish		China: Wenchang city Hainan province	2015	Diseased		7	CC7	Ia		AlphaC		gbs2018a	Allele3	rsp-profile 5
195-16-B-RAT	SAMN05762126	GCF_001856375.1	Rat	Nares	USA	2015	Healthy		1	CC1	V	PI-1 and PI-2a	Alp2/3	Allele1	gbs2018a	Allele1	rsp-profile 3
196-16-B-RAT	SAMN05762127	GCF_001856395.1	Rat	Blood	USA	2015	Diseased	Septicemia endocarditis meningoencephalitis metritis splenitis nephritis	12	CC10	Ib	PI-1 and PI-2a	AlphaC		gbs2018a	Allele3	rsp-profile 5
197-16-B-RAT	SAMN05762129	GCF_001856425.1	Rat	Cardiac lesion	USA	2015	Diseased	Septicemia endocarditis meningoencephalitis metritis splenitis nephritis	12	CC10	Ib	PI-1 and PI-2a	AlphaC		gbs2018a	Allele3	rsp-profile 5
198-16-B-RAT	SAMN05762133	GCF_001856445.1	Rat	Nares	USA	2015	Healthy		12	CC10	Ib	PI-1 and PI-2a	AlphaC		gbs2018a	Allele3	rsp-profile 5
0199-16-B-RAT	SAMN05762134	GCF_001856505.1	Rat	Nares	USA	2015	Healthy		12	CC10	Ib	PI-1 and PI-2a	AlphaC	Allele1	gbs2018a	Allele3	rsp-profile 5
200-16-B-RAT	SAMN05762135	GCF_001856455.1	Rat	Cardiac lesion	USA	2015	Diseased	Septicemia endocarditis pneumonia metritis	12	CC10	Ib	PI-1 and PI-2a	AlphaC		gbs2018a	Allele3	rsp-profile 5
0201-16-B-RAT	SAMN05762136	GCF_001856475.1	Rat	Fetus	USA	2015	Diseased	Septicemia endocarditis pneumonia metritis	12	CC10	Ib	PI-1 and PI-2a	AlphaC		gbs2018a	Allele3	rsp-profile 5
GBS6	SAMN05771129	GCF_000831105.1	Human		USA: NY	2009	Diseased	Invasive disease	22	ST22	II	PI-2a	AlphaC	Allele1	gbs2018a	Allele7	rsp-profile 4
GBS2-NM	SAMN05771130	GCF_000831125.1	Human	Blood	USA: New Mexico	2012	Diseased	Sepsis	22	ST22	II	PI-2a	AlphaC	Allele1	gbs2018a	Allele7	rsp-profile 4
ILRI025	SAMN06707234	GCA_002135575.1	Camel	Milk	Somalia: Puntland		Healthy		610	CC615	VI				gbs2018a	Allele3	rsp-profile 20
ILRI030	SAMN06707235	GCA_002135545.1	Camel	Milk	Somalia: Puntland		Healthy		617	CC615	VI	PI-2b			gbs2018a	Other	rsp-profile 15
ILRI037	SAMN06707236	GCA_002135495.1	Camel	Oral	Kenya: West Pokot	2004	Diseased	Gingivitis	612	CC615	Ia	PI-2b			gbs2018a	Allele3	rsp-profile 11
ILRI054	SAMN06707237	GCA_002135525.1	Camel	Wound	Kenya: Laikipia	2001	Diseased	Wound infection	615	CC615	II					Allele3	rsp-profile 21
ILRI067	SAMN06707238	GCA_002135595.1	Camel	Wound	Kenya: Samburu	2003	Diseased	Wound infection	614	CC609	V					Other	rsp-profile 22
ILRI120	SAMN06707239	GCA_002135505.1	Camel	Nasal	Kenya: Ngurunit Marsabit	2002	Diseased	Chronic cough	618	CC615	Ia	PI-2b			gbs2018a	Allele3	rsp-profile 11
ILRI127	SAMN06707240	GCF_002135445.1	Camel	Pus	Kenya: Laikipia	2002	Diseased	Periarthricular abscess	613	CC615	Ia	PI-2b			gbs2018a	Allele3	rsp-profile 11
JF4679	SAMN10055689	GCA_003859735.1	Bovine						622	CC67	nt		Alp2/3			Allele2	rsp-profile 19
JF4680	SAMN10055690	GCF_003859555.1	Bovine		Switzerland	2009			622	CC67	nt	PI-1 and PI-2b	Alp2/3			Allele2	rsp-profile 19
ILRI027	SAMN10055691	GCF_003859725.1	Camel	Milk	Kenya	2004	Healthy		616	ST616	III	PI-2b			gbs2018a	Allele3	rsp-profile 18
ILRI032	SAMN10055692	GCF_003859695.1	Camel	Wound	Kenya	2004	Diseased	Wound infection	612	CC615	Ia	PI-2b			gbs2018a	Allele3	rsp-profile 11
ILRI021	SAMN10055693	GCF_003859675.1	Camel	Pus	Kenya	2001	Diseased	Abscess	615	CC615	VI	PI-2b				Allele3	rsp-profile 21
ILRI022	SAMN10055694	GCF_003859485.1	Camel	Milk	Somalia	2004	Healthy		610	CC615	VI	PI-2b			gbs2018a	Allele3	rsp-profile 20
ILRI064	SAMN10055695	GCF_003859655.1	Camel	Milk	Somalia	2001	Healthy		617	CC615	VI	PI-2b			gbs2018a	Other	rsp-profile 15
ILRI068	SAMN10055696	GCF_003859635.1	Camel	Pus	Kenya	1999	Diseased	Abscess	612	CC615	Ia	PI-2b			gbs2018a	Allele3	rsp-profile 11
ILRI125	SAMN10055697	GCF_003859505.1	Camel	Milk	Kenya	1999	Diseased	Mastitis	616	ST616	III	PI-2b			gbs2018a	Other	rsp-profile 18
ILRI128	SAMN10055698	GCF_003859625.1	Camel	Pus	Kenya	2002	Diseased	Abscess	617	CC615	VI	PI-2b			gbs2018a	Other	rsp-profile 15
CH8-24	SAMN10055699	GCF_003859595.1	Human	Vaginal-rectal	Kenya	2010	Healthy		2	CC1	V	PI-1 and PI-2a	Rib	Allele1	gbs2018a	Allele1	rsp-profile 3
CH11	SAMN10055700	GCF_003859445.1	Human	Vaginal-rectal	Kenya	2007	Healthy		8	CC10	Ib	PI-1 and PI-2a	AlphaC	Allele1	gbs2018a	Allele3	rsp-profile 5
CH16-60	SAMN10055701	GCF_003859535.1	Human	Fat tissue	Kenya	2008	Diseased		484	CC17	III	PI-1 and PI-2b	Rib	Allele2	gbs2018e	Allele4	rsp-profile 2
CH17	SAMN10055702	GCF_003859515.1	Human	Vaginal-rectal	Kenya	2008	Healthy		2	CC1	II	PI-2a		Allele2	gbs2018a	Allele1	rsp-profile 6
CH21-83	SAMN10055703	GCF_003859455.1	Human	Pus	Kenya	2008	Diseased		12	CC10	Ib	PI-1 and PI-2a	AlphaC	Allele1	gbs2018a	Allele3	rsp-profile 5
CH24	SAMN10055704	GCF_003859425.1	Human	Blood	Kenya	2008	Diseased		103	CC103	Ia	PI-2b				Other	rsp-profile 4
CH35-134	SAMN10055705	GCF_003859585.1	Human	Urine	Kenya	2009	Diseased		23	CC23	III	PI-1 and PI-2a	Alp2/3			Allele1	rsp-profile 22
CH63	SAMN10055706	GCF_003725835.1	Human	Vaginal-rectal	Kenya	2007	Healthy		17	CC17	III	PI-1 and PI-2b	Rib	Allele2	gbs2018e	Allele4	rsp-profile 2

## Sheet: S2
Supplementary Table S2: Predictive value of the six dominant, MALDI-TOF MS assigned ribosomal subunit protein (rsp)-profiles 1-6 with respect to Group B Streptococcus (GBS) capsular serotype, clonal complex (CC) and surface protein variants.
Rsp-profile	Frequency in global GBS collection		Associated capsular serotype
	n	%	Ia	Ib	II	III	IV	V	VI	VIII	IX	nt
rsp-profile 1	134/796	0.168			122	4						8
rsp-profile 2	124/796	0.156				99	25
rsp-profile 3	111/796	0.14			17		9	80				5
rsp-profile 4	109/796	0.137	78		15	7		8			1
rsp-profile 5	96/796	0.121	23	41	15	6	1	8				2
rsp-profile 6	83/796	0.104	2		17	51	1	8	3	1
Rsp-profile	Frequency in global GBS collection		Associated CC
	n	%	CC1	CC4	CC7	CC10	CC17	CC19	CC23	CC67	CC103	CC283	CC452	other ST
rsp-profile 1	134/796	0.168								134
rsp-profile 2	124/796	0.156					101						23
rsp-profile 3	111/796	0.14	110	1
rsp-profile 4	109/796	0.137							71		4	1	11	22
rsp-profile 5	96/796	0.121			27	62			1			6
rsp-profile 6	83/796	0.104	10	1				72
Rsp-profile	Frequency in global GBS collection		Associated pilus island variants
	n	%	PI-1 and PI-2a	PI-1 and PI-2b	PI-2a	PI-2b	NA
rsp-profile 1	134/796	0.168				124	10
rsp-profile 2	124/796	0.156		87		37
rsp-profile 3	111/796	0.14	94		17
rsp-profile 4	109/796	0.137	9		96	4
rsp-profile 5	96/796	0.121	69	17	3	4	3
rsp-profile 6	83/796	0.104	73	3	7
Rsp-profile	Frequency in global GBS collection		Associated alpha-like protein (Alp) variants
	n	%	AlphaC	Alp2/3	Alp4	Epsilon	Rib	NA
rsp-profile 1	134/796	0.168			118	2		14
rsp-profile 2	124/796	0.156	23				101
rsp-profile 3	111/796	0.14	1	77		30	2	1
rsp-profile 4	109/796	0.137	31	8		52	6	12
rsp-profile 5	96/796	0.121	92	1		1	2
rsp-profile 6	83/796	0.104	3	1		9	67	3
Rsp-profile	Frequency in global GBS collection		Associated laminin-binding (Lmb) protein variants
	n	%	Allele1	Allele2	Other	NA
rsp-profile 1	134/796	0.168				134
rsp-profile 2	124/796	0.156		121	1	2
rsp-profile 3	111/796	0.14	92			19
rsp-profile 4	109/796	0.137	91	10	2	6
rsp-profile 5	96/796	0.121	63	6	2	25
rsp-profile 6	83/796	0.104	57	25	1
Rsp-profile	Frequency in global GBS collection		Associated bacterial adhesin (BibA) variants
	n	%	gbs2018a	gbs2018b	gbs2018c	gbs2018d	gbs2018e	gbs2018f	NA
rsp-profile 1	134/796	0.168			120	14
rsp-profile 2	124/796	0.156		23			101
rsp-profile 3	111/796	0.14	108				1		2
rsp-profile 4	109/796	0.137	19	82				6	2
rsp-profile 5	96/796	0.121	95	1
rsp-profile 6	83/796	0.104	6	72	4				1
Rsp-profile	Frequency in global GBS collection		Associated surface immunogenic protein (Sip) variants
	n	%	Allele1	Allele2	Allele3	Allele4	Allele5	Allele6	Allele7	Other	NA
rsp-profile 1	134/796	0.168		131							3
rsp-profile 2	124/796	0.156				98	23			3
rsp-profile 3	111/796	0.14	103							3	5
rsp-profile 4	109/796	0.137	2		2		68	4	15	18
rsp-profile 5	96/796	0.121			86			1		7	2
rsp-profile 6	83/796	0.104	76							7

## Sheet: S3
Supplementary Table S3: Protein queries used for in silico identifcation of major Group B Streptococcus surface protein variants.
Surface protein	Variant name	Protein query sequence	BLAST parameters
		NCBI accession ID	coverage	identity
Alpha-protein like family	Alpha-C	see Creti et al. (PMCID: PMC356896)	0.9	0.9
	Alp2/3
	Alp4
	Rib
	Epsilon
gbs2018 gene (BibA)	gbs2018a	ACU65612.1	0.95	0.95
	gbs2018b	ACU65630.1
	gbs2018c	ACU65646.1
	gbs2018d	ACU65642.1
	gbs2018e/HvgA	ACU65639.1
	gbs2018f	ACU65650.1
Laminin-binding protein	Lmb	CAC85393.1	0.5	0.6
Pilus islands	PI-1	NP_687665.1	0.5	0.6
		NP_687667.1
	PI-2a	NP_688405.1
		ACM07483.1
		NP_688404.1
	PI-2b	WP_000639479.1
		WP_000728388.1
		WP_000913265.1
Surface immunogenic protein	Sip	ABK56876.1	0.5	0.6

## Sheet: S4
Supplementary Table S4: Metadata of 248 Group B Streptococcus (GBS) in-house isolates and 8 GBS isolates from an external laboratory that were subtyped by MALDI-TOF MS in this study.
Sample.ID	Sample.ID2	ST	Serotype	Isolation.Source	Isolation.Origin	Reference (PMCID)	WGS available
S.agal_JF4680	JF4680	591		Cattle	Switzerland		yes
S.agal_CH109	109	1	V	Human	Kenya	PMC3187314
S.agal_CH35-134	35_134	23	III	Human	Kenya	PMC3187314	yes
S.agal_CH35	35	28	II	Human	Kenya	PMC3187314
S.agal_CH63	63	17	III	Human	Kenya	PMC3187314	yes
S.agal_CH11	11	8	Ib	Human	Kenya	PMC3187314	yes
S.agal_CH21-83	21_83	12	Ib	Human	Kenya	PMC3187314	yes
S.agal_CH36	36	17	III	Human	Kenya	PMC3187314
S.agal_CH24	24	103	Ia	Human	Kenya	PMC3187314	yes
S.agal_CH16-60	16_60	484	III	Human	Kenya	PMC3187314	yes
S.agal_CH17	17	2	II	Human	Kenya	PMC3187314	yes
S.agal_CH08-24	08_24	2	V	Human	Kenya	PMC3187314	yes
S.agal_CH33	33	3	IV	Human	Kenya	PMC3187314
S.agal_CH74	74	328	V	Human	Kenya	PMC3187314
S.agal_CH112	112	19	V	Human	Kenya	PMC3187314
S.agal_CAMEL27	ILRI005	609	V	Camel	Kenya/Somalia	PMC3850529	yes
S.agal_CAMEL39	ILRI025	610	VI	Camel	Kenya/Somalia	PMC3850529	yes
S.agal_CAMEL46	ILRI032	612	Ia	Camel	Kenya/Somalia	PMC3850529	yes
S.agal_CAMEL51	ILRI037	612	Ia	Camel	Kenya/Somalia	PMC3850529	yes
S.agal_CAMEL111	ILRI127	613	Ia	Camel	Kenya/Somalia	PMC3850529	yes
S.agal_CAMEL77	ILRI067	614	V	Camel	Kenya/Somalia	PMC3850529	yes
S.agal_CAMEL66	ILRI054	615	II	Camel	Kenya/Somalia	PMC3850529	yes
S.agal_CAMEL41	ILRI027	616	III	Camel	Kenya/Somalia	PMC3850529	yes
S.agal_CAMEL44	ILRI030	617	VI	Camel	Kenya/Somalia	PMC3850529	yes
S.agal_CAMEL104	ILRI120	618	Ia	Camel	Kenya/Somalia	PMC3850529	yes
S.agal_JF4679	JF4679	622		Cattle	Switzerland		yes
S.agal_A909	A909	7	Ia	Human		PMC1216834	yes
S.agal_COHI	COHI	17	III	Human		PMC1216834	yes
S.agal_2603V/R	2603V/R	110		Human		PMC1216834	yes
S.agal_CJB111	CJB111	1		Human		PMC1216834
S.agal_H36B	H36B	6		Human		PMC1216834
S.agal_18RS21	18RS21	19		Human		PMC1216834
S.agal_515	515	23		Human		PMC1216834
S.agal_JF4678	JF4678	621		Cattle	Switzerland
S.agal_CH103	103	484	III	Human	Kenya	PMC3187314
S.agal_CH47	47	2	II	Human	Kenya	PMC3187314
S.agal_CAMEL26	ILRI002	609		Camel	Kenya/Somalia	PMC3850529
S.agal_CAMEL36	ILRI022	610		Camel	Kenya/Somalia	PMC3850529	yes
S.agal_CAMEL75	ILRI065	611		Camel	Kenya/Somalia	PMC3850529
S.agal_CAMEL45	ILRI031	612		Camel	Kenya/Somalia	PMC3850529
S.agal_CAMEL49	ILRI035	612		Camel	Kenya/Somalia	PMC3850529
S.agal_CAMEL50	ILRI036	612		Camel	Kenya/Somalia	PMC3850529
S.agal_CAMEL52	ILRI038	612		Camel	Kenya/Somalia	PMC3850529
S.agal_CAMEL56	ILRI043	612		Camel	Kenya/Somalia	PMC3850529
S.agal_CAMEL57	ILRI045	612		Camel	Kenya/Somalia	PMC3850529
S.agal_CAMEL58	ILRI046	612		Camel	Kenya/Somalia	PMC3850529
S.agal_CAMEL60	ILRI048	612		Camel	Kenya/Somalia	PMC3850529
S.agal_CAMEL64	ILRI052	612		Camel	Kenya/Somalia	PMC3850529
S.agal_CAMEL65-1	ILRI053	612		Camel	Kenya/Somalia	PMC3850529
S.agal_CAMEL65-2	ILRI053	612		Camel	Kenya/Somalia	PMC3850529
S.agal_CAMEL68	ILRI056	612		Camel	Kenya/Somalia	PMC3850529
S.agal_CAMEL69	ILRI057	612		Camel	Kenya/Somalia	PMC3850529
S.agal_CAMEL70	ILRI058	612		Camel	Kenya/Somalia	PMC3850529
S.agal_CAMEL31	ILRI059	612		Camel	Kenya/Somalia	PMC3850529
S.agal_CAMEL32	ILRI060	612		Camel	Kenya/Somalia	PMC3850529
S.agal_CAMEL76	ILRI066	612		Camel	Kenya/Somalia	PMC3850529
S.agal_CAMEL33	ILRI068	612		Camel	Kenya/Somalia	PMC3850529	yes
S.agal_CAMEL78	ILRI069	612		Camel	Kenya/Somalia	PMC3850529
S.agal_CAMEL103	ILRI119	612		Camel	Kenya/Somalia	PMC3850529
S.agal_CAMEL105	ILRI121	612		Camel	Kenya/Somalia	PMC3850529
S.agal_CAMEL108	ILRI124	612		Camel	Kenya/Somalia	PMC3850529
S.agal_CAMEL29	ILRI040	613		Camel	Kenya/Somalia	PMC3850529
S.agal_CAMEL73	ILRI063	613		Camel	Kenya/Somalia	PMC3850529
S.agal_CAMEL34	ILRI083	613		Camel	Kenya/Somalia	PMC3850529
S.agal_CAMEL35	ILRI021	615		Camel	Kenya/Somalia	PMC3850529	yes
S.agal_CAMEL59	ILRI047	615		Camel	Kenya/Somalia	PMC3850529
S.agal_CAMEL79	ILRI080	615		Camel	Kenya/Somalia	PMC3850529
S.agal_CAMEL38	ILRI024	616		Camel	Kenya/Somalia	PMC3850529
S.agal_CAMEL40schwarz	ILRI026	616		Camel	Kenya/Somalia	PMC3850529
S.agal_CAMEL40blau	ILRI026	616		Camel	Kenya/Somalia	PMC3850529
S.agal_CAMEL42	ILRI028	616		Camel	Kenya/Somalia	PMC3850529
S.agal_CAMEL47	ILRI033	616		Camel	Kenya/Somalia	PMC3850529
S.agal_CAMEL88	ILRI104	616		Camel	Kenya/Somalia	PMC3850529
S.agal_CAMEL89	ILRI105	616		Camel	Kenya/Somalia	PMC3850529
S.agal_CAMEL90	ILRI106	616		Camel	Kenya/Somalia	PMC3850529
S.agal_CAMEL91	ILRI107	616		Camel	Kenya/Somalia	PMC3850529
S.agal_CAMEL92	ILRI108	616		Camel	Kenya/Somalia	PMC3850529
S.agal_CAMEL93	ILRI109	616		Camel	Kenya/Somalia	PMC3850529
S.agal_CAMEL94	ILRI110	616		Camel	Kenya/Somalia	PMC3850529
S.agal_CAMEL95	ILRI111	616		Camel	Kenya/Somalia	PMC3850529
S.agal_CAMEL99	ILRI115	616		Camel	Kenya/Somalia	PMC3850529
S.agal_CAMEL100	ILRI116	616		Camel	Kenya/Somalia	PMC3850529
S.agal_CAMEL102	ILRI118	616		Camel	Kenya/Somalia	PMC3850529
S.agal_CAMEL107	ILRI123	616		Camel	Kenya/Somalia	PMC3850529
S.agal_CAMEL109	ILRI125	616		Camel	Kenya/Somalia	PMC3850529	yes
S.agal_CAMEL37	ILRI023	617		Camel	Kenya/Somalia	PMC3850529
S.agal_CAMEL43	ILRI029	617		Camel	Kenya/Somalia	PMC3850529
S.agal_CAMEL48	ILRI034	617		Camel	Kenya/Somalia	PMC3850529
S.agal_CAMEL53	ILRI039	617		Camel	Kenya/Somalia	PMC3850529
S.agal_CAMEL30	ILRI044	617		Camel	Kenya/Somalia	PMC3850529
S.agal_CAMEL61	ILRI049	617		Camel	Kenya/Somalia	PMC3850529
S.agal_CAMEL67	ILRI055	617		Camel	Kenya/Somalia	PMC3850529
S.agal_CAMEL71	ILRI061	617		Camel	Kenya/Somalia	PMC3850529
S.agal_CAMEL72	ILRI062	617		Camel	Kenya/Somalia	PMC3850529
S.agal_CAMEL74	ILRI064	617		Camel	Kenya/Somalia	PMC3850529	yes
S.agal_CAMEL80	ILRI081	617		Camel	Kenya/Somalia	PMC3850529
S.agal_CAMEL85	ILRI101	617		Camel	Kenya/Somalia	PMC3850529
S.agal_CAMEL86	ILRI102	617		Camel	Kenya/Somalia	PMC3850529
S.agal_CAMEL87	ILRI103	617		Camel	Kenya/Somalia	PMC3850529
S.agal_CAMEL96	ILRI112	617		Camel	Kenya/Somalia	PMC3850529
S.agal_CAMEL97	ILRI113	617		Camel	Kenya/Somalia	PMC3850529
S.agal_CAMEL101	ILRI117	617		Camel	Kenya/Somalia	PMC3850529
S.agal_CAMEL106	ILRI122	617		Camel	Kenya/Somalia	PMC3850529
S.agal_CAMEL110	ILRI126	617		Camel	Kenya/Somalia	PMC3850529
S.agal_Camel112	ILRI128	617		Camel	Kenya/Somalia	PMC3850529	yes
S.agal_JF4674	JF4674	591		Cattle	Switzerland
S.agal_JF4676	JF4676	591		Cattle	Switzerland
S.agal_JF4677	JF4677	620		Cattle	Switzerland
S.agal_CH5	5	1	V	Human	Kenya	PMC3187314
S.agal_CH6	6	1	V	Human	Kenya	PMC3187314
S.agal_CH7	7	1	V	Human	Kenya	PMC3187314
S.agal_CH14	14	1	V	Human	Kenya	PMC3187314
S.agal_CH38	38	1	V	Human	Kenya	PMC3187314
S.agal_CH39	39	1	V	Human	Kenya	PMC3187314
S.agal_CH58	58	1	V	Human	Kenya	PMC3187314
S.agal_CH119	119	1	V	Human	Kenya	PMC3187314
S.agal_CH133	133	1	V	Human	Kenya	PMC3187314
S.agal_CH140	140	1	V	Human	Kenya	PMC3187314
S.agal_CH306	306	1	V	Human	Kenya	PMC3187314
S.agal_CH313	313	1	Ia	Human	Kenya	PMC3187314
S.agal_CH02-10	02_10	1	V	Human	Kenya	PMC3187314
S.agal_CH12-40	12_40	1	V	Human	Kenya	PMC3187314
S.agal_CH13	13	2	II	Human	Kenya	PMC3187314
S.agal_CH48	48	2	II	Human	Kenya	PMC3187314
S.agal_CH17-67	17_67	4	Ia	Human	Kenya	PMC3187314
S.agal_CH12	12	8	Ib	Human	Kenya	PMC3187314
S.agal_CH51	51	8	Ib	Human	Kenya	PMC3187314
S.agal_CH122	122	8	Ib	Human	Kenya	PMC3187314
S.agal_CH124	124	8	Ib	Human	Kenya	PMC3187314
S.agal_CH2	2	10	Ib	Human	Kenya	PMC3187314
S.agal_CH9	9	10	Ib	Human	Kenya	PMC3187314
S.agal_CH55	55	10	Ib	Human	Kenya	PMC3187314
S.agal_CH71	71	10	II	Human	Kenya	PMC3187314
S.agal_CH77	77	10	Ib	Human	Kenya	PMC3187314
S.agal_CH91	91	10	Ib	Human	Kenya	PMC3187314
S.agal_CH94	94	10	Ib	Human	Kenya	PMC3187314
S.agal_CH96	96	10	Ib	Human	Kenya	PMC3187314
S.agal_CH117	117	10	Ib	Human	Kenya	PMC3187314
S.agal_CH310	310	10	Ib	Human	Kenya	PMC3187314
S.agal_CH314	314	10	Ib	Human	Kenya	PMC3187314
S.agal_CH01-8	01_8	10	Ib	Human	Kenya	PMC3187314
S.agal_CH03-12	03_12	10	Ib	Human	Kenya	PMC3187314
S.agal_CH19-73	19_73	10	Ib	Human	Kenya	PMC3187314
S.agal_CH30-112	30-112	10	Ib	Human	Kenya	PMC3187314
S.agal_CH31-117	31-117	10	II	Human	Kenya	PMC3187314
S.agal_CH10	10	12	V	Human	Kenya	PMC3187314
S.agal_CH26	26	17	III	Human	Kenya	PMC3187314
S.agal_CH27	27	17	III	Human	Kenya	PMC3187314
S.agal_CH37	37	17	III	Human	Kenya	PMC3187314
S.agal_CH42	42	17	III	Human	Kenya	PMC3187314
S.agal_CH45	45	17	III	Human	Kenya	PMC3187314
S.agal_CH53	53	17	III	Human	Kenya	PMC3187314
S.agal_CH56	56	17	III	Human	Kenya	PMC3187314
S.agal_CH57	57	17	III	Human	Kenya	PMC3187314
S.agal_CH62	62	17	III	Human	Kenya	PMC3187314
S.agal_CH67	67	17	III	Human	Kenya	PMC3187314
S.agal_CH82	82	17	III	Human	Kenya	PMC3187314
S.agal_CH97	97	17	III	Human	Kenya	PMC3187314
S.agal_CH106	106	17	III	Human	Kenya	PMC3187314
S.agal_CH116	116	17	III	Human	Kenya	PMC3187314
S.agal_CH130	130	17	III	Human	Kenya	PMC3187314
S.agal_CH138	138	17	III	Human	Kenya	PMC3187314
S.agal_CH303	303	17	III	Human	Kenya	PMC3187314
S.agal_CH304	304	17	III	Human	Kenya	PMC3187314
S.agal_CH305	305	17	III	Human	Kenya	PMC3187314
S.agal_CH312	312	17	III	Human	Kenya	PMC3187314
S.agal_CH316	316	17	III	Human	Kenya	PMC3187314
S.agal_CH320	320	17	III	Human	Kenya	PMC3187314
S.agal_CH22-87	22_87	17	III	Human	Kenya	PMC3187314
S.agal_CH20	20	19	III	Human	Kenya	PMC3187314
S.agal_CH40	40	19	III	Human	Kenya	PMC3187314
S.agal_CH92	92	19	III	Human	Kenya	PMC3187314
S.agal_CH93	93	19	III	Human	Kenya	PMC3187314
S.agal_CH121	121	19	III	Human	Kenya	PMC3187314
S.agal_CH06-20	06_20	19	V	Human	Kenya	PMC3187314
S.agal_CH27-105	27_105	19	V	Human	Kenya	PMC3187314
S.agal_CH16	16	23	Ia	Human	Kenya	PMC3187314
S.agal_CH28	28	23	Ia	Human	Kenya	PMC3187314
S.agal_CH29	29	23	Ia	Human	Kenya	PMC3187314
S.agal_CH34	34	23	Ia	Human	Kenya	PMC3187314
S.agal_CH41	41	23	Ia	Human	Kenya	PMC3187314
S.agal_CH43	43	23	Ia	Human	Kenya	PMC3187314
S.agal_CH44	44	23	Ia	Human	Kenya	PMC3187314
S.agal_CH52	52	23	Ia	Human	Kenya	PMC3187314
S.agal_CH54	54	23	Ia	Human	Kenya	PMC3187314
S.agal_CH60	60	23	Ia	Human	Kenya	PMC3187314
S.agal_CH61	61	23	Ia	Human	Kenya	PMC3187314
S.agal_CH69	69	23	Ia	Human	Kenya	PMC3187314
S.agal_CH73	73	23	Ia	Human	Kenya	PMC3187314
S.agal_CH75	75	23	Ia	Human	Kenya	PMC3187314
S.agal_CH80	80	23	Ia	Human	Kenya	PMC3187314
S.agal_CH83	83	23	Ia	Human	Kenya	PMC3187314
S.agal_CH87	87	23	Ia	Human	Kenya	PMC3187314
S.agal_CH95	95	23	Ia	Human	Kenya	PMC3187314
S.agal_CH102	102	23	Ia	Human	Kenya	PMC3187314
S.agal_CH107	107	23	Ia	Human	Kenya	PMC3187314
S.agal_CH108	108	23	Ia	Human	Kenya	PMC3187314
S.agal_CH114	114	23	Ia	Human	Kenya	PMC3187314
S.agal_CH115	115	23	Ia	Human	Kenya	PMC3187314
S.agal_CH118	118	23	Ia	Human	Kenya	PMC3187314
S.agal_CH129	129	23	Ia	Human	Kenya	PMC3187314
S.agal_CH132	132	23	Ia	Human	Kenya	PMC3187314
S.agal_CH134	134	23	Ia	Human	Kenya	PMC3187314
S.agal_CH137	137	23	III	Human	Kenya	PMC3187314
S.agal_CH307	307	23	Ia	Human	Kenya	PMC3187314
S.agal_CH308	308	23	V	Human	Kenya	PMC3187314
S.agal_CH309	309	23	Ia	Human	Kenya	PMC3187314
S.agal_CH317	317	23	Ia	Human	Kenya	PMC3187314
S.agal_CH319	319	23	Ia	Human	Kenya	PMC3187314
S.agal_CH04-16	04_16	23	Ia	Human	Kenya	PMC3187314
S.agal_CH13-48	13_48	23	Ia	Human	Kenya	PMC3187314
S.agal_CH14-50	14_50	23	Ia	Human	Kenya	PMC3187314
S.agal_CH15-58	15_58	23	Ia	Human	Kenya	PMC3187314
S.agal_CH25-100	25_100	23	Ia	Human	Kenya	PMC3187314
S.agal_CH26-103	26_103	23	Ia	Human	Kenya	PMC3187314
S.agal_CH34-133	34_133	23	Ia	Human	Kenya	PMC3187314
S.agal_CH21	21	26	V	Human	Kenya	PMC3187314
S.agal_CH139	139	26	V	Human	Kenya	PMC3187314
S.agal_CH36-137	36_137	26	V	Human	Kenya	PMC3187314
S.agal_CH113	113	28	II	Human	Kenya	PMC3187314
S.agal_CH125	125	28	II	Human	Kenya	PMC3187314
S.agal_CH161	161	28	II	Human	Kenya	PMC3187314
S.agal_CH32-118	32-118	28	II	Human	Kenya	PMC3187314
S.agal_CH18	18	182	III	Human	Kenya	PMC3187314
S.agal_CH50	50	182	III	Human	Kenya	PMC3187314
S.agal_CH90	90	182	III	Human	Kenya	PMC3187314
S.agal_CH111	111	182	III	Human	Kenya	PMC3187314
S.agal_CH127	127	182	III	Human	Kenya	PMC3187314
S.agal_CH162	162	182	III	Human	Kenya	PMC3187314
S.agal_CH318	318	182	III	Human	Kenya	PMC3187314
S.agal_CH37-138	37_138	182	III	Human	Kenya	PMC3187314
S.agal_CH85	85	327	V	Human	Kenya	PMC3187314
S.agal_CH65	65	328	V	Human	Kenya	PMC3187314
S.agal_CH143	143	328	V	Human	Kenya	PMC3187314
S.agal_CH11-37	11_37	328	V	Human	Kenya	PMC3187314
S.agal_CH167	167	484	III	Human	Kenya	PMC3187314
S.agal_CH301	301	484	III	Human	Kenya	PMC3187314
S.agal_CH05-18	05_18	484	III	Human	Kenya	PMC3187314
S.agal_CH10-28	10_28	484	III	Human	Kenya	PMC3187314
S.agal_CH18-71	18_71	484	III	Human	Kenya	PMC3187314
S.agal_CH20-76	20_76	484	III	Human	Kenya	PMC3187314
S.agal_CH23-94	23_94	484	III	Human	Kenya	PMC3187314
S.agal_CH136	136	485	Ia	Human	Kenya	PMC3187314
S.agal_CH70	70	486	Ia	Human	Kenya	PMC3187314
S.agal_CH99	99	486	Ia	Human	Kenya	PMC3187314
S.agal_CH84	84	492	Ia	Human	Kenya	PMC3187314
S.agal_CH24-95	24_95	501	Ia	Human	Kenya	PMC3187314
S.agal_CH141	CH141	17	III	Human	Kenya	PMC3187314
S.agal_A11	A11	7	IV	Fish	Hong Kong		yes
S.agal_A1	A1	SLV7	Ia	Fish	Hong Kong		yes
S.agal_A23	A23	7	Ia	Fish	Hong Kong		yes
S.agal_A31	A31	7	Ia	Fish	Hong Kong		yes
S.agal_A41	A41	7	Ia	Fish	Hong Kong		yes
S.agal_A60	A60	7	NT	Fish	Hong Kong		yes
S.agal_A63	A63	7	Ia	Fish	Hong Kong		yes
S.agal_A12	A12	7	Ia	Fish	Hong Kong		yes
